# Supplementary material for: Catalytic stereospecific alkylation of malononitriles with enantioenriched primary allylic amines
Source: Royal Society of Chemistry journal article supplement (doi:10.1039/c3cc44914a), 2013-01-01

## Catalytic stereospecific alkylation of malononitriles with enantioenriched primary allylic amines

Man-Bo Li,<sup>a</sup> Hao Li,<sup>a</sup> Ju Wang,<sup>a</sup> Cong-Rong Liu<sup>a</sup> and Shi-Kai Tian<sup>\*ab</sup>

<sup>a</sup> Department of Chemistry, University of Science and Technology of China, Hefei, Anhui 230026, China

<sup>b</sup> Key Laboratory of Synthetic Chemistry of Natural Substances, Shanghai Institute of Organic Chemistry, Chinese Academy of Sciences, Shanghai 200032, China

### Supporting information

#### Table of contents

|                                                                                                                        |      |
|------------------------------------------------------------------------------------------------------------------------|------|
| General information.....                                                                                               | S-2  |
| Preparation of amine <b>1aa</b> .....                                                                                  | S-2  |
| General procedure for the stereospecific alkylation of malononitriles with enantioenriched primary allylic amines..... | S-3  |
| Analytical data for the products.....                                                                                  | S-3  |
| Alkylation of malononitrile ( <b>2a</b> ) with amine <b>1aa</b> .....                                                  | S-9  |
| Alkylation of malononitrile ( <b>2a</b> ) with amine <b>1ab</b> .....                                                  | S-9  |
| Transformations of substituted malononitrile <b>3a</b> .....                                                           | S-9  |
| Electrospray ionization mass spectrometric analysis of the reaction mixture....                                        | S-11 |
| Isolation of compound <b>10a</b> .....                                                                                 | S-12 |
| References.....                                                                                                        | S-13 |
| Copies of <sup>1</sup> H NMR and <sup>13</sup> C NMR spectra.....                                                      | S-14 |
| Copies of HPLC traces.....                                                                                             | S-58 |

## General information

$^1\text{H}$  NMR and  $^{13}\text{C}$  NMR spectra were recorded on a Bruker AC-400 FT spectrometer (400 MHz and 100 MHz, respectively) using tetramethylsilane as an internal reference. NMR multiplicities are abbreviated as follows: s = singlet, d = doublet, t = triplet, sept = septet, m = multiplet, br = broad signal. Chemical shifts ( $\delta$ ) and coupling constants ( $J$ ) were expressed in ppm and Hz, respectively. High resolution mass spectra (HRMS) were recorded on a LC-TOF spectrometer (Micromass). Electrospray ionization (ESI) mass spectrometry data were acquired using a Thermo LTQ Orbitrap XL instrument equipped with an ESI source and controlled by Xcalibur software. High pressure liquid chromatography (HPLC) analyses were performed on a Hewlett-Packard 1200 Series instrument equipped with an isostatic pump using a Daicel Chiralpak column (AD, AD-H, OD, or OJ, 250 x 4.6 mm) with isopropanol/hexane as mobile phase, and the UV detection was monitored at 254 nm or 210 nm. The chiral HPLC methods were calibrated with the corresponding racemic mixtures. Optical rotations were measured on a Perkin-Elmer 343 polarimeter with a sodium lamp at  $\lambda = 589$  nm and reported as  $[\alpha]_{\text{D}}^{T^\circ\text{C}}$  ( $c = \text{g}/100$  mL, solvent). Melting points were uncorrected.

Amines **1a-f** and **1i-j** were resolved from the corresponding racemic mixtures with (+)-tartaric acid,<sup>1a-c</sup> and their absolute configuration was assigned by comparison of the optical rotation or the chiral HPLC trace (for the derivative) with that reported in the literature.<sup>1</sup> Amines **1g-h** were prepared from *L*-valine according to the literature procedures.<sup>2</sup> Amine **1ab** was prepared by double methylation of amine **1a** according to the literature procedure.<sup>3</sup> Malononitriles **2b-j** were prepared following the literature procedures: (1) **2b** was prepared through copper-catalyzed arylation of malononitrile with iodobenzene;<sup>4a</sup> (2) **2c-f** and **2j** were prepared through reductive alkylation of malononitrile with aldehydes or ketones;<sup>4b</sup> and (3) **2g-i** were prepared through alkylation of malononitrile with alkyl halides.<sup>4c</sup> The rest of chemicals were purchased from the Sinopharm Chemical Reagent Co., Meryer, Acros, Alfa Aesar, and TCI, and used as received.

Abbreviations: Ac = acetyl, BINAP = 2,2'-bis(diphenylphosphino)-1,1'-binaphthyl, Cy = cyclohexyl, dba = dibenzylideneacetone, dppb = 1,4-bis(diphenylphosphino)butane, Np = naphthyl, rt = room temperature, THF = tetrahydrofuran, Xantphos = 4,5-bis(diphenylphosphino)-9,9-dimethylxanthene.

## Preparation of amine 1aa<sup>3</sup>

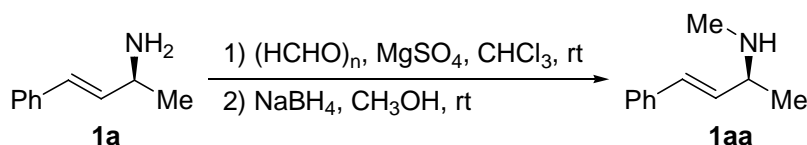

To a solution of amine **1a** (147 mg, 1.0 mmol)<sup>1a-c</sup> and paraformaldehyde (30.0 mg, 1.0 mmol) in dry chloroform (5.0 mL) was added magnesium sulfate (500 mg). The mixture was stirred at room temperature for 5 h. After filtration, the solvent was evaporated under reduced pressure. The residue was dissolved in methanol (5.0 mL),

and then NaBH<sub>4</sub> (38.0 mg, 1.0 mmol) was added. The mixture was stirred at room temperature for 1 h, added water (5.0 mL), and extracted with ethyl acetate (2 x 20 mL). The combined organic extracts were dried over anhydrous magnesium sulfate and concentrated. The residue was purified by silica gel chromatography, eluting with ethyl acetate, to give amine **1aa** (90.0 mg, 56%) as a colorless oil.<sup>5</sup> [ $\alpha$ ]<sub>D</sub><sup>20</sup> = -37.0 (*c* = 1.0, CHCl<sub>3</sub>); <sup>1</sup>H NMR (400 MHz, CDCl<sub>3</sub>)  $\delta$  7.40-7.18 (m, 5H), 6.46 (d, *J* = 16.0 Hz, 1H), 6.04 (dd, *J* = 16.0, 8.0 Hz, 1H), 3.26-3.17 (m, 1H), 2.39 (s, 3H), 1.23 (d, *J* = 6.4 Hz, 3H).

### General procedure for the stereospecific alkylation of malononitriles with enantioenriched primary allylic amines

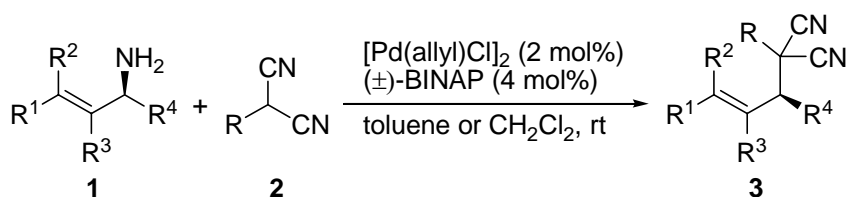

A mixture of amine **1** (0.50 mmol), malononitrile **2** (0.60 mmol), racemic BINAP (12.5 mg, 4 mol%), and [Pd(allyl)Cl]<sub>2</sub> (3.64 mg, 2 mol%) in toluene or dichloromethane (1.0 mL) was stirred under nitrogen at room temperature for 3 h or 8 h. The mixture was purified directly by silica gel chromatography, eluting with ethyl acetate/petroleum ether (1:5), to give compound **3**.

The absolute configuration of compound **3a** was assigned to be *S* by transforming it to known compound **6a** (see below) and that of the rest of products was assigned by analogy.

### Analytical data for the products

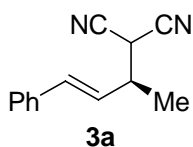

Compound **3a**, 95% ee as determined by HPLC analysis [Daicel Chiralcel AD,  $\lambda$  = 254 nm, isopropanol/hexane (3/97), flow rate 1.0 mL/min, *t*<sub>R</sub>: 16.0 min (major), 18.4 min (minor)], colorless oil; [ $\alpha$ ]<sub>D</sub><sup>20</sup> = -11.1 (*c* = 1.0, CHCl<sub>3</sub>); <sup>1</sup>H NMR (400 MHz, CDCl<sub>3</sub>)  $\delta$  7.42–7.26 (m, 5H), 6.66 (d, *J* = 15.6 Hz, 1H), 6.10 (dd, *J* = 15.6, 8.0 Hz, 1H), 3.72 (d, *J* = 5.6 Hz, 1H), 3.09–2.98 (m, 1H), 1.45 (d, *J* = 6.8 Hz, 3H); <sup>13</sup>C NMR (100 MHz, CDCl<sub>3</sub>)  $\delta$  135.6, 134.6, 128.7, 128.5, 126.7, 126.0, 111.7, 39.3, 29.9, 17.7; HRMS (EI) calcd for C<sub>13</sub>H<sub>12</sub>N<sub>2</sub> (M) 196.1000, found 196.0992.

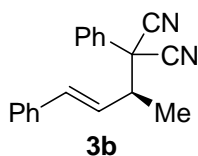

Compound **3b**, 95% ee as determined by HPLC analysis [Daicel Chiralcel AD,  $\lambda$  = 254 nm, isopropanol/hexane (1/99), flow rate 1.0 mL/min,  $t_R$ : 11.0 min (minor), 12.2 min (major)], white solid; m.p. 73–74 °C;  $[\alpha]_D^{20}$  = -51.2 ( $c$  = 1.0, CHCl<sub>3</sub>); <sup>1</sup>H NMR (400 MHz, CDCl<sub>3</sub>)  $\delta$  7.57–7.51 (m, 2H), 7.50–7.41 (m, 3H), 7.33–7.22 (m, 5H), 6.43 (d,  $J$  = 16.0 Hz, 1H), 6.01 (dd,  $J$  = 16.0, 8.4 Hz, 1H), 3.13–3.05 (m, 1H), 1.37 (d,  $J$  = 6.8 Hz, 3H); <sup>13</sup>C NMR (100 MHz, CDCl<sub>3</sub>)  $\delta$  135.9, 135.5, 130.8, 129.9, 129.4, 128.7, 128.3, 126.6, 125.2, 114.4, 48.8, 48.3, 16.4; HRMS (ESI) calcd for C<sub>19</sub>H<sub>16</sub>N<sub>2</sub>Na<sup>+</sup> (M + Na)<sup>+</sup> 295.1206, found 295.1199.

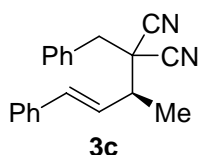

Compound **3c**, 95% ee as determined by HPLC analysis [Daicel Chiralcel AD,  $\lambda$  = 254 nm, isopropanol/hexane (1/99), flow rate 1.0 mL/min,  $t_R$ : 20.3 min (minor), 21.6 min (major)], white solid; m.p. 108–109 °C;  $[\alpha]_D^{20}$  = -32.3 ( $c$  = 1.0, CHCl<sub>3</sub>); <sup>1</sup>H NMR (400 MHz, CDCl<sub>3</sub>)  $\delta$  7.51–7.27 (m, 10H), 6.65 (d,  $J$  = 15.6 Hz, 1H), 6.18 (dd,  $J$  = 15.6, 9.2 Hz, 1H), 3.24 (d,  $J$  = 13.6 Hz, 1H), 3.11 (d,  $J$  = 13.6 Hz, 1H), 2.96–2.84 (m, 1H), 1.55 (d,  $J$  = 6.8 Hz, 3H); <sup>13</sup>C NMR (100 MHz, CDCl<sub>3</sub>)  $\delta$  135.7, 135.6, 132.4, 130.2, 128.9, 128.8, 128.7, 128.6, 126.7, 125.5, 114.9, 114.3, 45.1, 44.8, 41.7, 17.7; HRMS (EI) calcd for C<sub>20</sub>H<sub>18</sub>N<sub>2</sub> (M) 286.1470, found 286.1466.

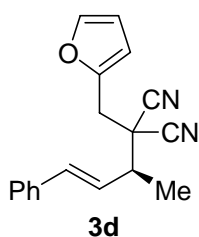

Compound **3d**, 95% ee as determined by HPLC analysis [Daicel Chiralcel AD,  $\lambda$  = 254 nm, isopropanol/hexane (1/99), flow rate 1.0 mL/min,  $t_R$ : 19.3 min (major), 21.9 min (minor)], colorless oil;  $[\alpha]_D^{20}$  = -49.3 ( $c$  = 1.0, CHCl<sub>3</sub>); <sup>1</sup>H NMR (400 MHz, CDCl<sub>3</sub>)  $\delta$  7.47–7.25 (m, 6H), 6.66 (d,  $J$  = 16.0 Hz, 1H), 6.44 (d,  $J$  = 3.2 Hz, 1H), 6.40 (dd,  $J$  = 3.2, 1.6 Hz, 1H), 6.12 (dd,  $J$  = 16.0, 8.8 Hz, 1H), 3.36 (d,  $J$  = 15.2 Hz, 1H), 3.29 (d,  $J$  = 15.2 Hz, 1H), 2.93–2.80 (m, 1H), 1.52 (d,  $J$  = 6.8 Hz, 3H); <sup>13</sup>C NMR (100 MHz, CDCl<sub>3</sub>)  $\delta$  146.4, 143.4, 135.8, 135.6, 128.7, 128.5, 126.7, 125.0, 114.6, 114.1, 110.9, 110.6, 43.8, 43.0, 34.5, 17.4; HRMS (EI) calcd for C<sub>18</sub>H<sub>16</sub>N<sub>2</sub>O (M) 276.1263, found 276.1262.

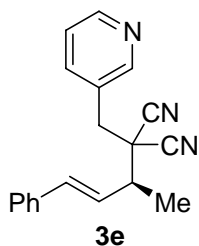

Compound **3e**, 95% ee as determined by HPLC analysis [Daicel Chiralcel AD,  $\lambda$  = 254 nm, isopropanol/hexane (10/90), flow rate 1.0 mL/min,  $t_R$ : 15.7 min (minor), 19.5 min (major)], white solid; m.p. 112–113 °C;  $[\alpha]_D^{20}$  = -30.9 ( $c$  = 1.0, CHCl<sub>3</sub>); <sup>1</sup>H NMR (400 MHz, CDCl<sub>3</sub>)  $\delta$  8.67–8.61 (m, 2H), 7.78 (d,  $J$  = 7.6 Hz, 1H), 7.47–7.23 (m, 6H), 6.68 (d,  $J$  = 16.0 Hz, 1H), 6.17 (dd,  $J$  = 16.0, 9.2 Hz, 1H), 3.25 (d,  $J$  = 13.6 Hz, 1H), 3.13 (d,  $J$  = 13.6 Hz, 1H), 2.95–2.88 (m, 1H), 1.57 (d,  $J$  = 6.4 Hz, 3H); <sup>13</sup>C NMR (100 MHz, CDCl<sub>3</sub>)  $\delta$  151.0, 150.2, 137.6, 136.0, 135.5, 128.8, 128.7, 128.4, 126.7, 125.0, 123.7, 114.5, 113.8, 45.0, 44.8, 39.1, 17.8; HRMS (EI) calcd for C<sub>19</sub>H<sub>17</sub>N<sub>3</sub> (M) 287.1422, found 287.1424.

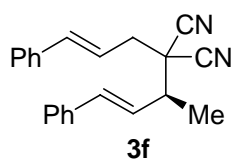

Compound **3f**, 95% ee as determined by HPLC analysis [Daicel Chiralcel AD,  $\lambda$  = 254 nm, isopropanol/hexane (1/99), flow rate 1.0 mL/min,  $t_R$ : 17.4 min (minor), 20.2 min (major)], colorless oil;  $[\alpha]_D^{20}$  = -104.1 ( $c$  = 1.0, CHCl<sub>3</sub>); <sup>1</sup>H NMR (400 MHz, CDCl<sub>3</sub>)  $\delta$  7.45–7.22 (m, 10H), 6.68 (d,  $J$  = 15.6 Hz, 1H), 6.62 (d,  $J$  = 15.6 Hz, 1H), 6.24 (dt,  $J$  = 15.6, 7.6 Hz, 1H), 6.11 (dd,  $J$  = 15.6, 9.2 Hz, 1H), 2.95–2.85 (m, 2H), 2.84–2.74 (m, 1H), 1.52 (d,  $J$  = 6.8 Hz, 3H); <sup>13</sup>C NMR (100 MHz, CDCl<sub>3</sub>)  $\delta$  137.6, 135.8, 135.7, 135.5, 128.8, 128.7, 128.5, 126.7, 119.3, 114.9, 114.4, 44.0, 43.3, 39.5, 17.5; HRMS (EI) calcd for C<sub>22</sub>H<sub>20</sub>N<sub>2</sub> (M) 312.1626, found 312.1632.

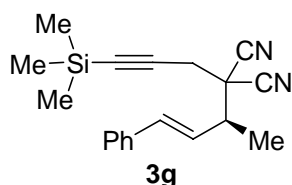

Compound **3g**, 95% ee as determined by HPLC analysis [Daicel Chiralcel AD,  $\lambda$  = 254 nm, isopropanol/hexane (1/99), flow rate 1.0 mL/min,  $t_R$ : 12.6 min (minor), 15.1 min (major)], white solid; m.p. 78–79 °C;  $[\alpha]_D^{20}$  = -51.1 ( $c$  = 1.0, CHCl<sub>3</sub>); <sup>1</sup>H NMR (400 MHz, CDCl<sub>3</sub>)  $\delta$  7.42–7.26 (m, 5H), 6.66 (d,  $J$  = 15.6 Hz, 1H), 6.02 (dd,  $J$  = 15.6, 9.2 Hz, 1H), 3.10–3.00 (m, 1H), 2.99 (d,  $J$  = 16.8 Hz, 1H), 2.86 (d,  $J$  = 16.8 Hz, 1H), 1.52 (d,  $J$  = 6.8 Hz, 3H), 0.22 (s, 9H); <sup>13</sup>C NMR (100 MHz, CDCl<sub>3</sub>)  $\delta$  136.5, 136.1, 129.3, 129.2, 127.3, 125.1, 114.9, 114.3, 96.7, 93.4, 44.0, 42.7, 28.9, 17.9, 0.3; HRMS (EI) calcd for C<sub>19</sub>H<sub>22</sub>N<sub>2</sub>Si (M) 306.1552, found 306.1550.

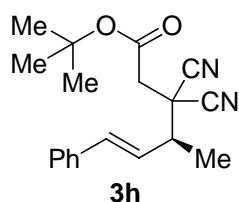

Compound **3h**, 95% ee as determined by HPLC analysis [Daicel Chiralcel AD,  $\lambda$  =

254 nm, isopropanol/hexane (5/95), flow rate 1.0 mL/min,  $t_R$ : 7.4 min (minor), 9.1 min (major)], colorless oil;  $[\alpha]_D^{20} = -26.5$  ( $c = 1.0$ ,  $\text{CHCl}_3$ );  $^1\text{H}$  NMR (400 MHz,  $\text{CDCl}_3$ )  $\delta$  7.54–7.23 (m, 5H), 6.60 (d,  $J = 16.0$  Hz, 1H), 6.05 (dd,  $J = 16.0$ , 9.2 Hz, 1H), 3.05–2.93 (m, 1H), 2.95 (d,  $J = 16.8$  Hz, 1H), 2.81 (d,  $J = 16.8$  Hz, 1H), 1.53 (d,  $J = 7.6$  Hz, 3H), 1.52 (s, 9H);  $^{13}\text{C}$  NMR (100 MHz,  $\text{CDCl}_3$ )  $\delta$  165.6, 135.9, 135.5, 128.8, 128.7, 126.7, 124.9, 114.7, 113.9, 84.0, 44.5, 40.9, 39.1, 27.9, 17.3; HRMS (EI) calcd for  $\text{C}_{19}\text{H}_{22}\text{N}_2\text{O}_2$  (M) 310.1681, found 310.1679.

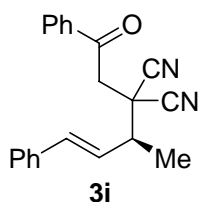

Compound **3i**, 95% ee as determined by HPLC analysis [Daicel Chiralcel AD,  $\lambda = 254$  nm, isopropanol/hexane (5/95), flow rate 1.0 mL/min,  $t_R$ : 19.8 min (major), 21.8 min (minor)], white solid; m.p. 104–105 °C;  $[\alpha]_D^{20} = -54.0$  ( $c = 1.0$ ,  $\text{CHCl}_3$ );  $^1\text{H}$  NMR (400 MHz,  $\text{CDCl}_3$ )  $\delta$  7.89 (dd,  $J = 8.4$ , 1.2 Hz, 2H), 7.65–7.56 (m, 1H), 7.51–7.43 (m, 2H), 7.36–7.27 (m, 5H), 6.61 (d,  $J = 15.6$  Hz, 1H), 6.11 (dd,  $J = 15.6$ , 9.2 Hz, 1H), 3.69 (d,  $J = 18.0$  Hz, 1H), 3.64 (d,  $J = 18.0$  Hz, 1H), 3.23–3.11 (m, 1H), 1.58 (d,  $J = 6.8$  Hz, 3H);  $^{13}\text{C}$  NMR (100 MHz,  $\text{CDCl}_3$ )  $\delta$  192.2, 135.8, 135.5, 135.0, 134.4, 129.0, 128.8, 128.6, 128.1, 126.7, 125.3, 115.0, 114.2, 43.9, 43.8, 38.4, 17.5; HRMS (EI) calcd for  $\text{C}_{21}\text{H}_{18}\text{N}_2\text{O}$  (M) 314.1419, found 314.1415.

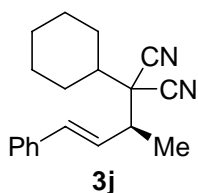

Compound **3j**, 95% ee as determined by HPLC analysis [Daicel Chiralcel AD,  $\lambda = 254$  nm, isopropanol/hexane (1/99), flow rate 1.0 mL/min,  $t_R$ : 8.0 min (major), 12.1 min (minor)], colorless oil;  $[\alpha]_D^{20} = -42.6$  ( $c = 1.0$ ,  $\text{CHCl}_3$ );  $^1\text{H}$  NMR (400 MHz,  $\text{CDCl}_3$ )  $\delta$  7.43–7.24 (m, 5H), 6.60 (d,  $J = 16.0$  Hz, 1H), 6.09 (dd,  $J = 16.0$ , 9.2 Hz, 1H), 3.03–2.92 (m, 1H), 2.08–1.93 (m, 2H), 1.91–1.80 (m, 3H), 1.73–1.70 (m, 1H), 1.47 (d,  $J = 6.8$  Hz, 3H), 1.46–1.20 (m, 5H);  $^{13}\text{C}$  NMR (100 MHz,  $\text{CDCl}_3$ )  $\delta$  135.9, 134.5, 128.7, 128.4, 126.6, 125.8, 114.5, 114.3, 48.9, 41.8, 41.1, 27.7, 25.7, 25.6, 25.5, 17.6, 5.6; HRMS (EI) calcd for  $\text{C}_{19}\text{H}_{22}\text{N}_2$  (M) 278.1783, found 278.1787.

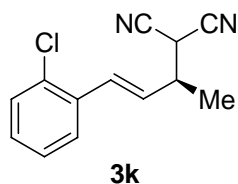

Compound **3k**, 95% ee as determined by HPLC analysis [Daicel Chiralcel AD,  $\lambda =$

254 nm, isopropanol/hexane (1/99), flow rate 1.0 mL/min,  $t_R$ : 31.2 min (minor), 34.8 min (major)], colorless oil;  $[\alpha]_D^{20} = +10.7$  ( $c = 1.0$ ,  $\text{CHCl}_3$ );  $^1\text{H}$  NMR (400 MHz,  $\text{CDCl}_3$ )  $\delta$  7.55–7.49 (m, 1H), 7.40–7.34 (m, 1H), 7.32–7.21 (m, 2H), 7.06 (d,  $J = 16.0$  Hz, 1H), 6.10 (dd,  $J = 16.0, 8.0$  Hz, 1H), 3.77 (d,  $J = 5.6$  Hz, 1H), 3.18–3.05 (m, 1H), 1.49 (d,  $J = 6.8$  Hz, 3H);  $^{13}\text{C}$  NMR (100 MHz,  $\text{CDCl}_3$ )  $\delta$  131.0, 129.8, 129.5, 128.9, 127.1, 127.0, 111.6, 111.5, 39.3, 29.8, 17.6; HRMS (EI) calcd for  $\text{C}_{13}\text{H}_{11}\text{N}_2\text{Cl}$  (M) 230.0611, found 230.0614.

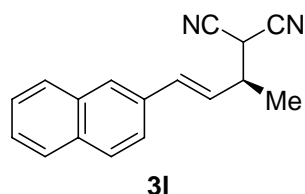

Compound **3l**, 90% ee as determined by HPLC analysis [Daicel Chiralcel AD,  $\lambda = 254$  nm, isopropanol/hexane (3/97), flow rate 1.0 mL/min,  $t_R$ : 30.8 min (major), 34.9 min (minor)], white solid; m.p. 122–123 °C;  $[\alpha]_D^{20} = -11.4$  ( $c = 1.0$ ,  $\text{CHCl}_3$ );  $^1\text{H}$  NMR (400 MHz,  $\text{CDCl}_3$ )  $\delta$  7.88–7.73 (m, 4H), 7.60–7.55 (m, 1H), 7.56–7.44 (m, 2H), 6.81 (d,  $J = 16.0$  Hz, 1H), 6.23 (dd,  $J = 16.0, 8.0$  Hz, 1H), 3.76 (d,  $J = 5.6$  Hz, 1H), 3.16–3.03 (m, 1H), 1.49 (d,  $J = 6.8$  Hz, 3H);  $^{13}\text{C}$  NMR (100 MHz,  $\text{CDCl}_3$ )  $\delta$  134.7, 133.4, 133.3, 133.0, 128.5, 128.1, 127.7, 127.1, 126.5, 126.4, 126.2, 123.3, 111.7, 111.6, 39.4, 29.9, 17.7; HRMS (EI) calcd for  $\text{C}_{17}\text{H}_{14}\text{N}_2$  (M) 246.1157, found 246.1154.

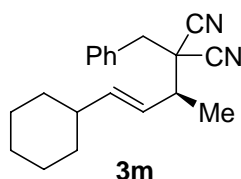

Compound **3m**, 98% ee as determined by HPLC analysis [Daicel Chiralcel OD,  $\lambda = 210$  nm, isopropanol/hexane (1/99), flow rate 1.0 mL/min,  $t_R$ : 13.5 min (major), 14.9 min (minor)], colorless oil;  $[\alpha]_D^{20} = +9.8$  ( $c = 1.0$ ,  $\text{CHCl}_3$ );  $^1\text{H}$  NMR (400 MHz,  $\text{CDCl}_3$ )  $\delta$  7.43–7.33 (m, 5H), 5.70 (dd,  $J = 15.6, 6.8$  Hz, 1H), 5.45–5.34 (m, 1H), 3.16 (d,  $J = 14.0$  Hz, 1H), 3.03 (d,  $J = 14.0$  Hz, 1H), 2.67–2.57 (m, 1H), 2.08–2.00 (m, 1H), 1.78–1.61 (m, 5H), 1.41 (d,  $J = 6.8$  Hz, 3H), 1.33–1.06 (m, 5H);  $^{13}\text{C}$  NMR (100 MHz,  $\text{CDCl}_3$ )  $\delta$  143.2, 132.7, 130.2, 128.9, 128.6, 124.0, 115.0, 114.4, 45.1, 44.2, 41.5, 40.7, 32.8, 32.7, 26.0, 25.8, 17.6; HRMS (EI) calcd for  $\text{C}_{20}\text{H}_{24}\text{N}_2$  (M) 292.1939, found 292.1936.

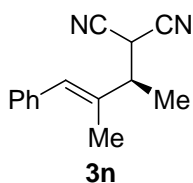

Compound **3n**, 90% ee as determined by HPLC analysis [Daicel Chiralcel OD,  $\lambda = 254$  nm, isopropanol/hexane (5/95), flow rate 1.0 mL/min,  $t_R$ : 21.5 min (major), 24.6

min (minor)], colorless oil;  $[\alpha]_{\text{D}}^{20} = -9.6$  ( $c = 1.0$ ,  $\text{CHCl}_3$ );  $^1\text{H}$  NMR (400 MHz,  $\text{CDCl}_3$ )  $\delta$  7.40–7.33 (m, 2H), 7.29–7.22 (m, 3H), 6.59 (s, 1H), 3.80 (d,  $J = 7.6$  Hz, 1H), 3.05–2.95 (m, 1H), 1.88 (d,  $J = 1.6$  Hz, 3H), 1.49 (d,  $J = 6.8$  Hz, 3H);  $^{13}\text{C}$  NMR (100 MHz,  $\text{CDCl}_3$ )  $\delta$  136.5, 134.3, 130.3, 128.9, 128.3, 127.2, 112.1, 111.9, 44.8, 28.4, 16.6, 14.8; HRMS (EI) calcd for  $\text{C}_{14}\text{H}_{14}\text{N}_2$  (M) 210.1157, found 210.1153.

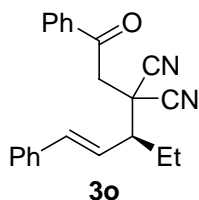

Compound **3o**, 90% ee as determined by HPLC analysis [Daicel Chiralcel AD,  $\lambda = 254$  nm, isopropanol/hexane (5/95), flow rate 1.0 mL/min,  $t_{\text{R}}$ : 13.2 min (major), 15.1 min (minor)], white solid; m.p. 101–102 °C;  $[\alpha]_{\text{D}}^{20} = -43.9$  ( $c = 1.0$ ,  $\text{CHCl}_3$ );  $^1\text{H}$  NMR (400 MHz,  $\text{CDCl}_3$ )  $\delta$  7.90–7.85 (m, 2H), 7.62–7.56 (m, 1H), 7.49–7.41 (m, 2H), 7.36–7.25 (m, 5H), 6.59 (d,  $J = 15.6$  Hz, 1H), 5.95 (dd,  $J = 15.6$ , 10.0 Hz, 1H), 3.69 (d,  $J = 18.0$  Hz, 1H), 3.65 (d,  $J = 18.0$  Hz, 1H), 2.90–2.81 (m, 1H), 2.20–2.11 (m, 1H), 1.84–1.74 (m, 1H), 1.02 (t,  $J = 7.2$  Hz, 3H);  $^{13}\text{C}$  NMR (100 MHz,  $\text{CDCl}_3$ )  $\delta$  192.3, 137.6, 135.4, 135.0, 134.4, 129.0, 128.8, 128.6, 128.1, 126.7, 123.8, 115.2, 114.4, 50.9, 44.0, 37.9, 24.5, 11.8; HRMS (EI) calcd for  $\text{C}_{22}\text{H}_{20}\text{N}_2\text{O}$  (M) 328.1576, found 328.1568.

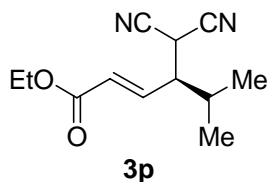

Compound **3p**, >99% ee as determined by HPLC analysis [Daicel Chiralcel AS,  $\lambda = 210$  nm, isopropanol/hexane (5/95), flow rate 1.0 mL/min,  $t_{\text{R}}$ : 18.4 min (major)], colorless oil;  $[\alpha]_{\text{D}}^{20} = +20.0$  ( $c = 1.0$ ,  $\text{CHCl}_3$ );  $^1\text{H}$  NMR (400 MHz,  $\text{CDCl}_3$ )  $\delta$  6.75 (dd,  $J = 15.6$ , 10.0 Hz, 1H), 6.10 (d,  $J = 15.6$  Hz, 1H), 4.24 (q,  $J = 7.2$  Hz, 2H), 3.92 (d,  $J = 6.4$  Hz, 1H), 2.61–2.52 (m, 1H), 2.16–2.04 (m, 1H), 1.32 (t,  $J = 7.2$  Hz, 3H), 1.05 (d,  $J = 6.8$  Hz, 3H), 0.99 (d,  $J = 6.8$ , 3H);  $^{13}\text{C}$  NMR (100 MHz,  $\text{CDCl}_3$ )  $\delta$  164.8, 140.4, 128.1, 111.5, 111.0, 61.0, 50.0, 29.7, 26.1, 20.6, 18.8, 14.2; HRMS (EI) calcd for  $\text{C}_{12}\text{H}_{16}\text{N}_2\text{O}_2$  (M) 220.1212, found 220.1219.

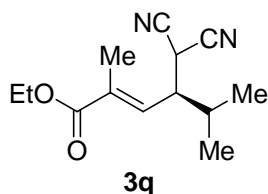

Compound **3q**, >99% ee as determined by HPLC analysis [Daicel Chiralcel AS,  $\lambda = 210$  nm, isopropanol/hexane (2/98), flow rate 1.0 mL/min,  $t_{\text{R}}$ : 22.4 min (major)],



colorless oil;  $[\alpha]_D^{20} = +27.7$  ( $c = 1.0$ ,  $\text{CHCl}_3$ );  $^1\text{H}$  NMR (400 MHz,  $\text{CDCl}_3$ )  $\delta$  6.61–6.55 (m, 1H), 4.25 (q,  $J = 7.2$  Hz, 2H), 3.88 (d,  $J = 6.0$  Hz, 1H), 2.93–2.84 (m, 1H), 2.14–2.04 (m, 1H), 1.97 (d,  $J = 1.6$  Hz, 3H), 1.33 (t,  $J = 6.8$  Hz, 3H), 1.04 (d,  $J = 6.8$  Hz, 3H), 0.97 (d,  $J = 6.8$  Hz, 3H);  $^{13}\text{C}$  NMR (100 MHz,  $\text{CDCl}_3$ )  $\delta$  166.7, 134.9, 133.9, 111.7, 111.1, 61.3, 46.2, 30.4, 25.9, 20.5, 18.6, 14.2, 13.5; HRMS (EI) calcd for  $\text{C}_{13}\text{H}_{18}\text{N}_2\text{O}_2$  (M) 234.1368, found 234.1372.

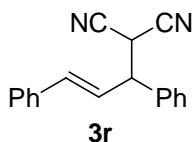

Compound **3r**,<sup>6</sup> white solid; m.p. 66–67 °C;  $^1\text{H}$  NMR (400 MHz,  $\text{CDCl}_3$ )  $\delta$  7.46–7.26 (m, 10H), 6.70 (d,  $J = 16.0$  Hz, 1H), 6.46 (dd,  $J = 16.0, 8.0$  Hz, 1H), 4.12–4.01 (m, 2H);  $^{13}\text{C}$  NMR (100 MHz,  $\text{CDCl}_3$ )  $\delta$  136.6, 135.8, 135.5, 129.4, 128.9, 128.7, 128.6, 127.7, 126.8, 123.9, 111.8, 111.7, 49.7, 30.2.

### Alkylation of malononitrile (**2a**) with amine **1aa**

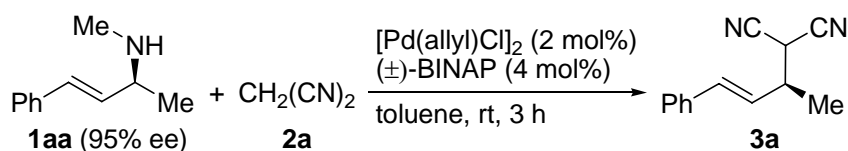

A mixture of amine **1aa** (80.5 mg, 0.50 mmol), malononitrile **2a** (39.6 mg, 0.60 mmol), racemic BINAP (12.5 mg, 4 mol%), and  $[\text{Pd(allyl)Cl}]_2$  (3.64 mg, 2 mol%) in toluene (1.0 mL) was stirred under nitrogen at room temperature for 3 h. The mixture was purified by silica gel chromatography, eluting with ethyl acetate/petroleum ether (1:5), to give compound **3a** (55.0 mg, 56%) as a colorless oil.

### Alkylation of malononitrile (**2a**) with amine **1ab**

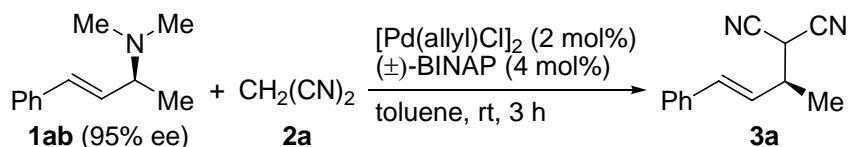

A mixture of amine **1ab** (87.5 mg, 0.50 mmol), malononitrile **2a** (39.6 mg, 0.60 mmol), racemic BINAP (12.5 mg, 4 mol%), and  $[\text{Pd(allyl)Cl}]_2$  (3.64 mg, 2 mol%) in toluene (1.0 mL) was stirred under nitrogen at room temperature for 3 h. The mixture was purified by silica gel chromatography, eluting with ethyl acetate/petroleum ether (1:5), to give compound **3a** (7.8 mg, 8%) as a colorless oil.

### Transformations of substituted malononitrile **3a**

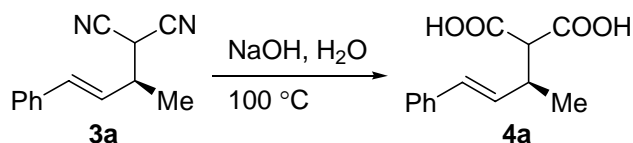

To a mixture of malononitrile **3a** (95% ee, 196 mg, 1.0 mmol) and water (5 mL) at room temperature was added sodium hydroxide (200 mg, 5.0 mmol) carefully. The mixture was heated under reflux for 5 h and then cooled to room temperature. The mixture was extracted with dichloromethane (2 x 20 mL). The product was recovered from the aqueous layer by treatment with aqueous hydrogen chloride (1 M, 10.0 mL) and extracted with dichloromethane (2 x 20 mL). The combined organic extracts were dried over anhydrous sodium sulfate and then concentrated to give diacid **4a** (201 mg, 86%) as a white solid. m.p. 118–119 °C;  $[\alpha]_{\text{D}}^{20} = -52.6$  ( $c = 1.0$ ,  $\text{CHCl}_3$ );  $^1\text{H}$  NMR (400 MHz,  $\text{CDCl}_3$ )  $\delta$  10.72 (s, br, 2H), 7.41–7.21 (m, 5H), 6.47 (d,  $J = 16.0$  Hz, 1H), 6.13 (dd,  $J = 16.0, 8.4$  Hz, 1H), 3.44 (d,  $J = 8.4$  Hz, 1H), 3.14–3.04 (m, 1H), 1.22 (d,  $J = 6.8$  Hz, 3H);  $^{13}\text{C}$  NMR (100 MHz,  $\text{CDCl}_3$ )  $\delta$  173.4, 136.9, 131.4, 130.5, 128.6, 127.5, 126.4, 57.5, 37.7, 18.3; HRMS (EI) calcd for  $\text{C}_{13}\text{H}_{14}\text{O}_4$  (M) 234.0892, found 234.0899.

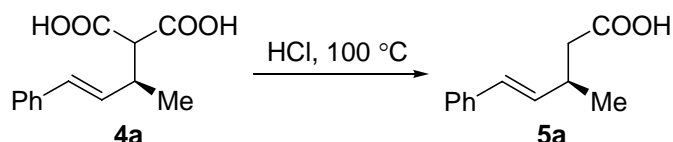

To diacid **4a** (117 mg, 0.50 mmol) at room temperature was added aqueous hydrogen chloride (3 M, 1.0 mL). After that the mixture was heated under reflux for 8 h. The mixture was cooled to room temperature and extracted with dichloromethane (2 x 20 mL). The combined organic extracts were dried over anhydrous sodium sulfate and then concentrated. The residue was purified by silica gel chromatography (ethyl acetate/petroleum ether = 1/1) to give acid **5a** (73.2 mg, 77%) as a colorless oil.<sup>7</sup>  $[\alpha]_{\text{D}}^{20} = -33.3$  ( $c = 1.0$ ,  $\text{CHCl}_3$ );  $^1\text{H}$  NMR (400 MHz,  $\text{CDCl}_3$ )  $\delta$  7.41–7.19 (m, 5H), 6.42 (d,  $J = 16.0$  Hz, 1H), 6.15 (dd,  $J = 16.0, 7.6$  Hz, 1H), 2.91–2.82 (m, 1H), 2.53–2.36 (m, 2H), 1.18 (d,  $J = 6.8$  Hz, 3H);  $^{13}\text{C}$  NMR (100 MHz,  $\text{CDCl}_3$ )  $\delta$  177.6, 137.1, 133.9, 129.0, 128.5, 127.2, 126.2, 41.2, 33.7, 20.2.

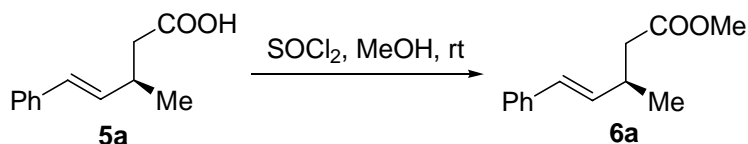

Thionyl chloride (59.5 mg, 36.3  $\mu\text{L}$ , 0.50 mmol) was added dropwise to a solution of acid **5a** (57.0 mg, 0.30 mmol) in methanol (1.0 mL) at 0 °C. The mixture was stirred at room temperature for 1 h and then quenched with ice water (5.0 mL). The mixture was extracted with dichloromethane (2 x 20 mL). The combined organic extracts were dried over anhydrous sodium sulfate and then concentrated. The residue was purified by silica gel chromatography (ethyl acetate/petroleum ether = 1/5) to give ester **6a** (50.1 mg, 80%) as a colorless oil.<sup>8</sup>  $[\alpha]_{\text{D}}^{20} = -62.6$  ( $c = 1.0$ ,  $\text{CCl}_4$ ), Lit.:<sup>8</sup>

79% ee,  $[\alpha]_D^{20} = -49.2$  ( $c = 1.3$ ,  $\text{CCl}_4$ );  $^1\text{H}$  NMR (400 MHz,  $\text{CDCl}_3$ )  $\delta$  7.42–7.20 (m, 5H), 6.41 (d,  $J = 16.0$  Hz, 1H), 6.14 (dd,  $J = 16.0, 7.6$  Hz, 1H), 3.67 (s, 3H), 2.91–2.80 (m, 1H), 2.49–2.33 (m, 2H), 1.15 (d,  $J = 6.8$  Hz, 3H);  $^{13}\text{C}$  NMR (100 MHz,  $\text{CDCl}_3$ )  $\delta$  172.7, 137.3, 134.2, 128.9, 128.5, 127.1, 126.1, 51.3, 41.4, 34.0, 20.2.

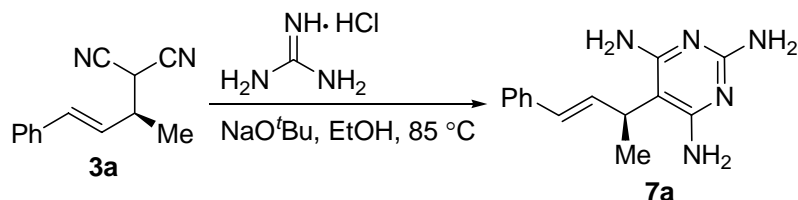

A mixture of malononitrile **3a** (196 mg, 1.0 mmol), guanidine hydrochloride (105 mg, 1.1 mmol), sodium *tert*-butoxide (106 mg, 1.1 mmol) in ethanol (1.0 mL) was refluxed at 85 °C for 8 h. After filtration, the solution was cooled to 0 °C to give a white solid. Recrystallization from ethanol gave pyrimidine **7a** (235 mg, 92%) as a white solid. m.p. 242–243 °C;  $[\alpha]_D^{20} = -9.1$  ( $c = 1.0$ ,  $\text{CHCl}_3$ );  $^1\text{H}$  NMR (400 MHz,  $\text{DMSO-d}_6$ )  $\delta$  7.44–7.40 (m, 2H), 7.34–7.27 (m, 2H), 7.24–7.17 (m, 1H), 6.55–6.41 (m, 2H), 5.37 (s, br, 4H), 5.25 (s, br, 2H), 3.76–3.69 (m, 1H), 1.31 (d,  $J = 7.2$  Hz, 3H);  $^{13}\text{C}$  NMR (100 MHz,  $\text{DMSO}$ )  $\delta$  161.8, 160.8, 137.2, 134.7, 128.5, 127.6, 127.0, 125.9, 88.5, 30.9, 16.2; HRMS (EI) calcd for  $\text{C}_{14}\text{H}_{17}\text{N}_5$  (M) 255.1484, found 255.1483.

### Electrospray ionization mass spectrometric analysis of the reaction mixture

A mixture of amine **1a** (73.5 mg, 0.50 mmol), malononitrile **2a** (39.6 mg, 0.60 mmol), racemic BINAP (12.5 mg, 4 mol%), and  $[\text{Pd}(\text{allyl})\text{Cl}]_2$  (3.64 mg, 2 mol%) in toluene (1.0 mL) was stirred under nitrogen at room temperature for 10 min. The mixture was cooled to room temperature and subjected to ESI-MS (positive mode) analysis. Copied below is the spectrum we obtained and the species have been identified according to the high resolution mass data.

20121104\_HESI+ \_LMB09\_71 #103 RT: 1.45 AV: 1 NL: 2.98E5  
T: FTMS + c ESI Full ms [200.00-4000.00]

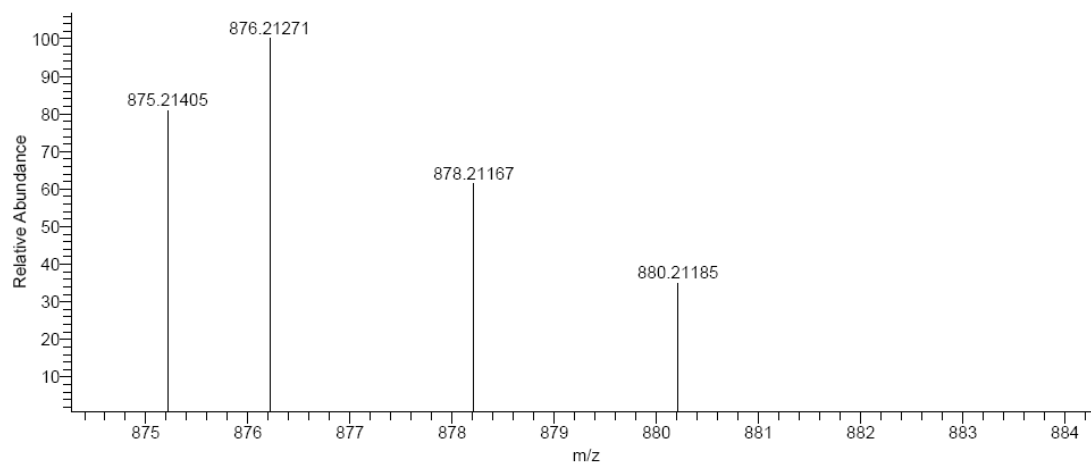

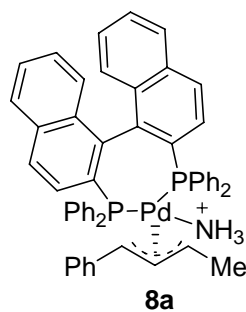

$\pi$ -Allylpalladium **8a**: HRMS (ESI) calcd for  $C_{50}H_{46}NP_2Pd^+$  876.21348, found 876.21271.

20121104\_HESI+ \_LMB09\_71 #15 RT: 0.20 AV: 1 NL: 7.90E8  
T: FTMS + c ESI Full ms [200.00-4000.00]

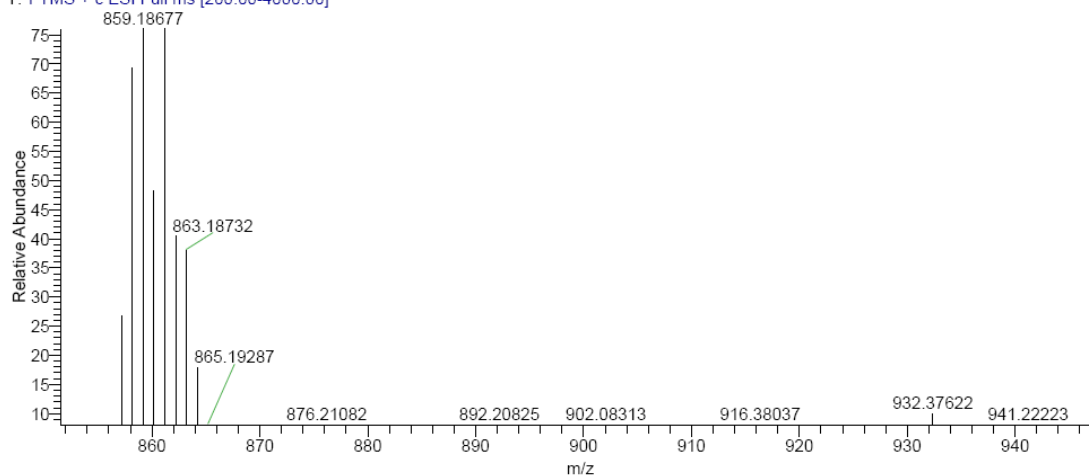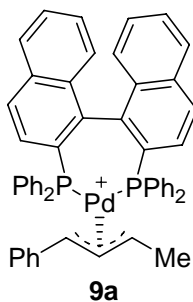

$\pi$ -Allylpalladium **9a**: HRMS (ESI) calcd for  $C_{54}H_{43}P_2Pd^+$  859.18693, found 859.18677.

### Isolation of compound 10a

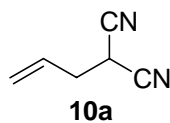

A mixture of amine **1a** (147 mg, 1.0 mmol), malononitrile (**2a**) (79.0 mg, 1.2 mmol), racemic BINAP (25.0 mg, 4 mol%), and  $[Pd(allyl)Cl]_2$  (7.28 mg, 2 mol%) in

toluene (2.0 mL) was stirred under nitrogen at room temperature for 3 h. The mixture was purified by silica gel chromatography, eluting with ethyl acetate/petroleum ether (1:20), to give compound **10a** (3.9 mg, 92% yield based on [Pd(allyl)Cl]<sub>2</sub>) as a colorless oil.<sup>9</sup> <sup>1</sup>H NMR (400 MHz, CDCl<sub>3</sub>)  $\delta$  5.92–5.79 (m, 1H), 5.44–5.37 (m, 2H), 3.80 (t, *J* = 6.8 Hz, 1H), 2.78–2.73 (m, 2H).

## References

- 1 (a) T. G. Schenck and B. Bosnich, *J. Am. Chem. Soc.*, 1985, **107**, 2058; (b) M.-B. Li, Y. Wang and S.-K. Tian, *Angew. Chem. Int. Ed.*, 2012, **51**, 2968; (c) X.-S. Wu, Y. Chen, M.-B. Li, M.-G. Zhou and S.-K. Tian, *J. Am. Chem. Soc.*, 2012, **134**, 14694; (d) E. G. Klauber, N. Mittal, T. K. Shah and D. Seidel, *Org. Lett.*, 2011, **13**, 2464.
- 2 C. Dai and C. R. J. Stephenson, *Org. Lett.*, 2010, **12**, 3453.
- 3 Y. Yamamoto, J. Oda and Y. Inouye, *J. Org. Chem.*, 1976, **41**, 303.
- 4 (a) K. Okuro, M. Furuune, M. Miura and M. Nomura, *J. Org. Chem.*, 1993, **58**, 7606; (b) J. C. Dunham, A. D. Richardson and R. E. Sammelson, *Synthesis*, 2006, 680; (c) E. Díez-barra, A. de la Hoz, A. Moreno and P. Sánchez-Verdú, *J. Chem. Soc. Perkin Trans. I*, 1991, 2589.
- 5 For a racemic form, see: S.-I. Murahashi, Y. Imada, Y. Taniguchi and Y. Koderu, *Tetrahedron Lett.*, 1988, **29**, 2973.
- 6 J.-H. Xie, H.-F. Duan, B.-M. Fan, X. Cheng, L.-X. Wang and Q.-L. Zhou, *Adv. Synth. Catal.*, 2004, **346**, 625.
- 7 For a racemic form, see: J. Kluegge, E. Herdtweck and T. Bach, *Synlett*, 2004, 1199.
- 8 T. Hayashi, A. Yamamoto and T. Hagihara, *J. Org. Chem.*, 1986, **51**, 723.
- 9 S. Ma, S. Yu and W. Qian, *Tetrahedron*, 2005, **61**, 4157.

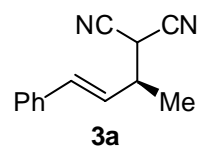

$^1\text{H}$  NMR (400 MHz,  $\text{CDCl}_3$ )

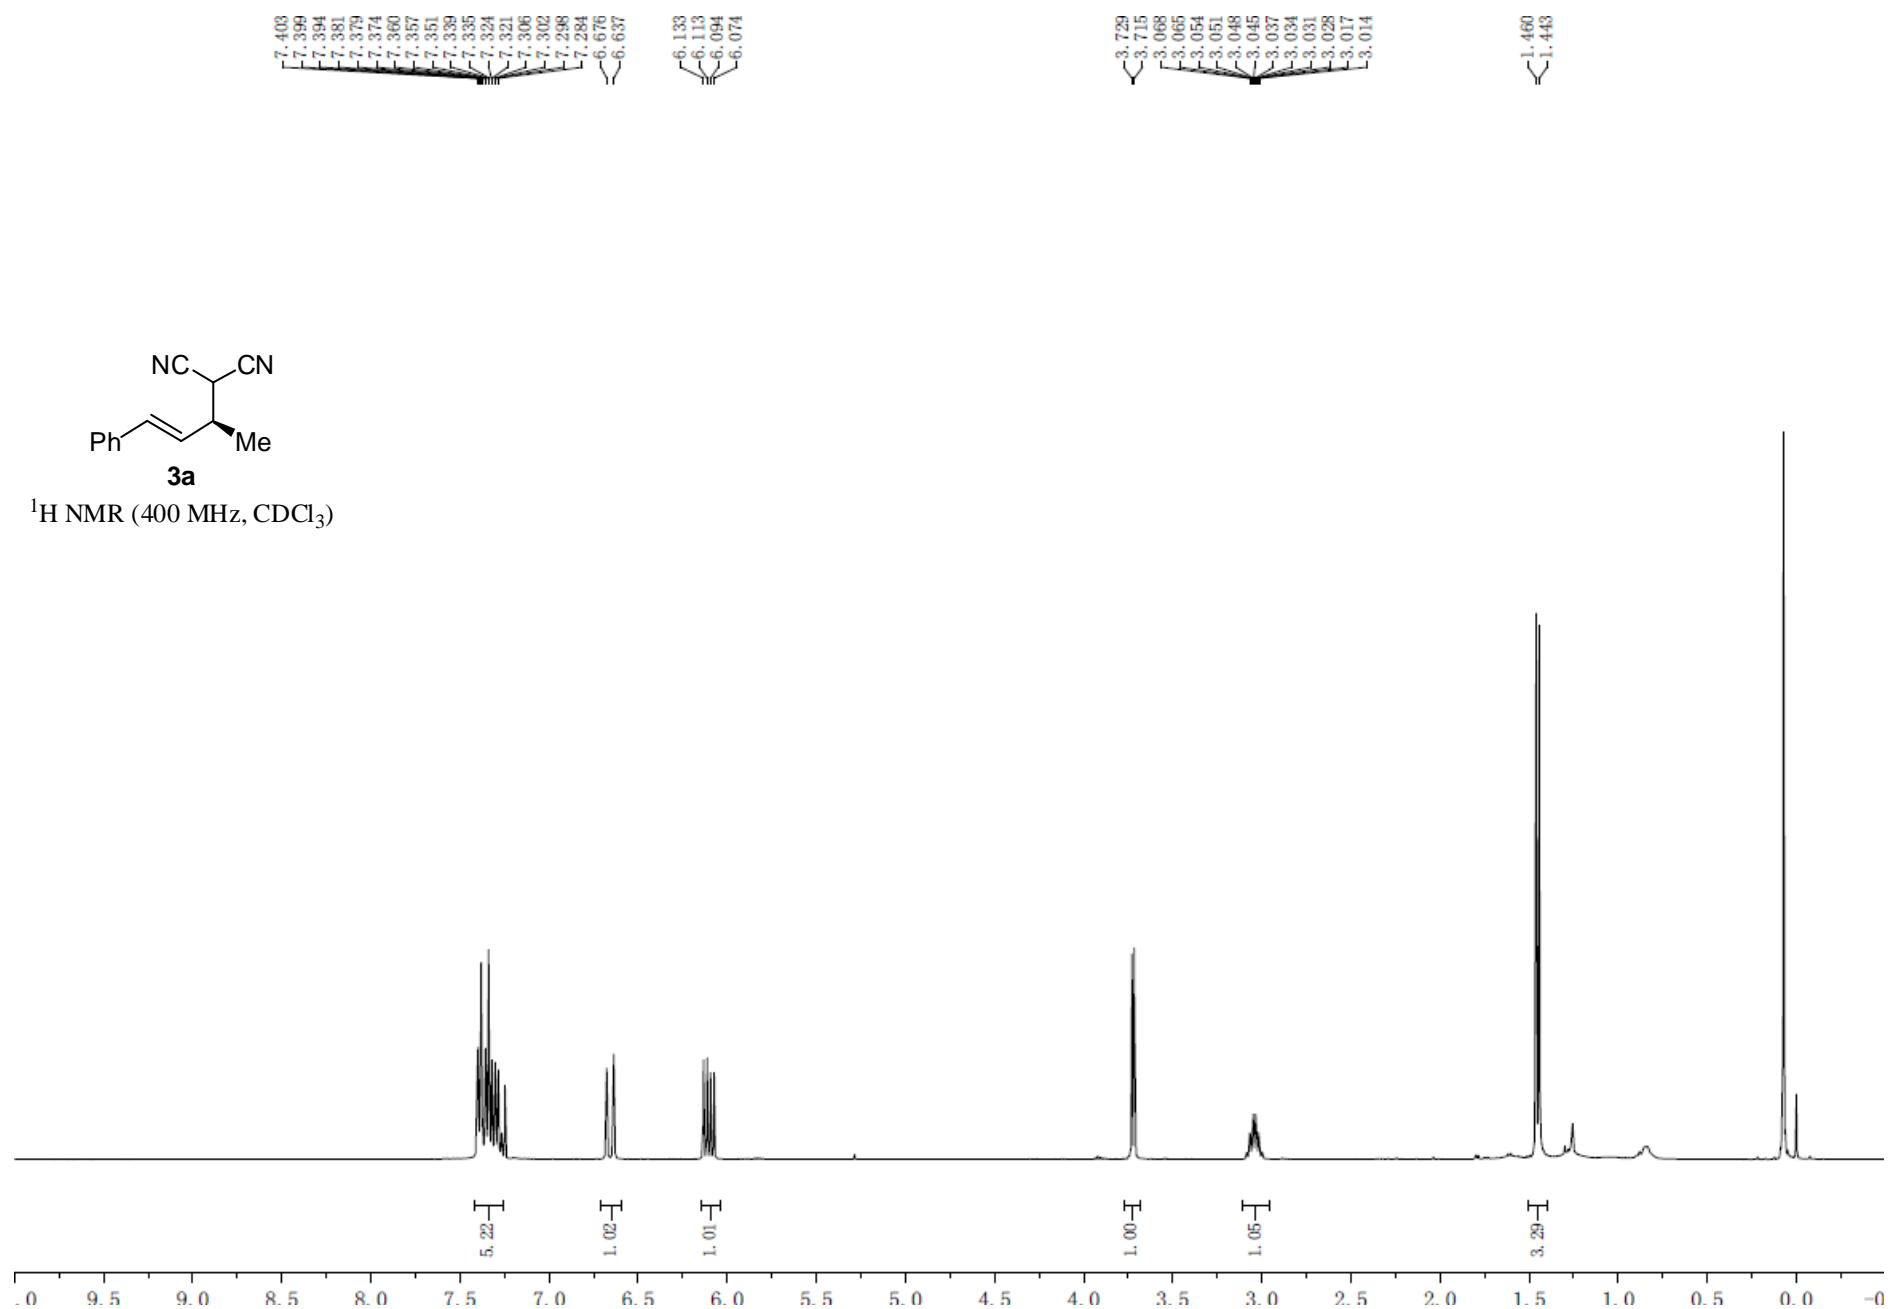

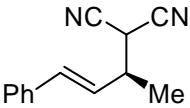

**3a**

<sup>13</sup>C NMR (100 MHz, CDCl<sub>3</sub>)

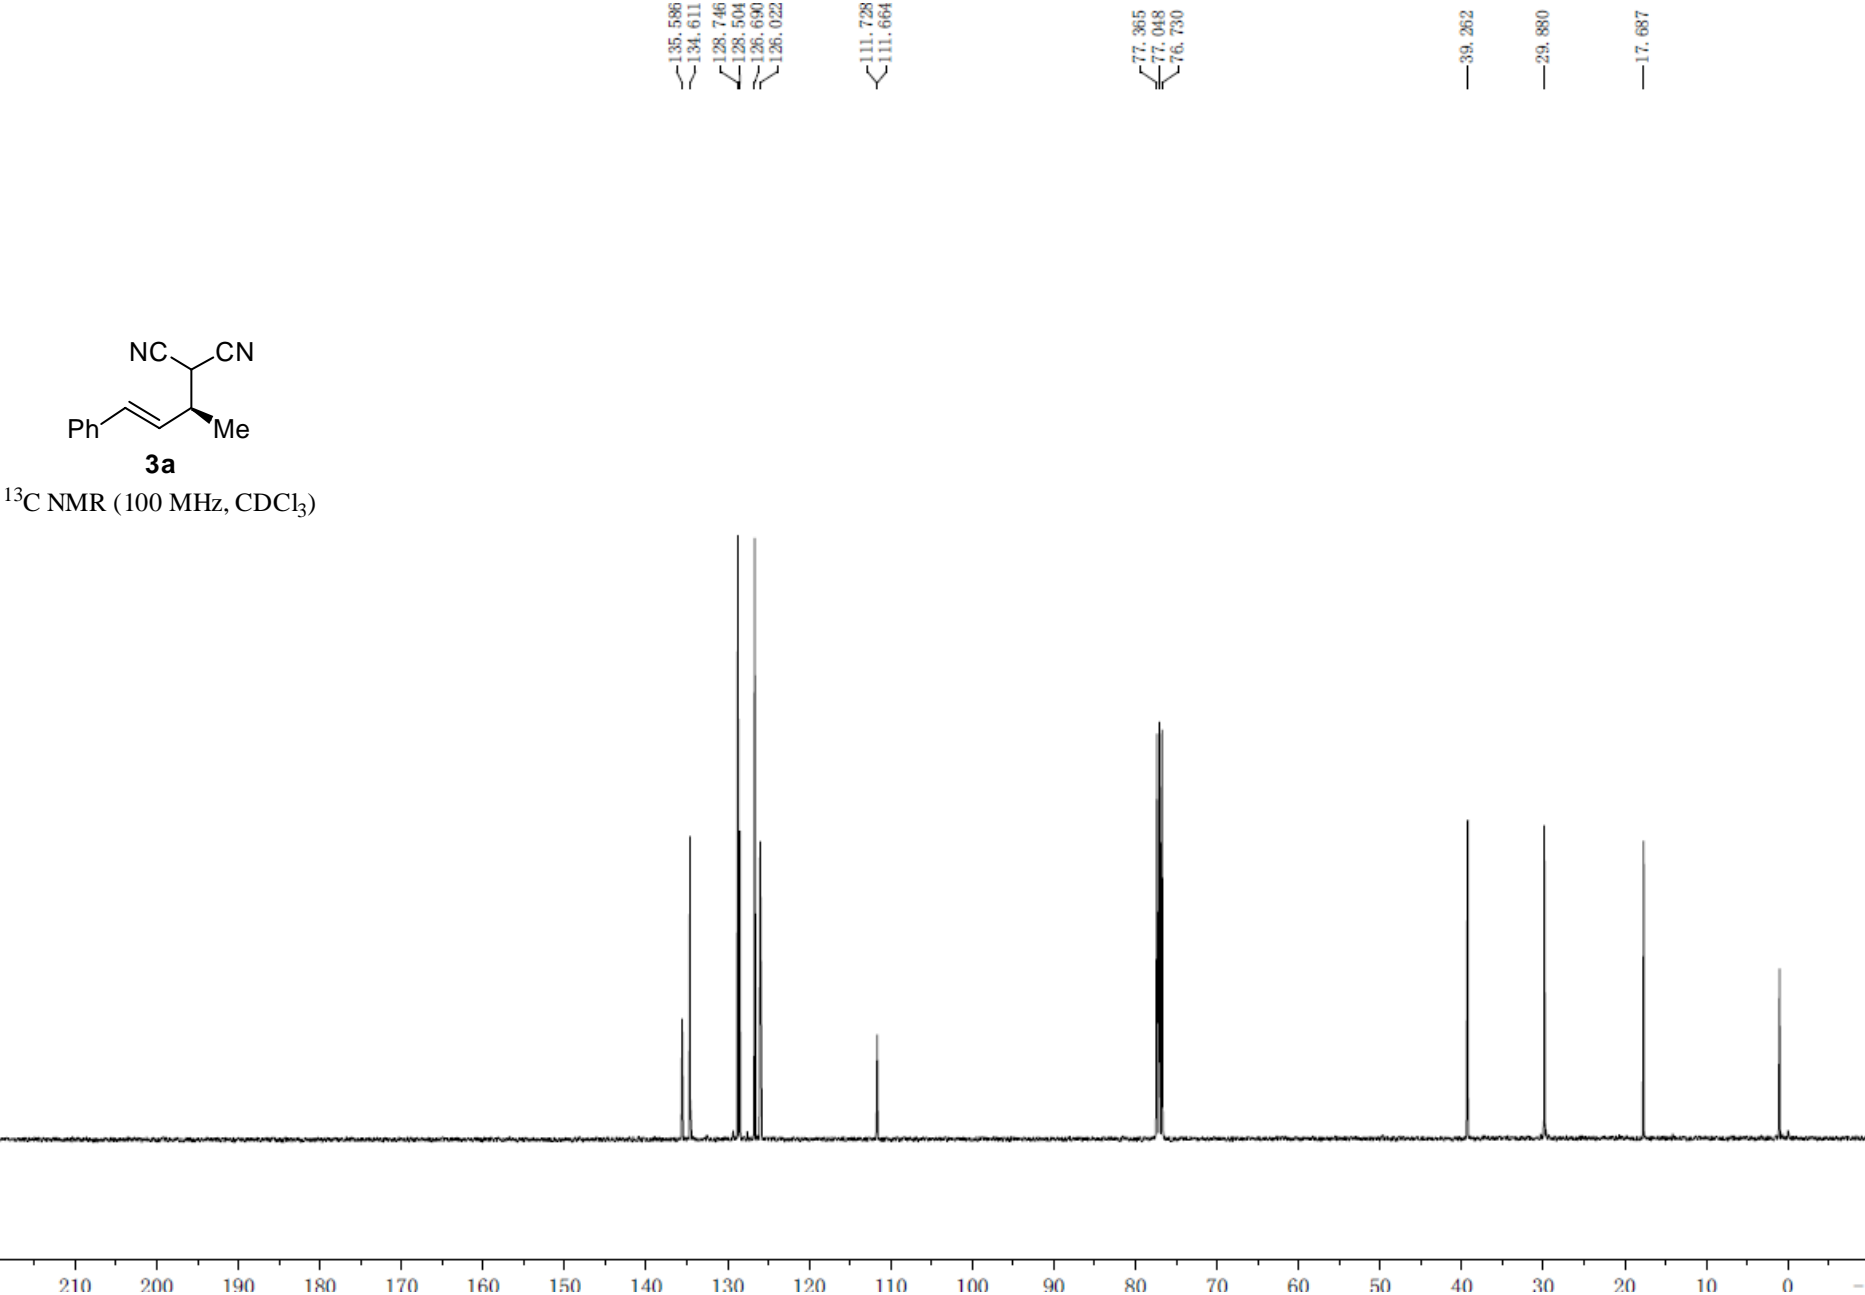

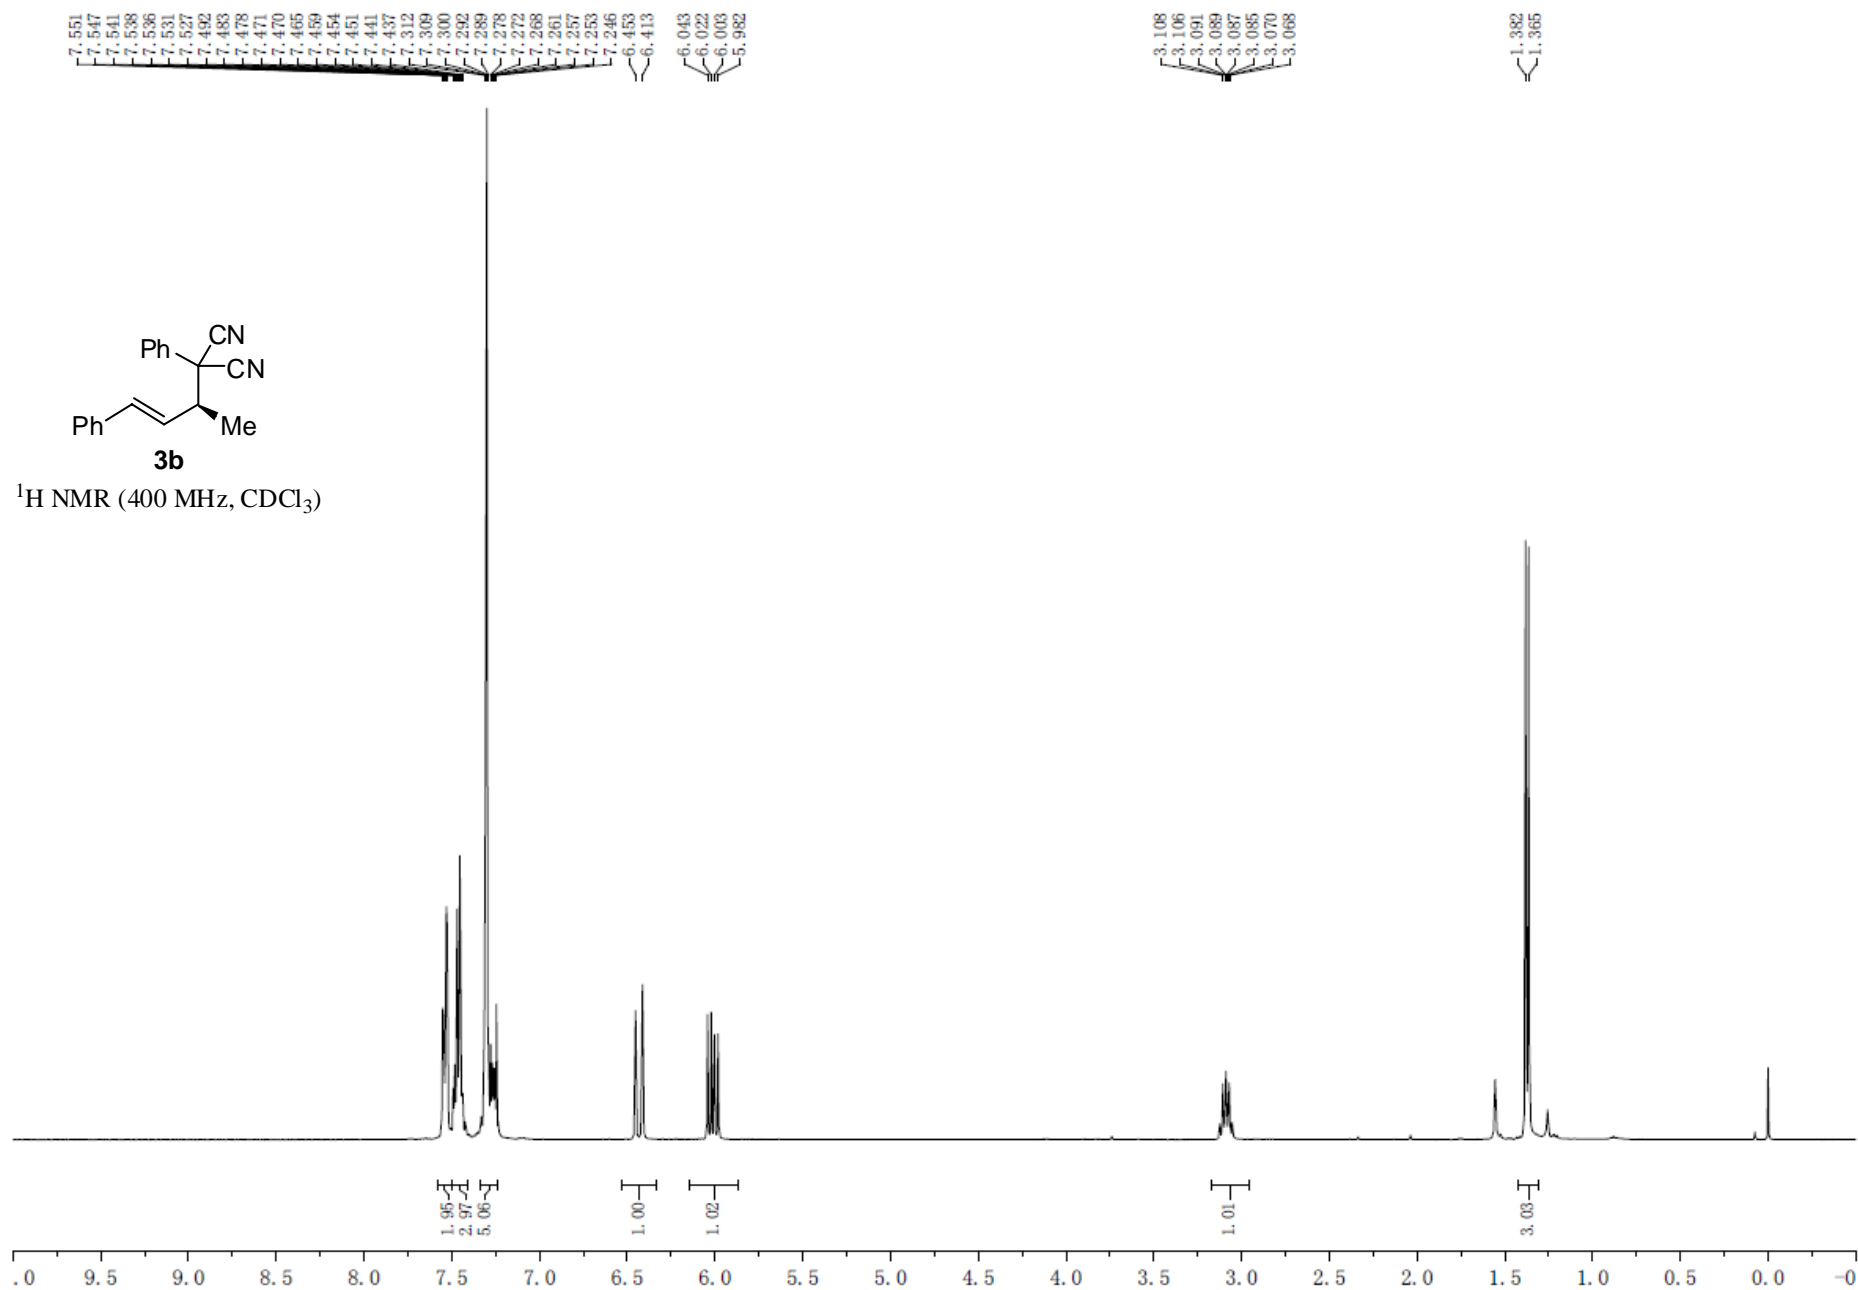



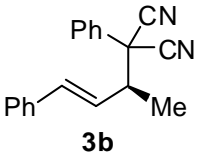

<sup>13</sup>C NMR (100 MHz, CDCl<sub>3</sub>)

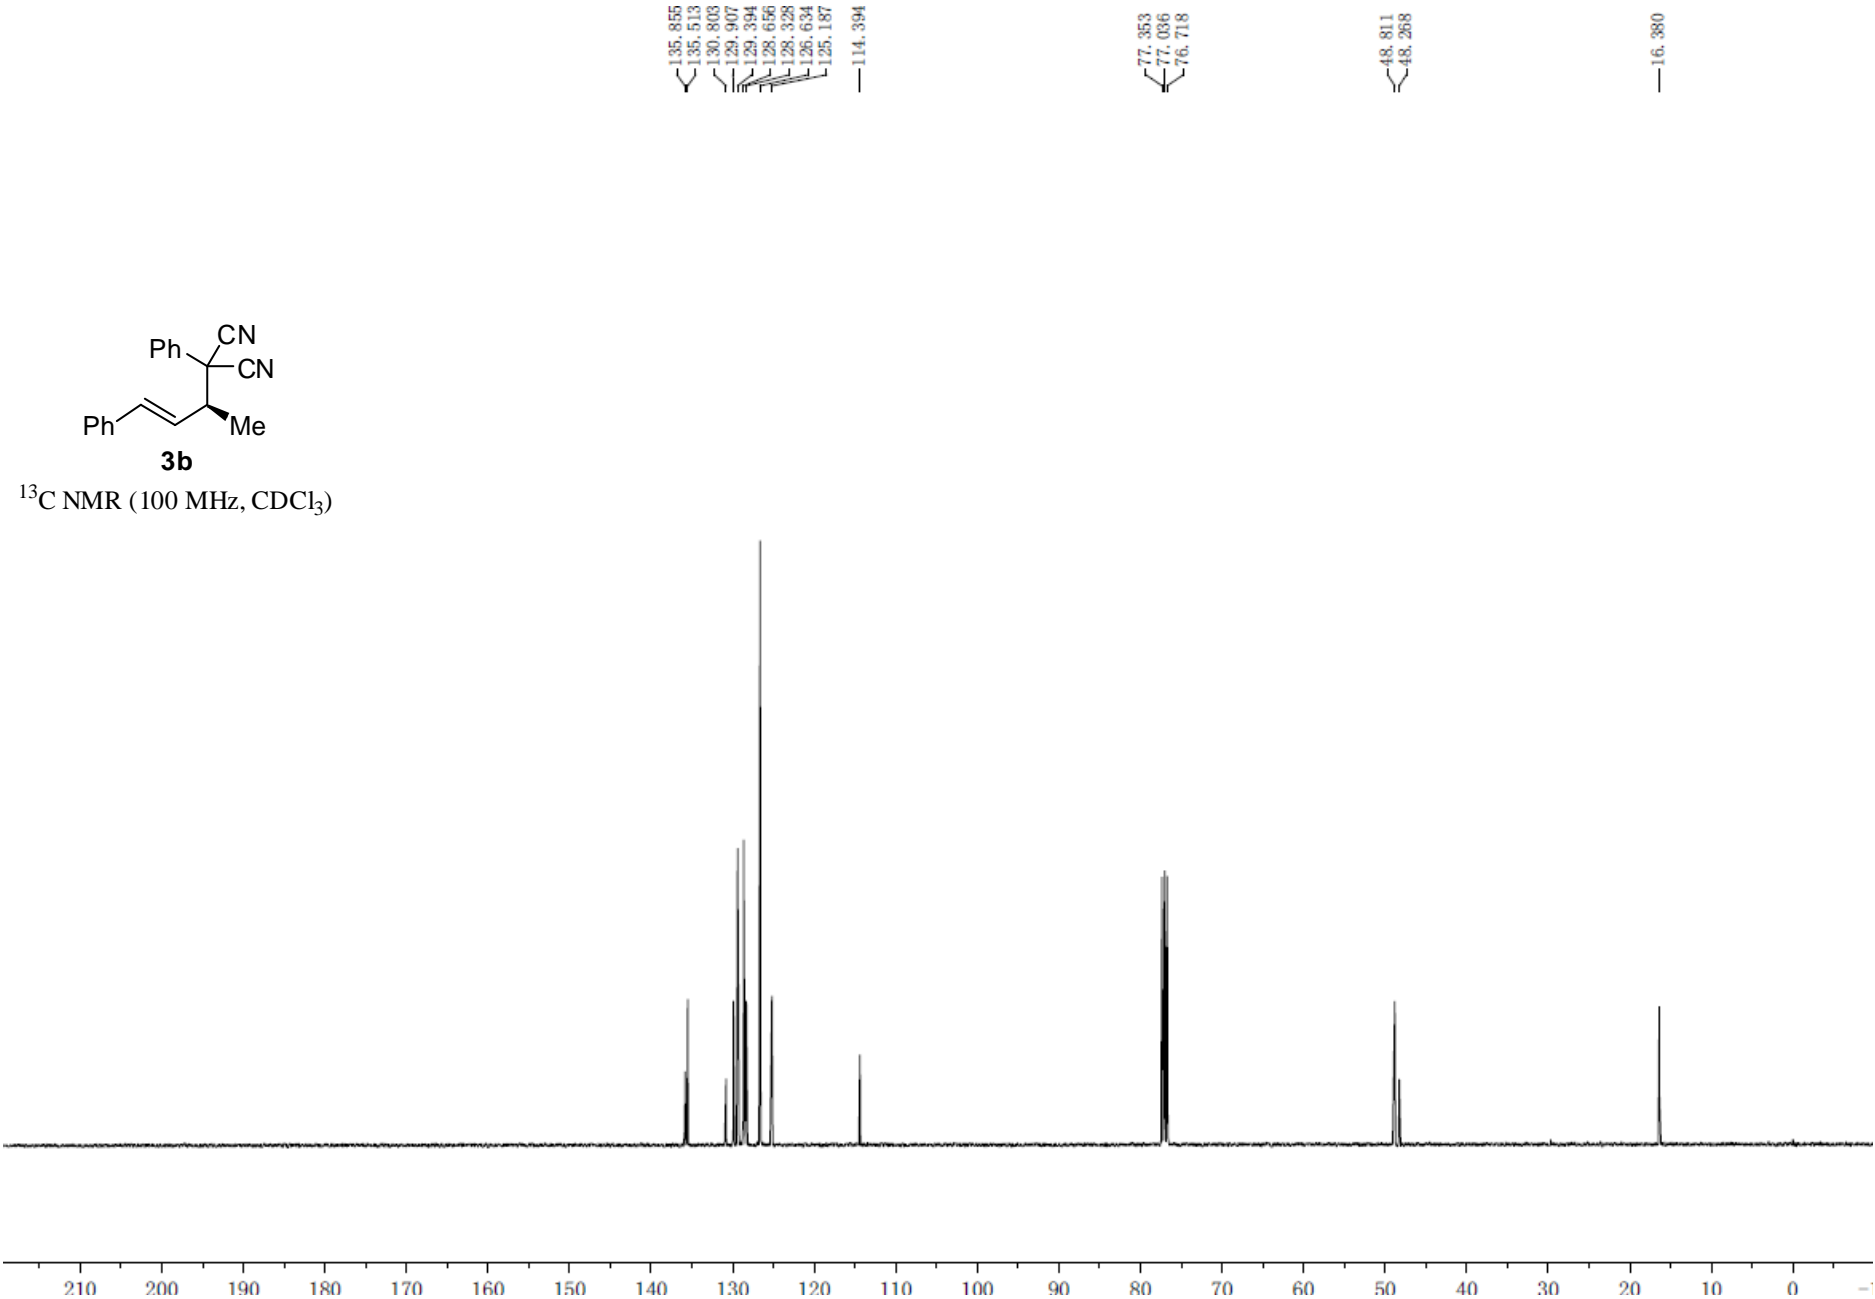

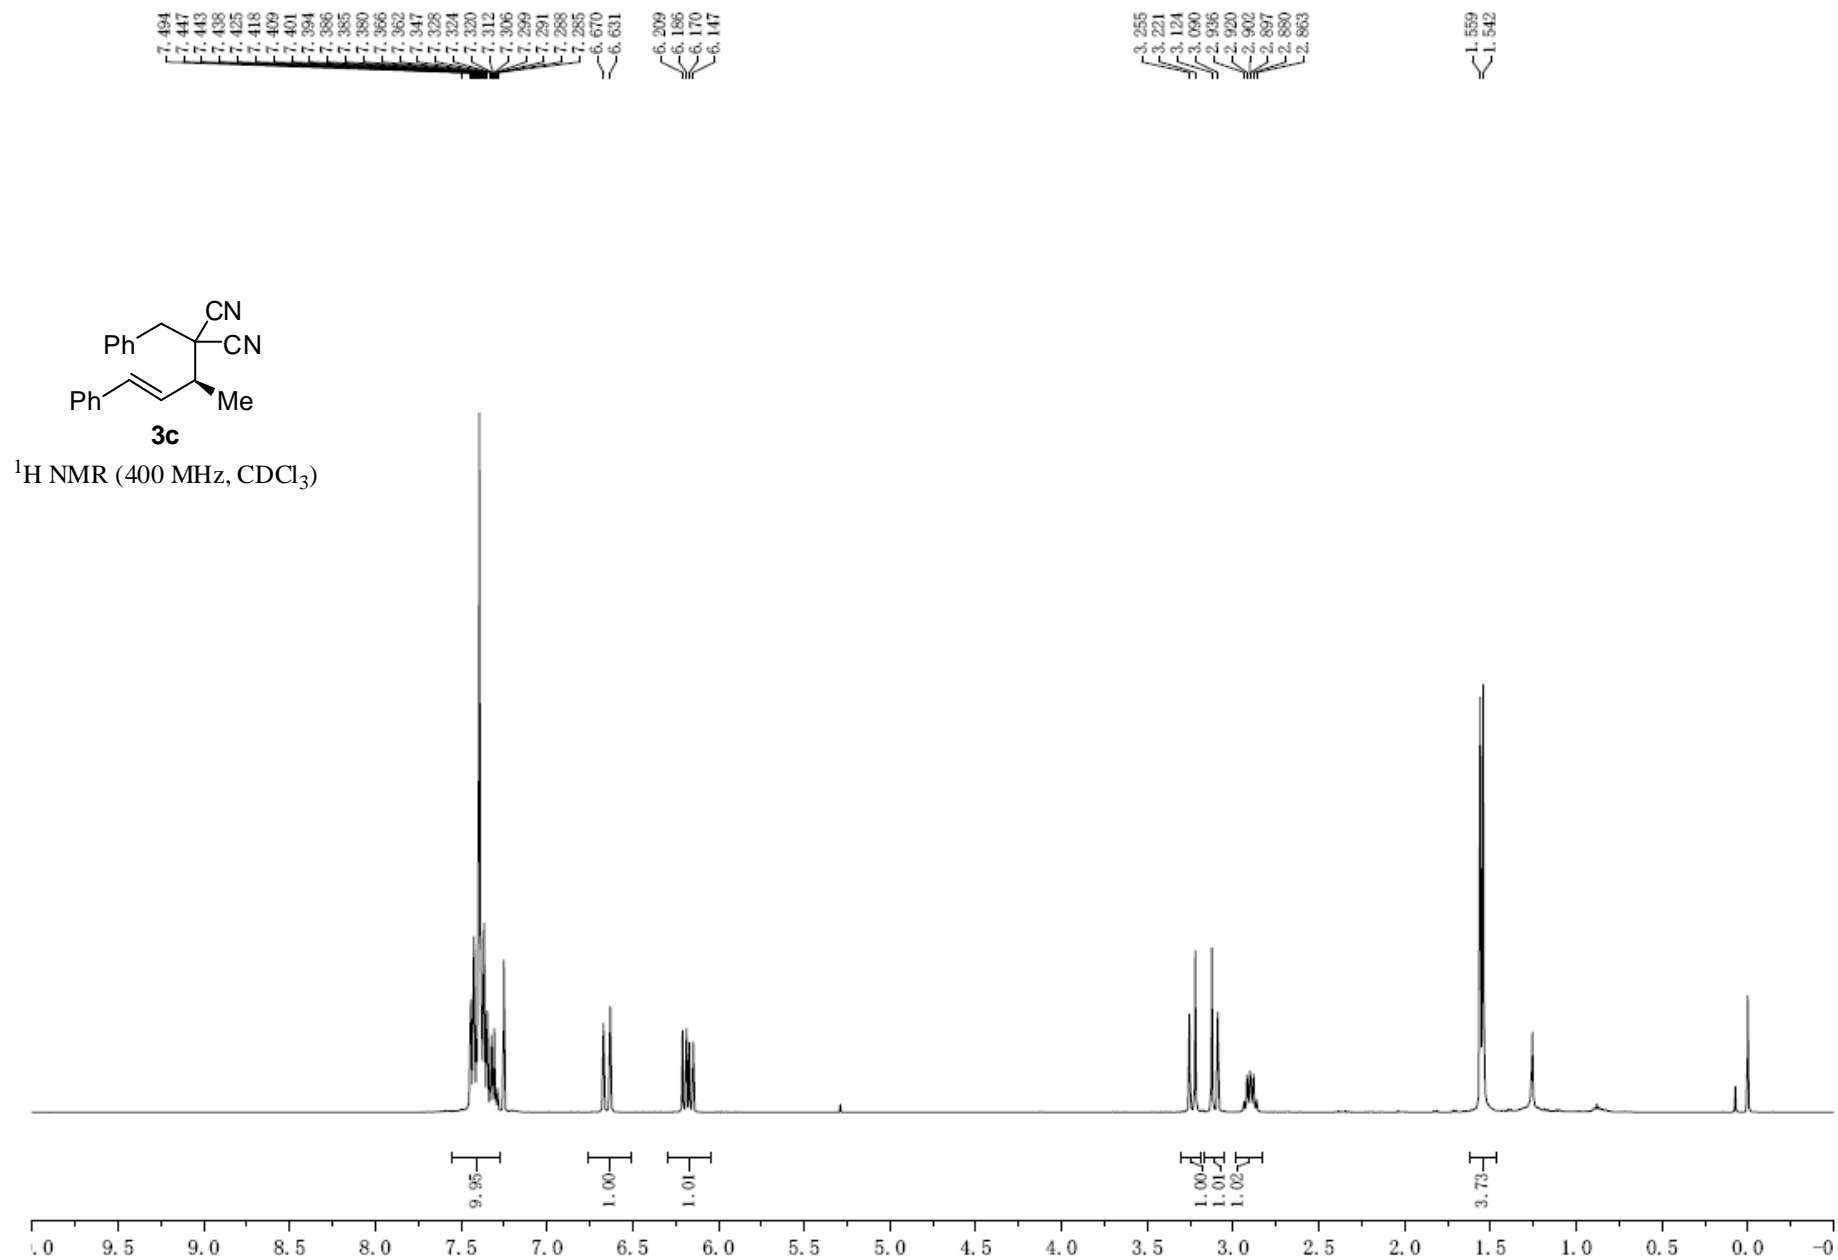

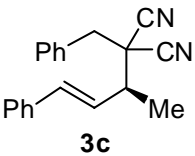

<sup>13</sup>C NMR (100 MHz, CDCl<sub>3</sub>)

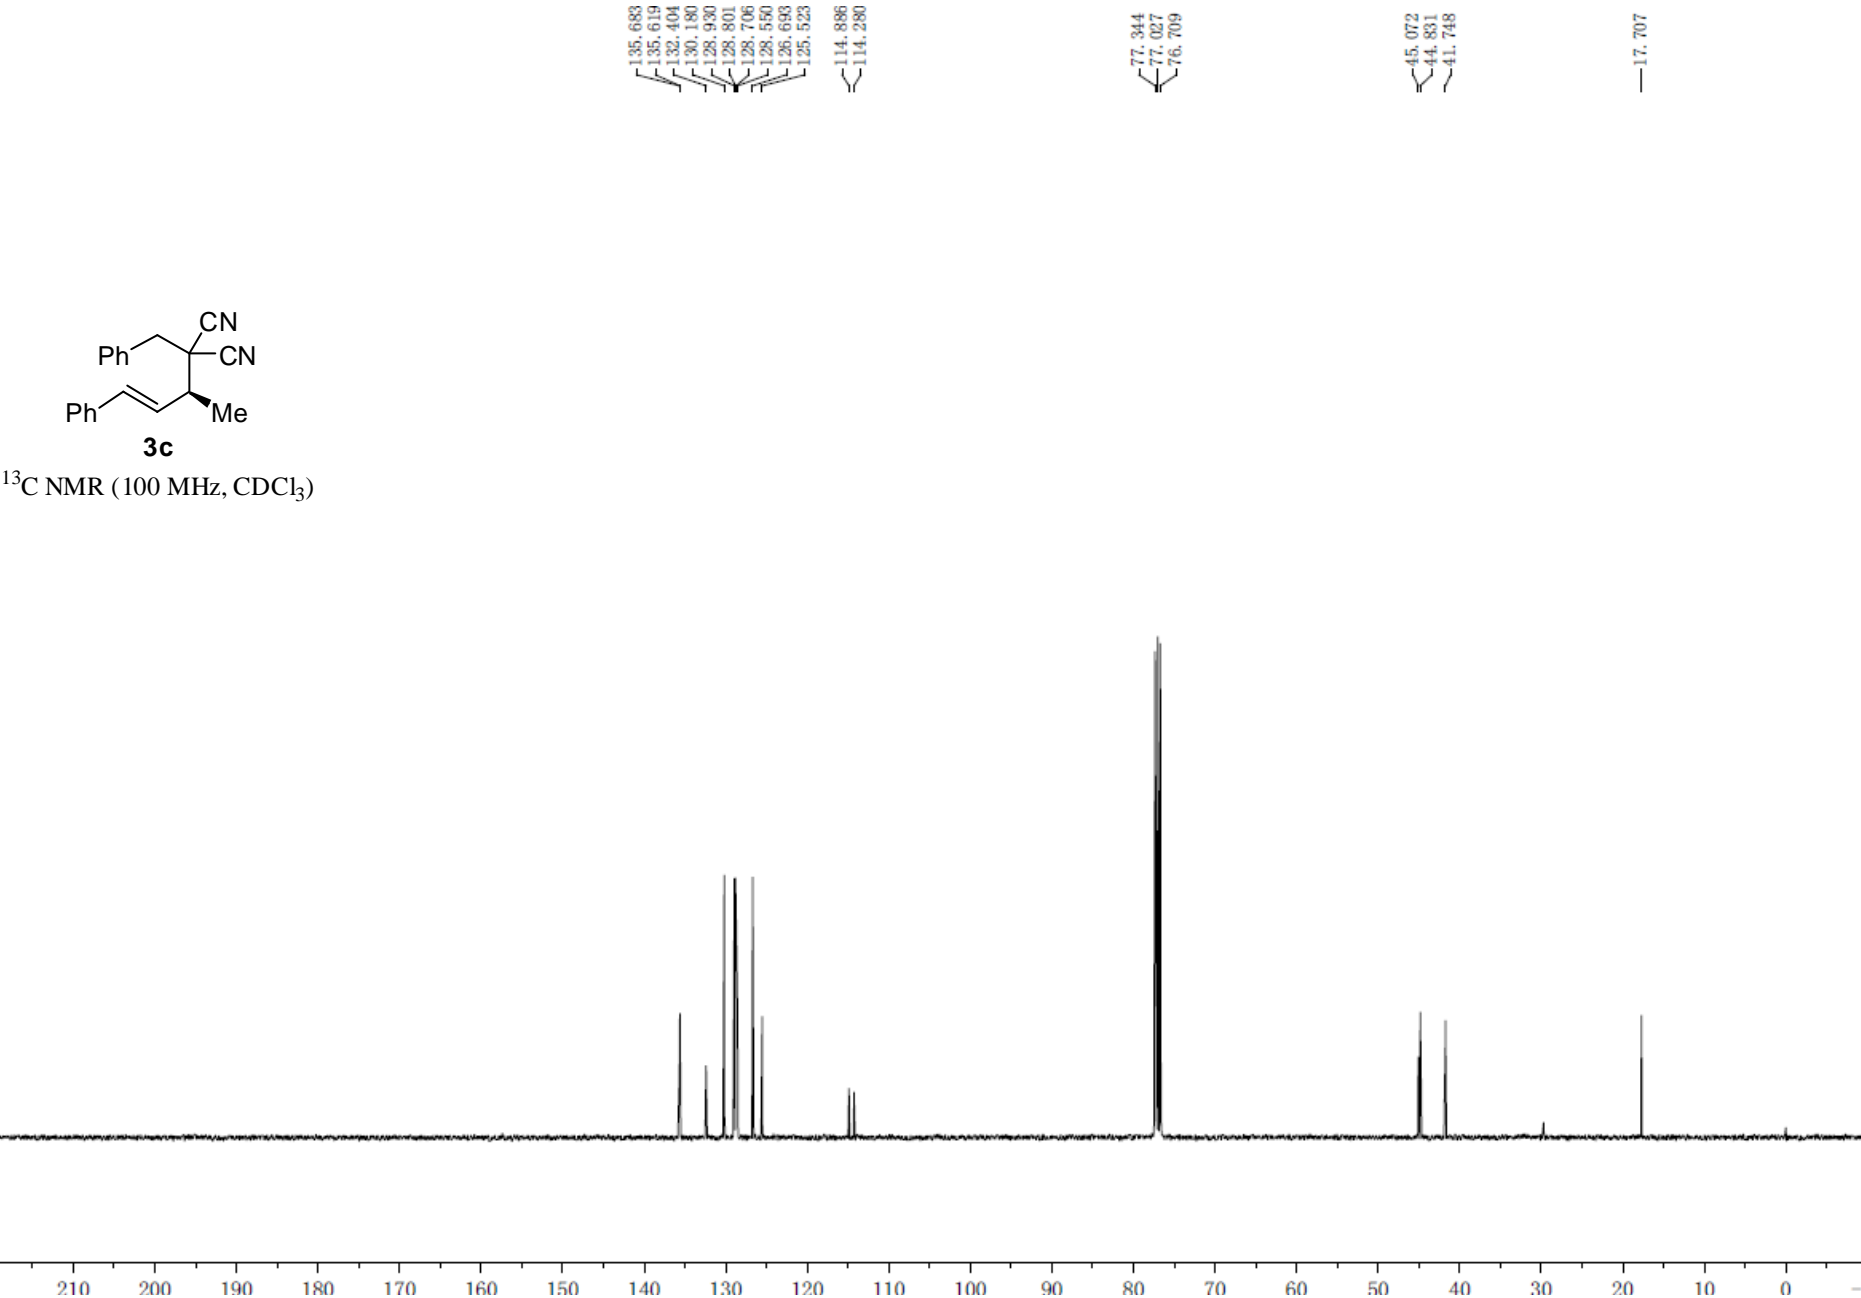

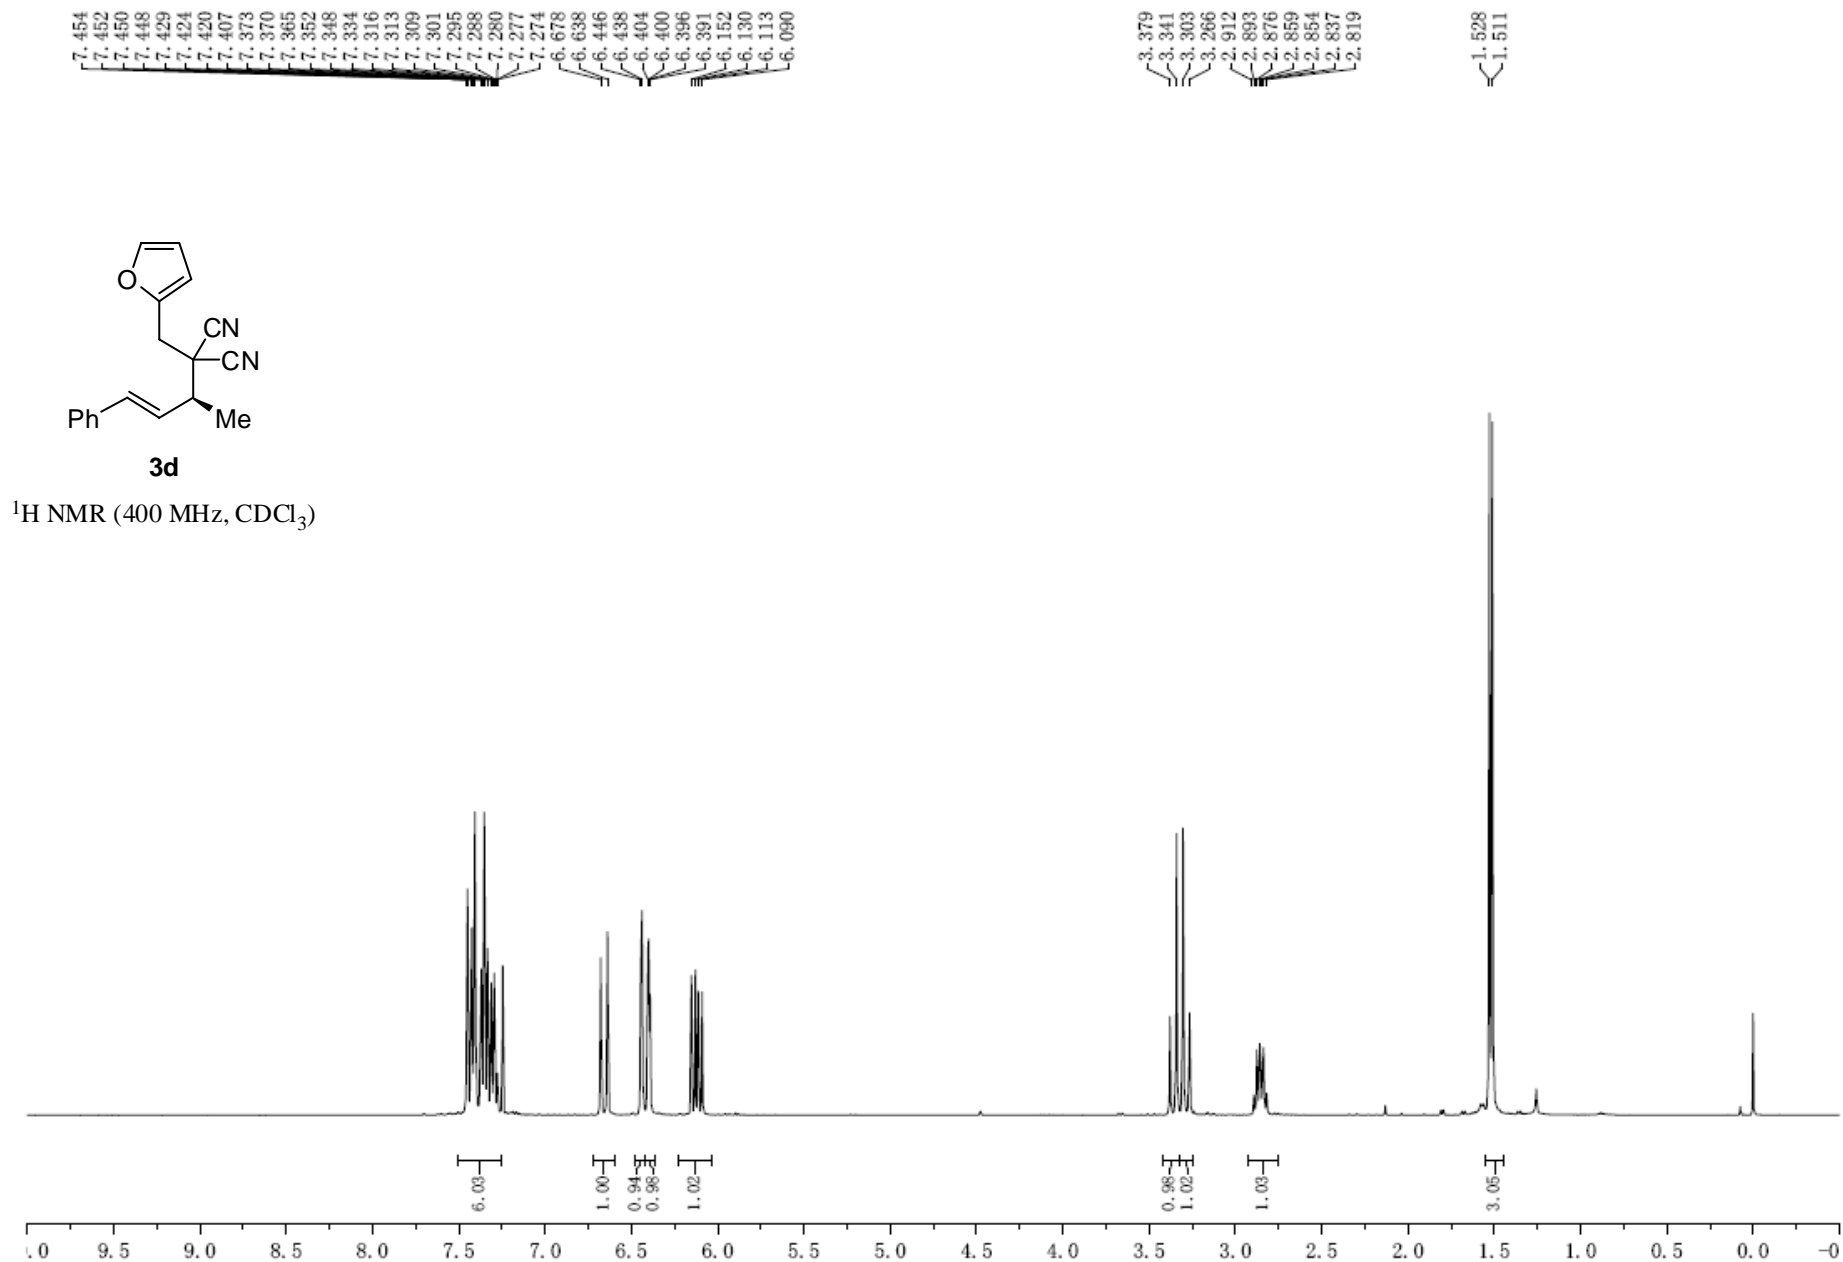

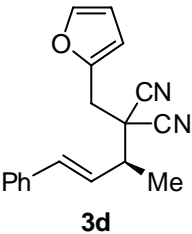

**3d**

<sup>13</sup>C NMR (100 MHz, CDCl<sub>3</sub>)

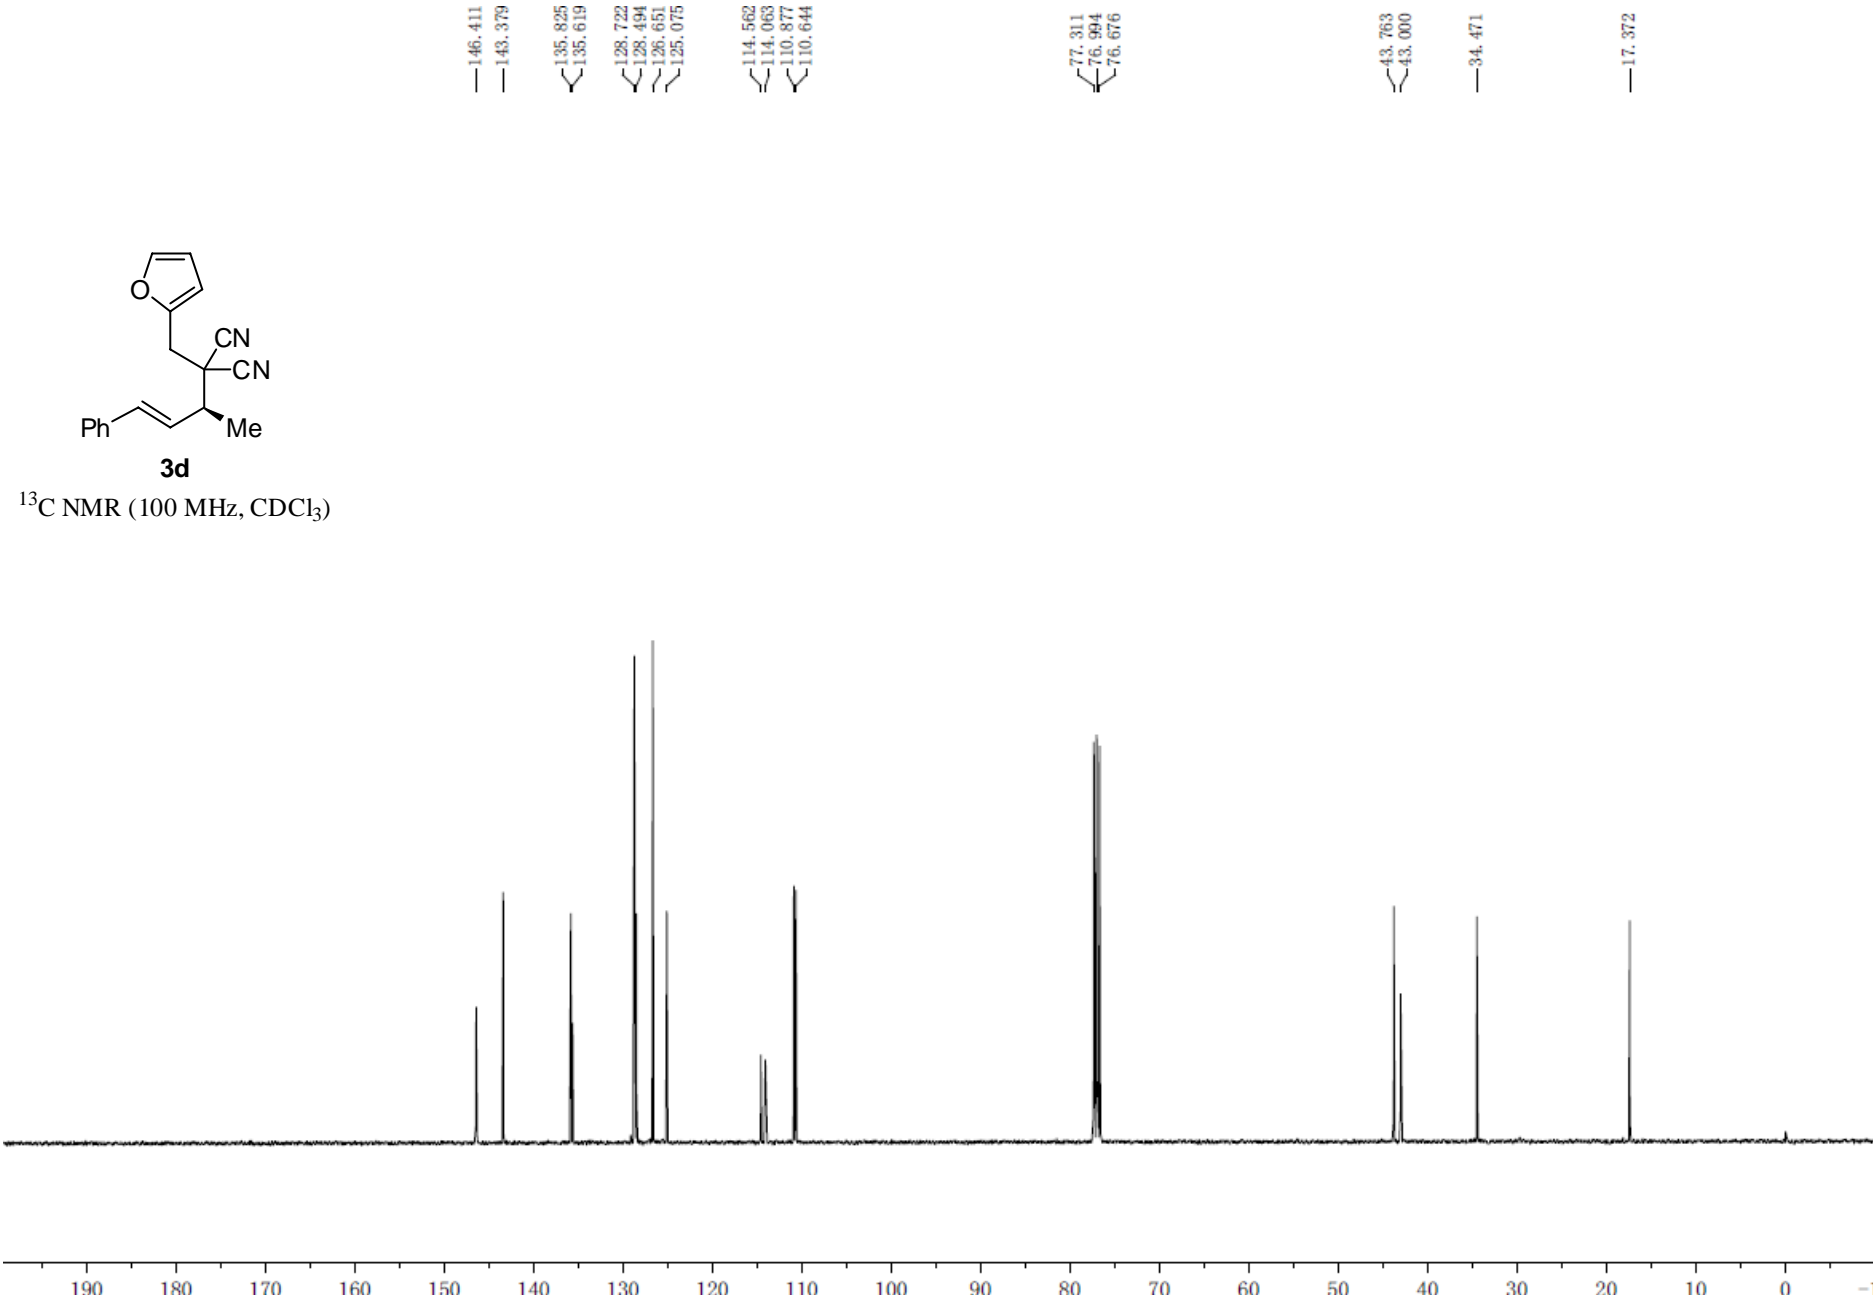

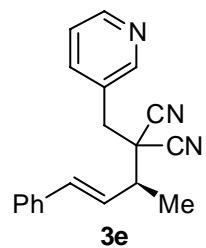

$^1\text{H}$  NMR (400 MHz,  $\text{CDCl}_3$ )

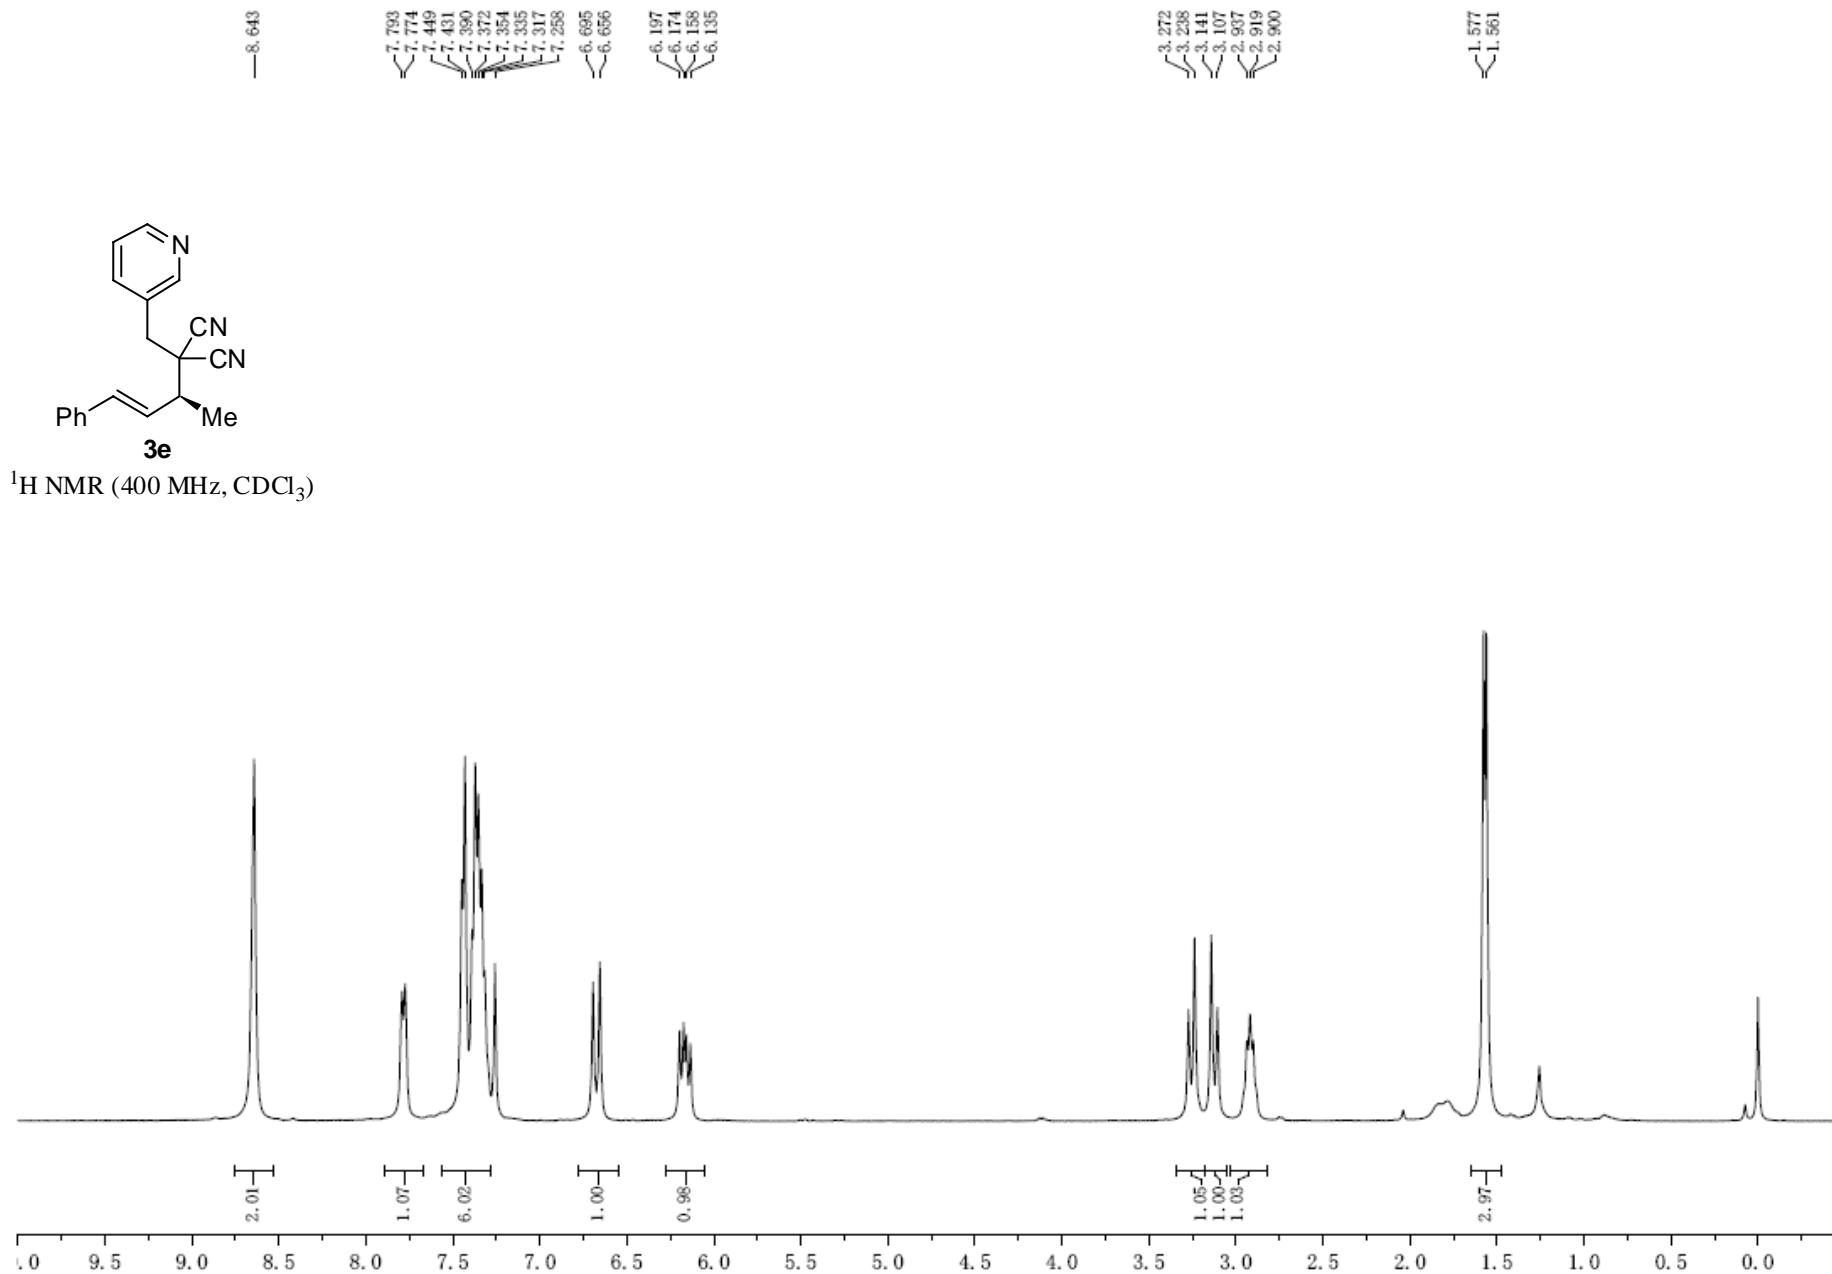

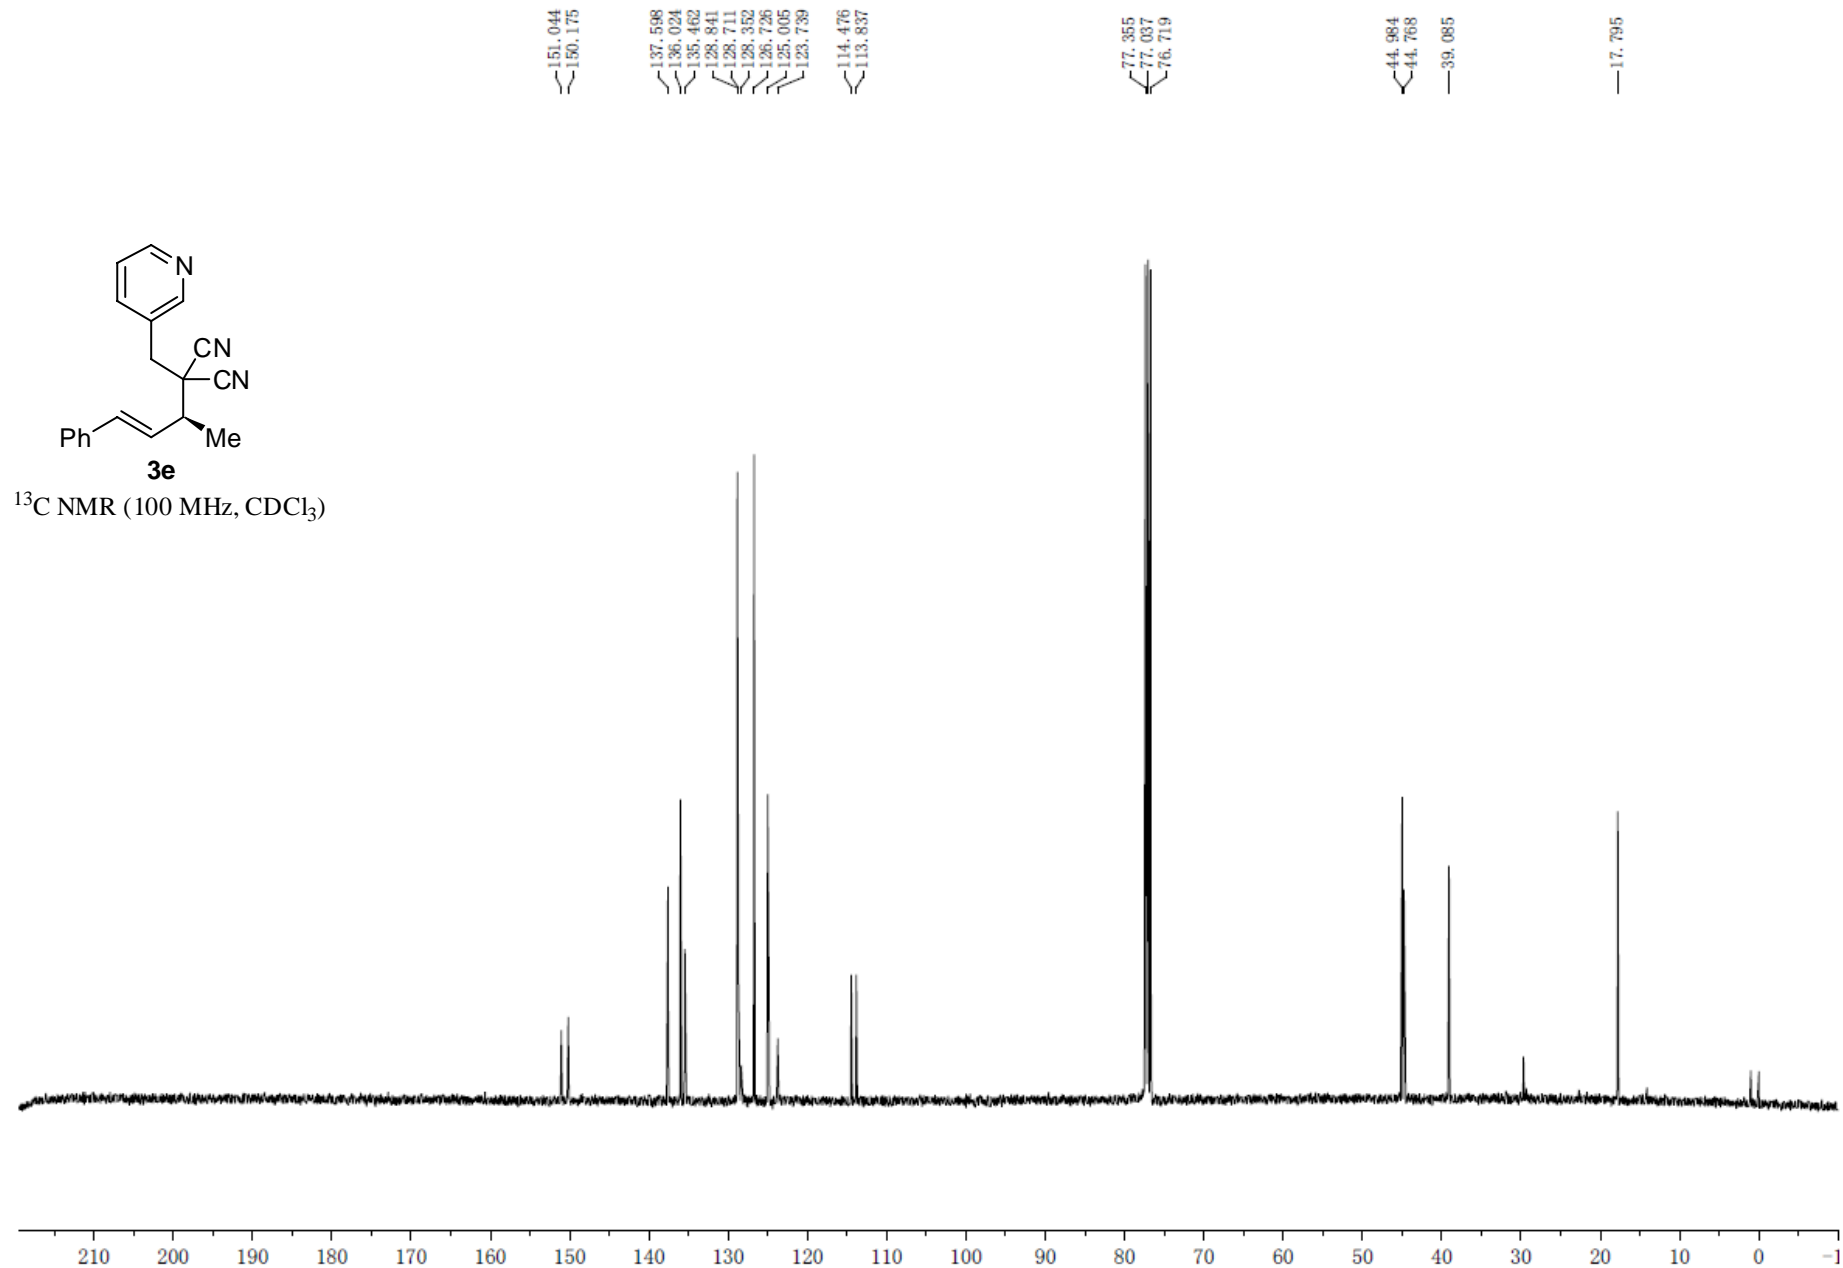

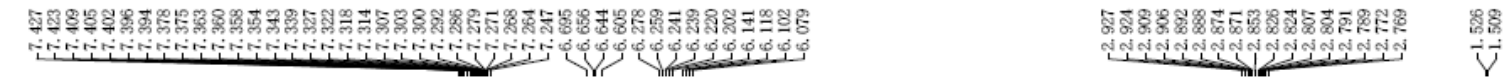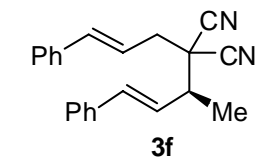

<sup>1</sup>H NMR (400 MHz, CDCl<sub>3</sub>)

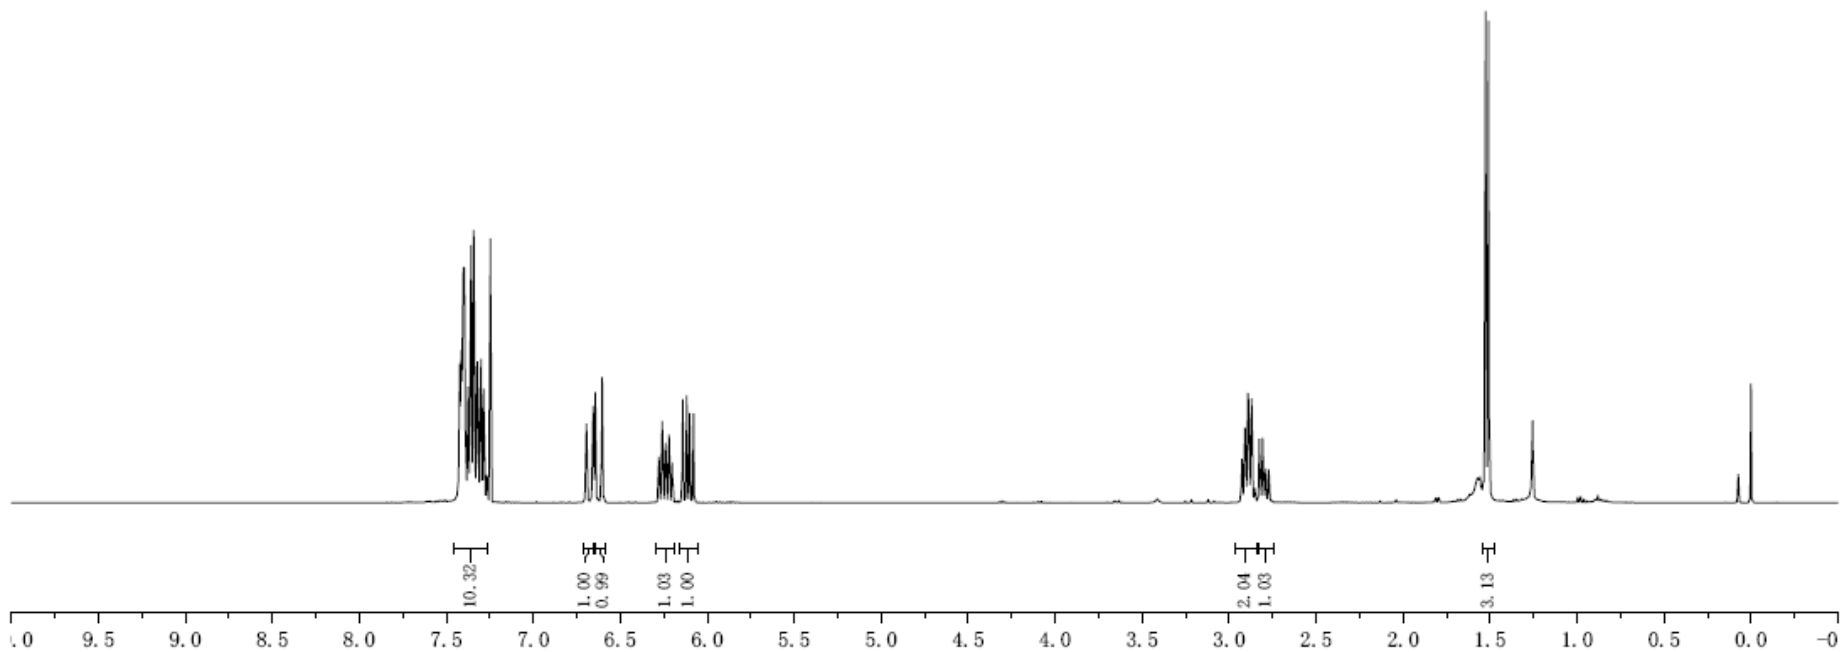



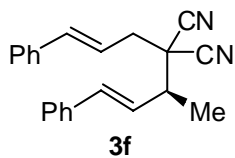

<sup>13</sup>C NMR (100 MHz, CDCl<sub>3</sub>)

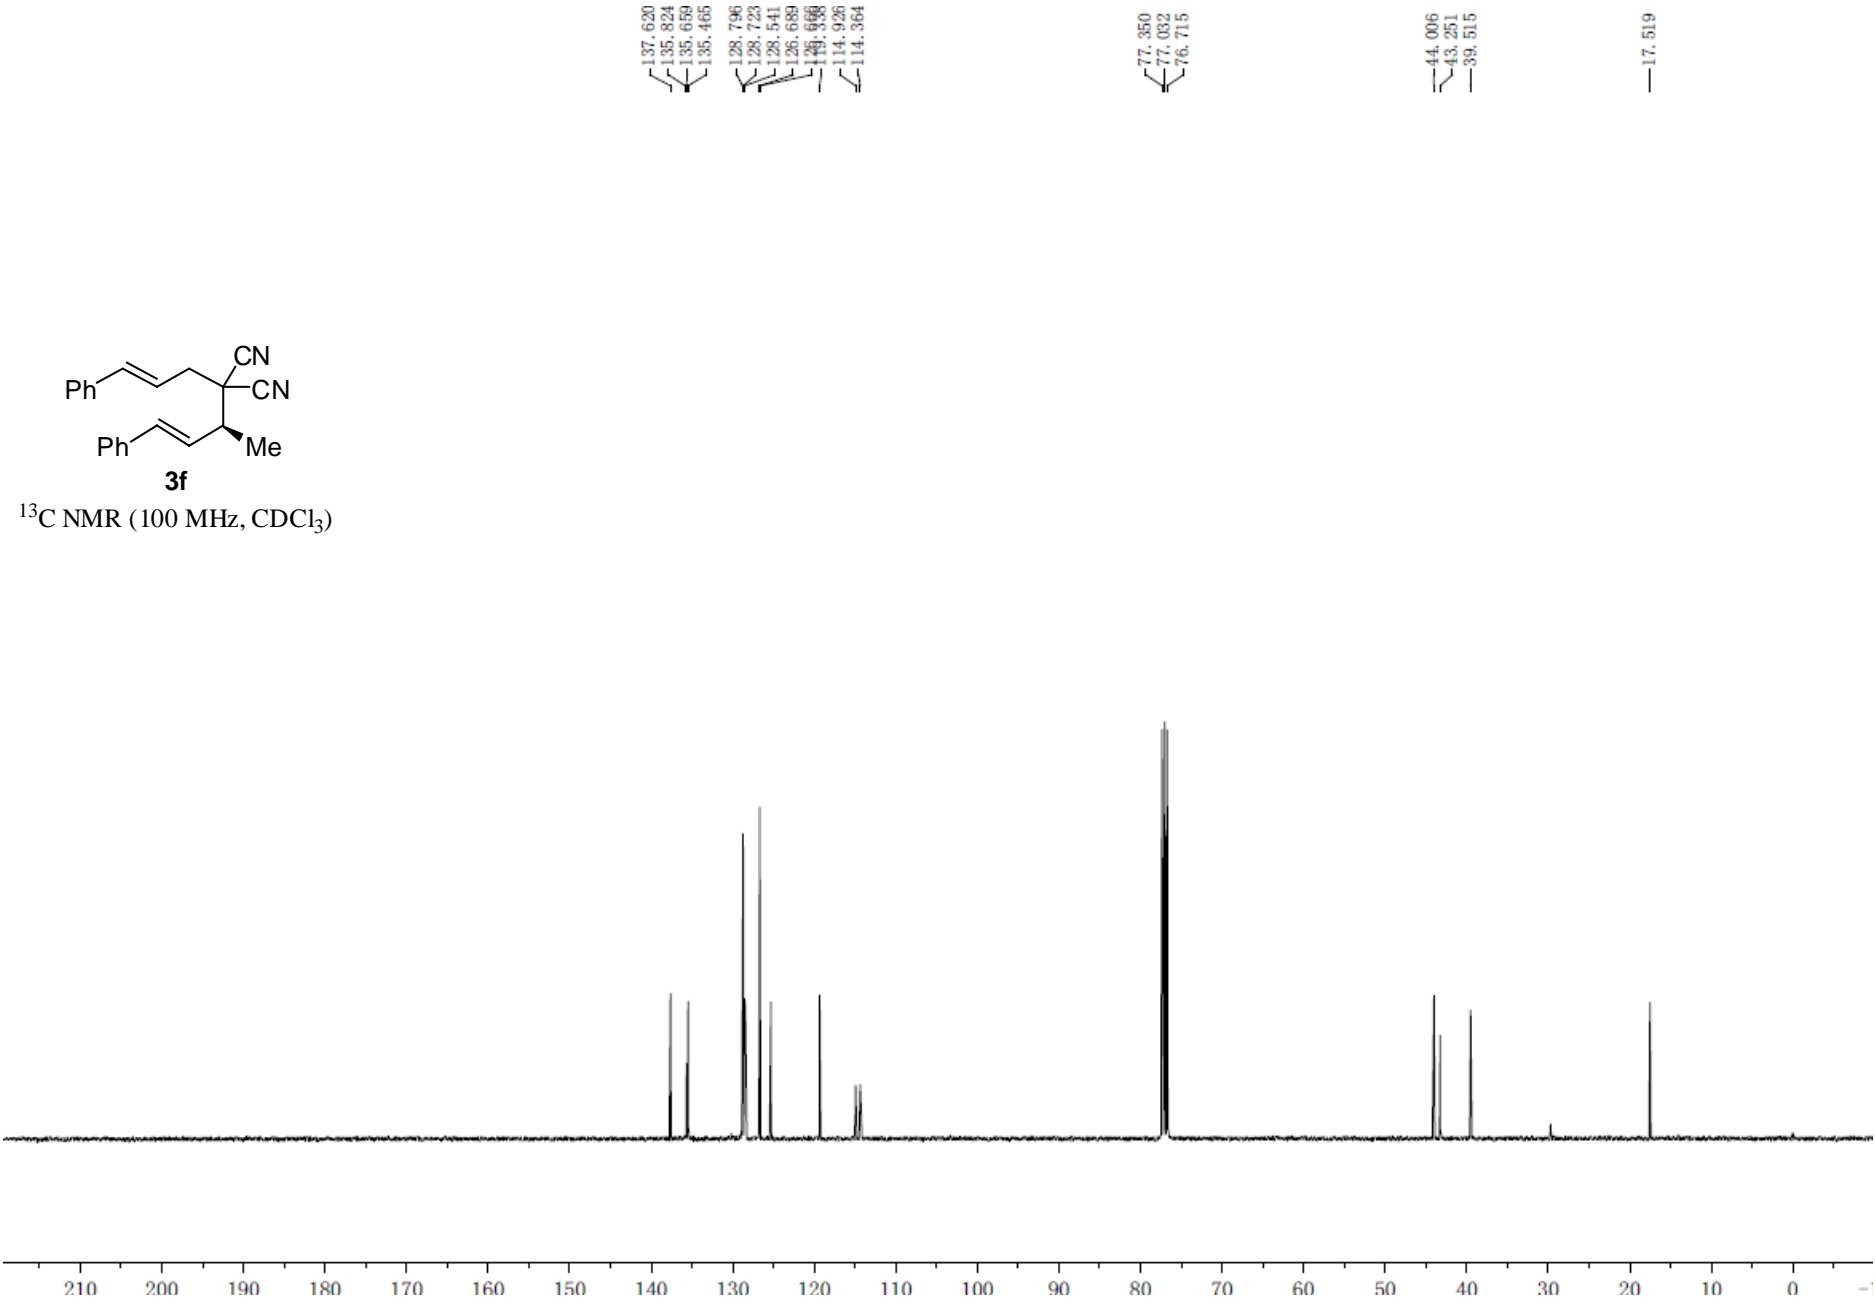

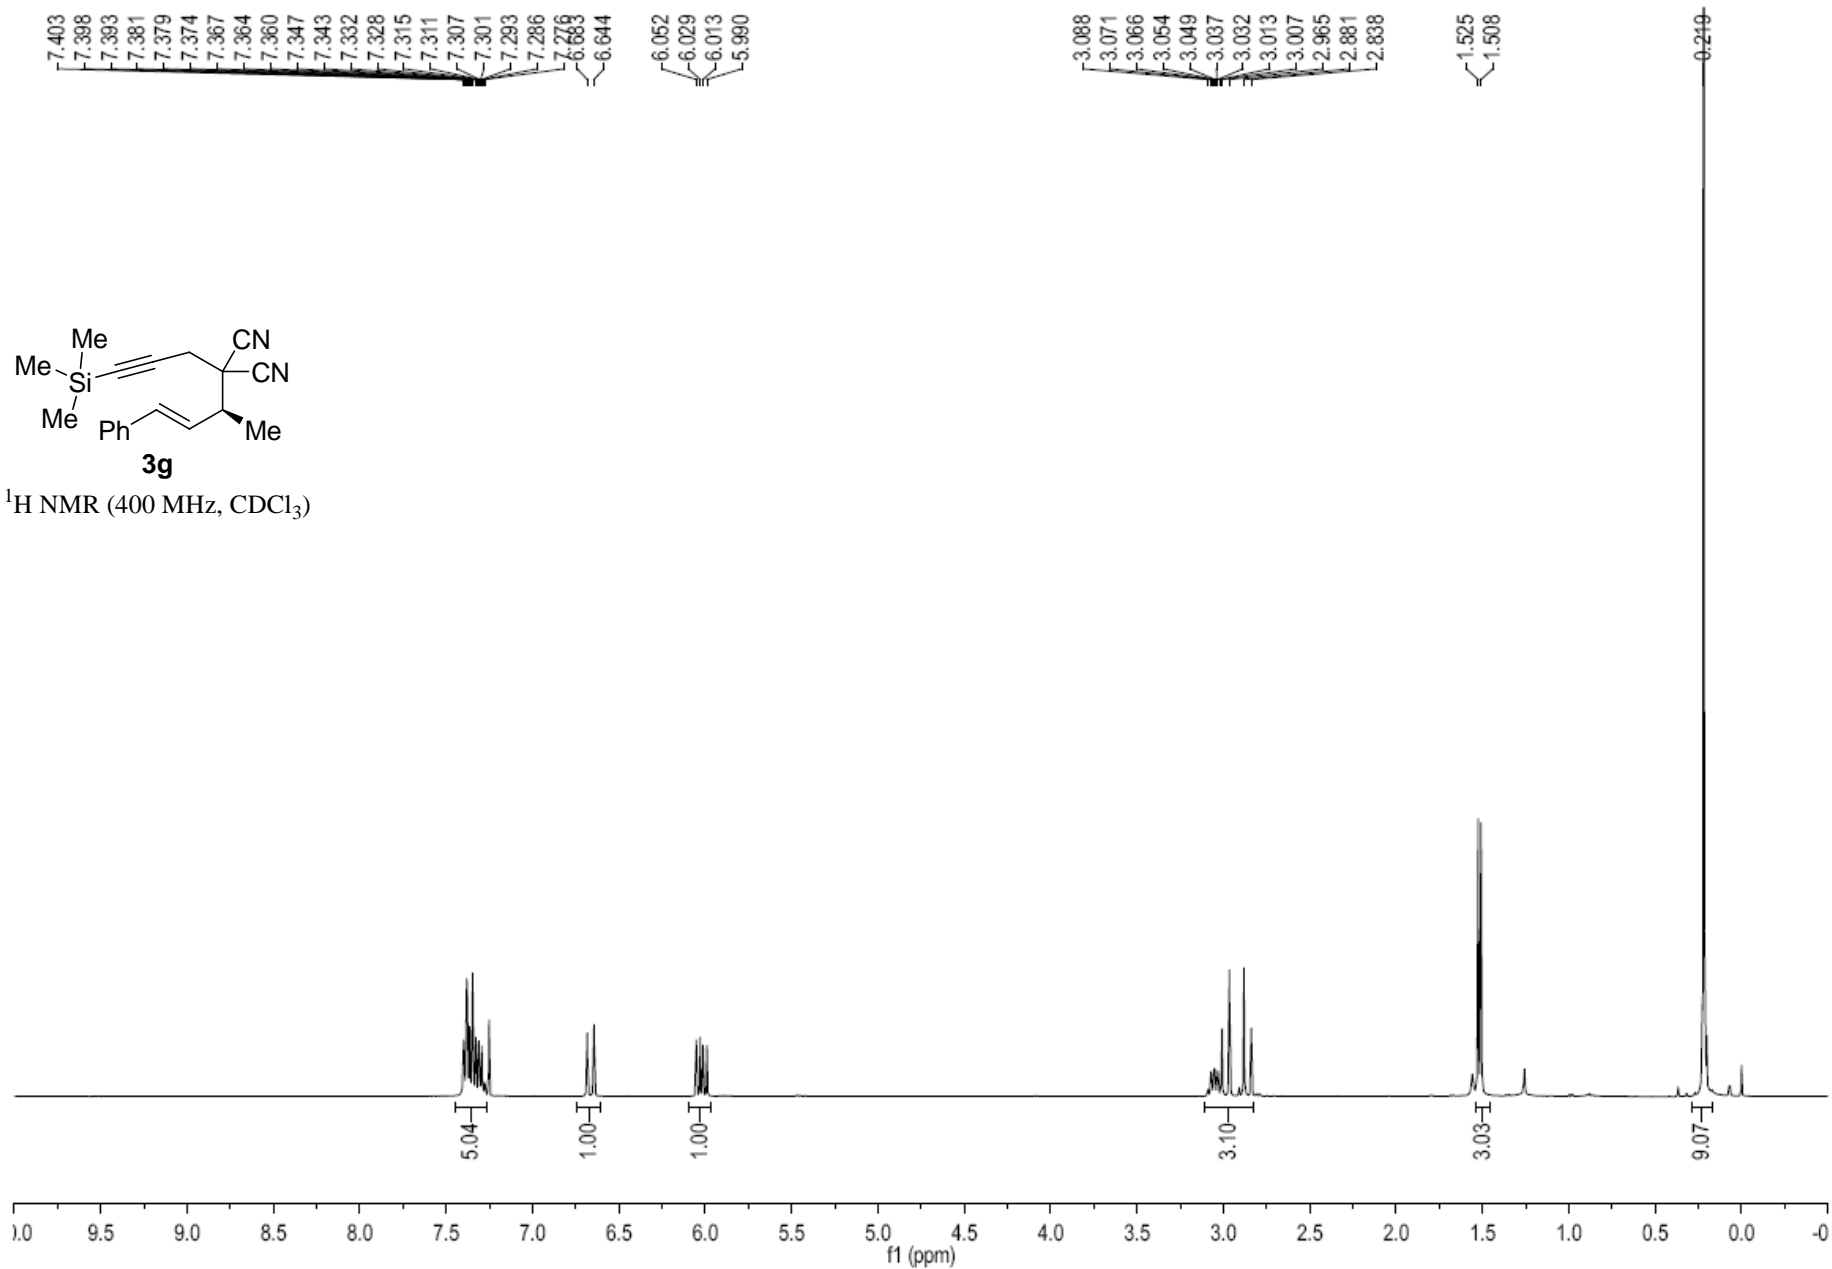

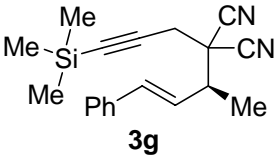

<sup>13</sup>C NMR (100 MHz, CDCl<sub>3</sub>)

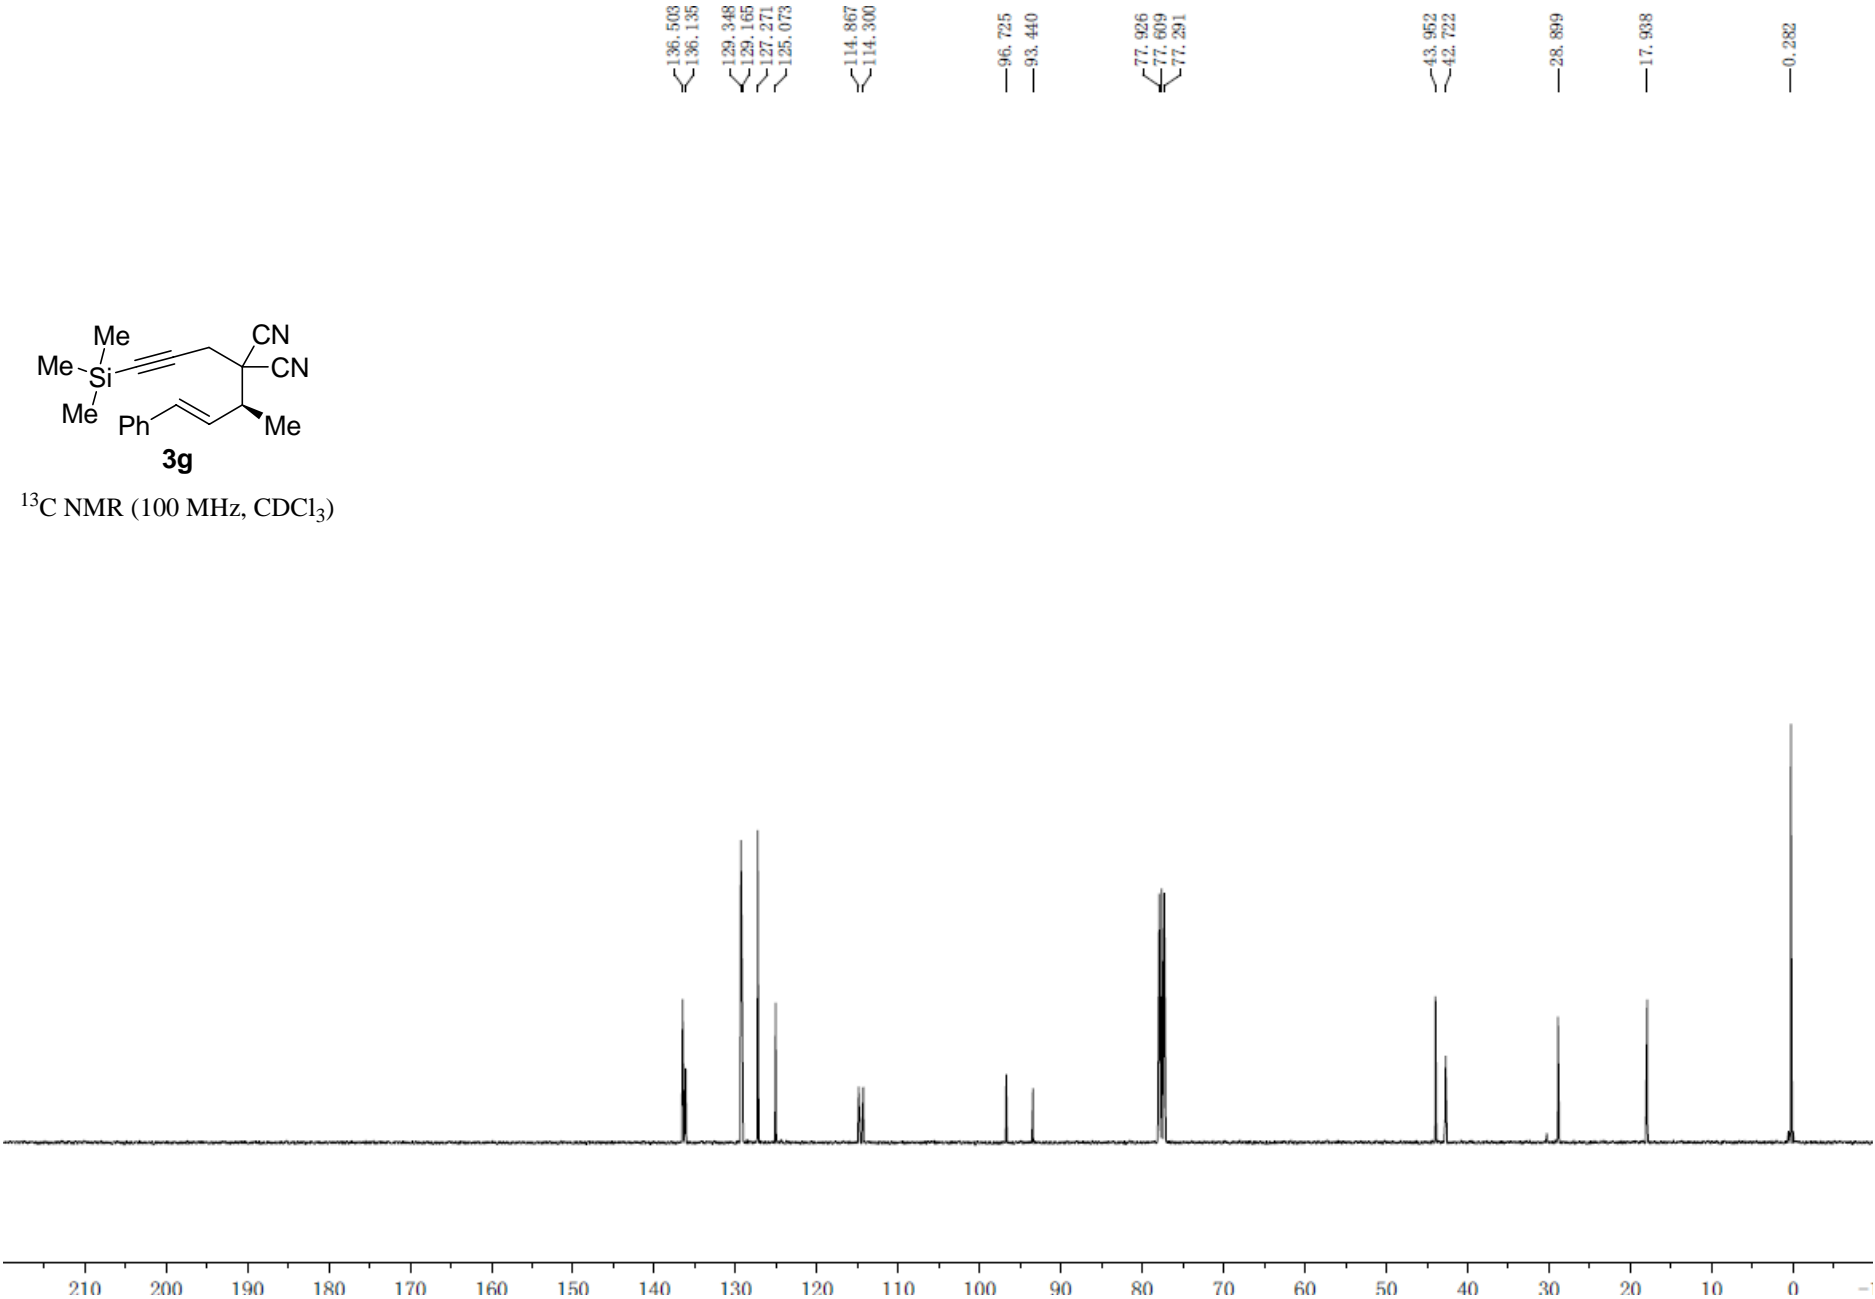

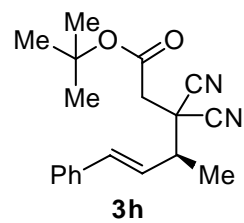

$^1\text{H}$  NMR (400 MHz,  $\text{CDCl}_3$ )

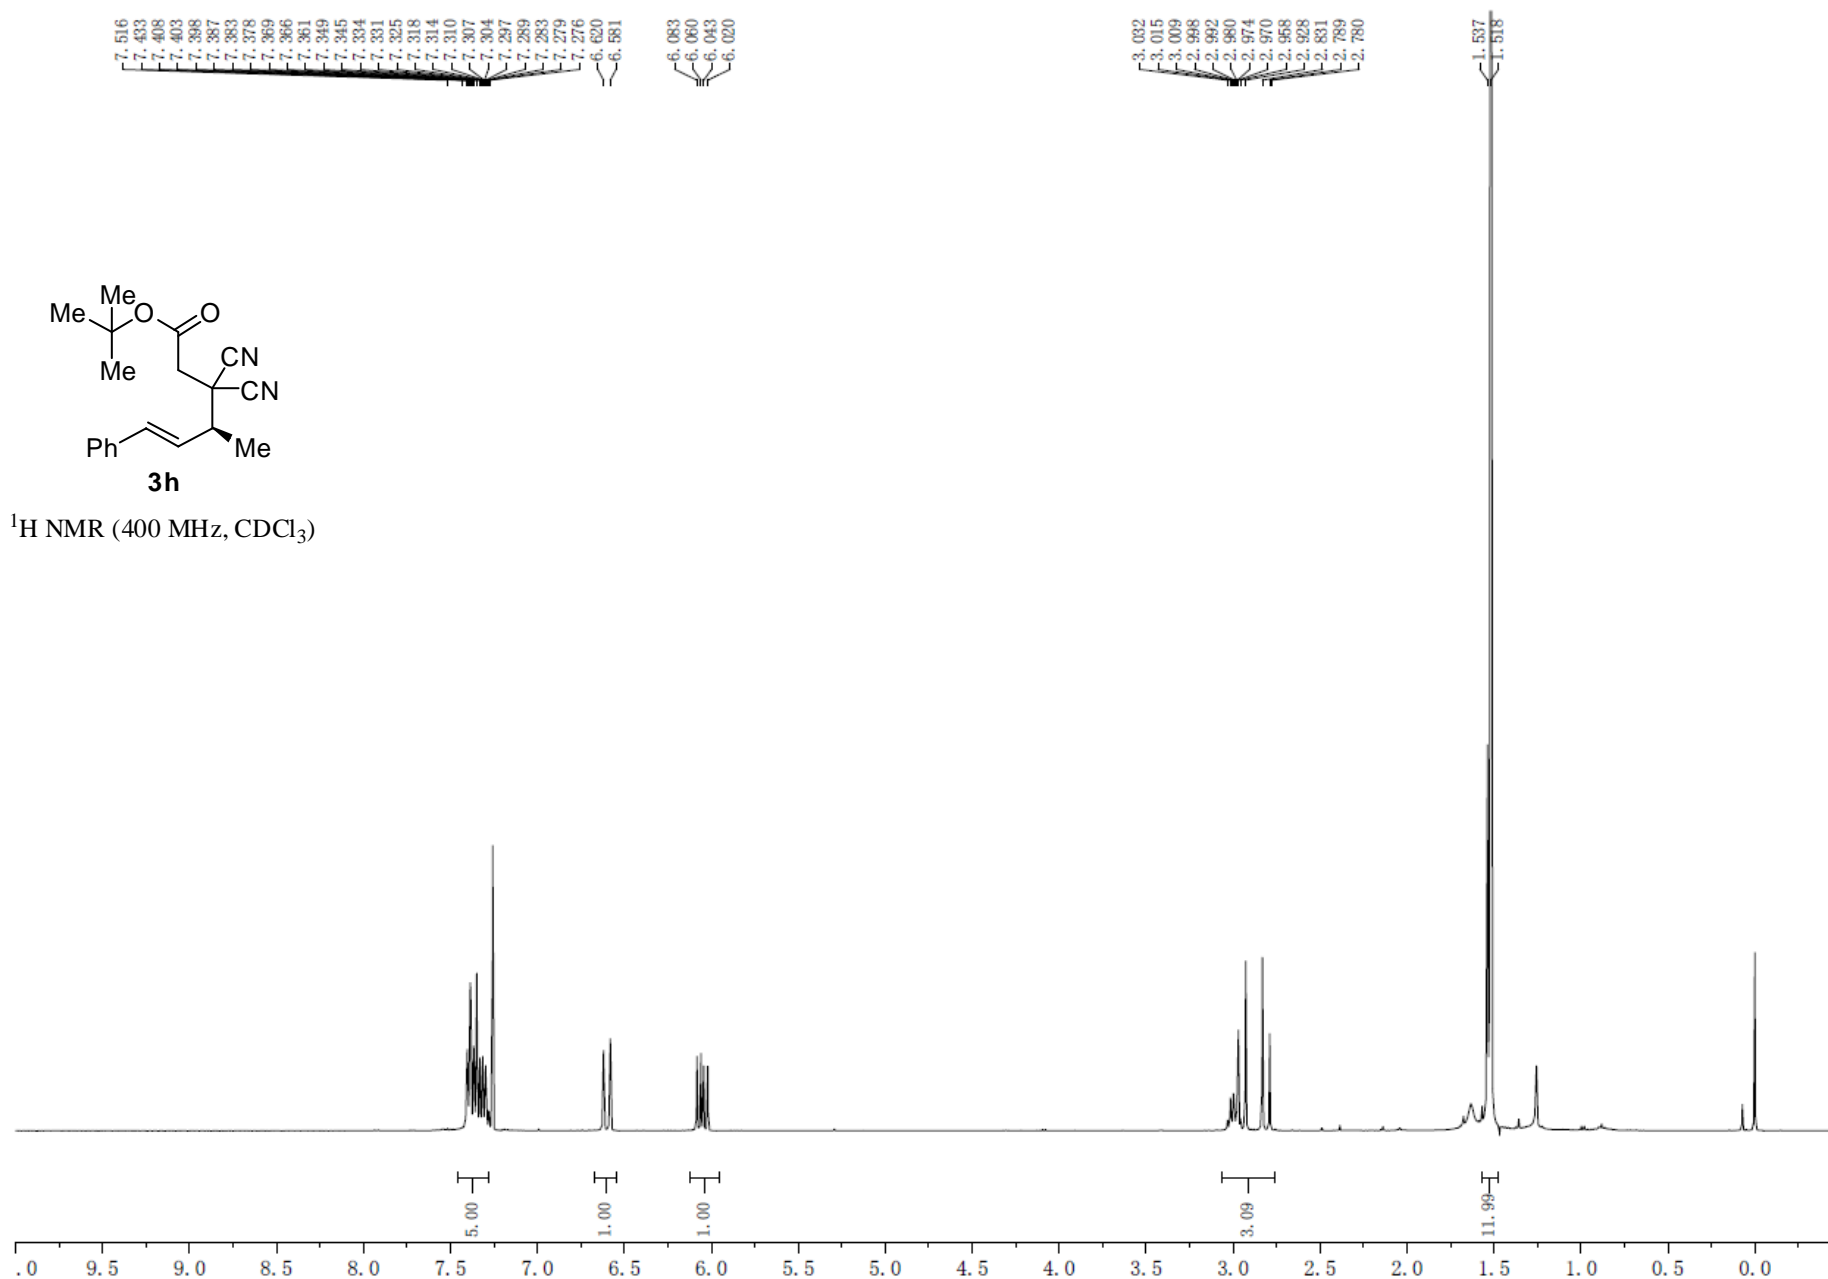

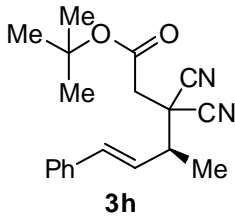

<sup>13</sup>C NMR (100 MHz, CDCl<sub>3</sub>)

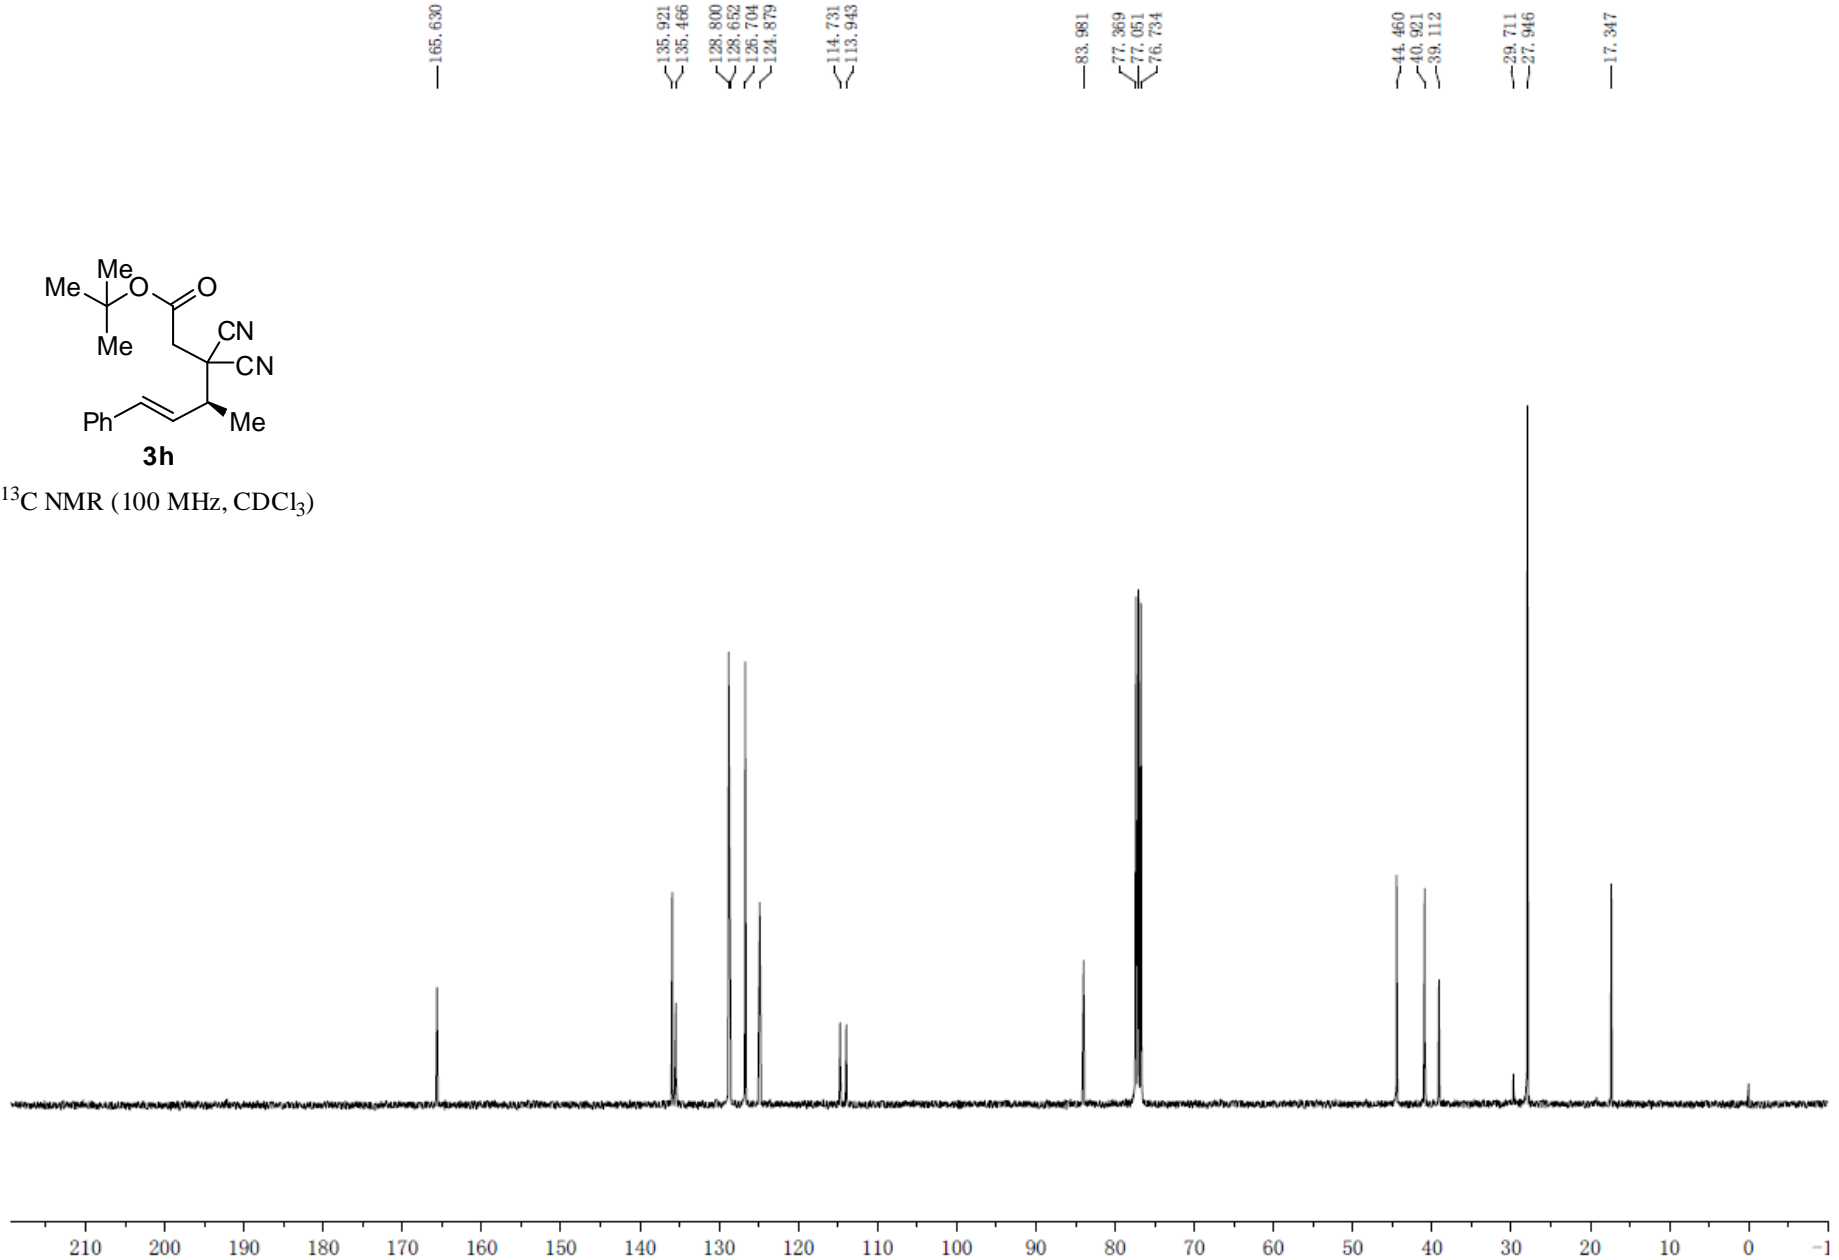

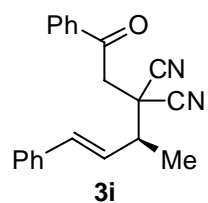

$^1\text{H}$  NMR (400 MHz,  $\text{CDCl}_3$ )

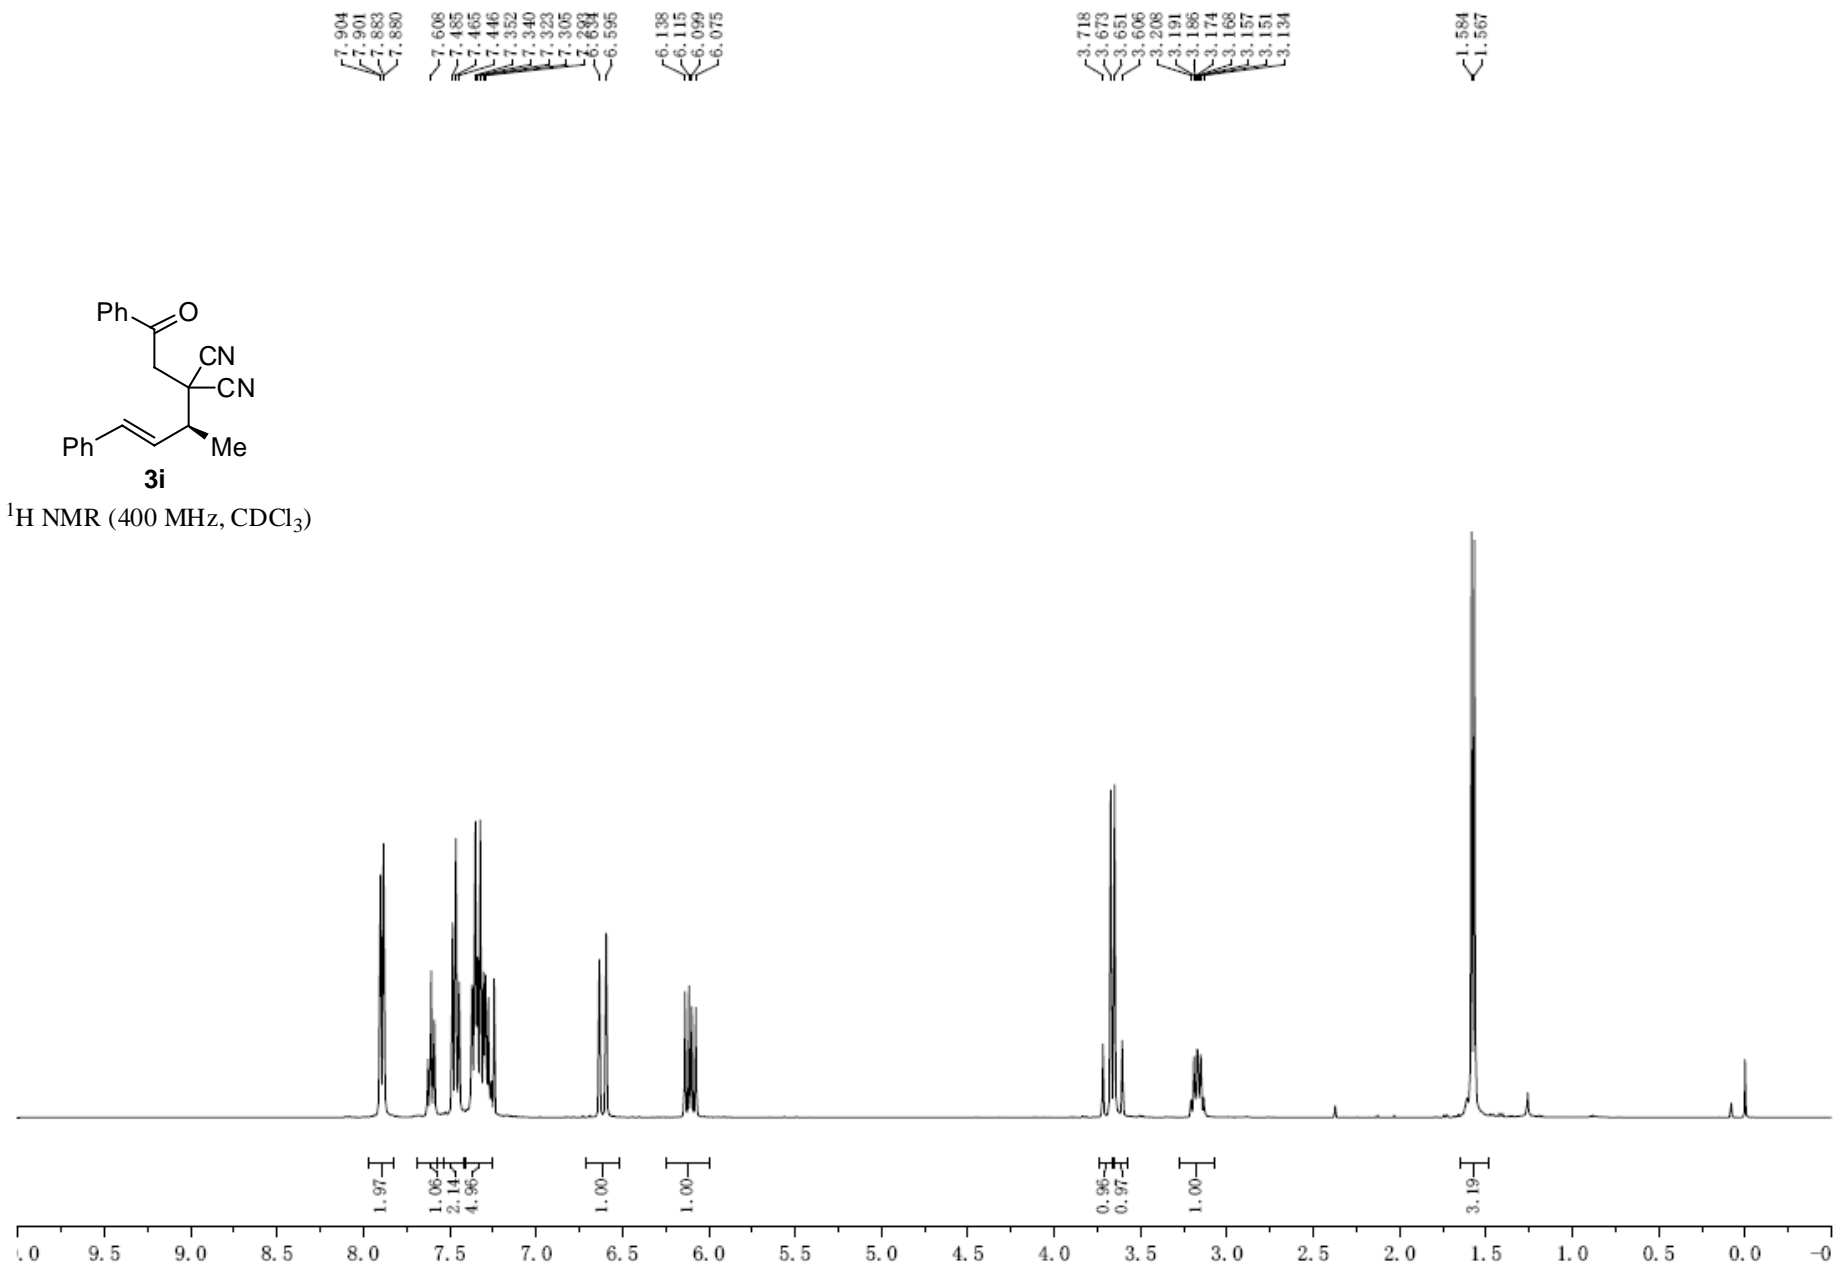

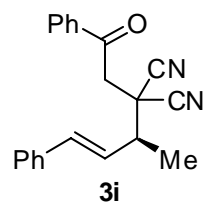

$^{13}\text{C}$  NMR (100 MHz,  $\text{CDCl}_3$ )

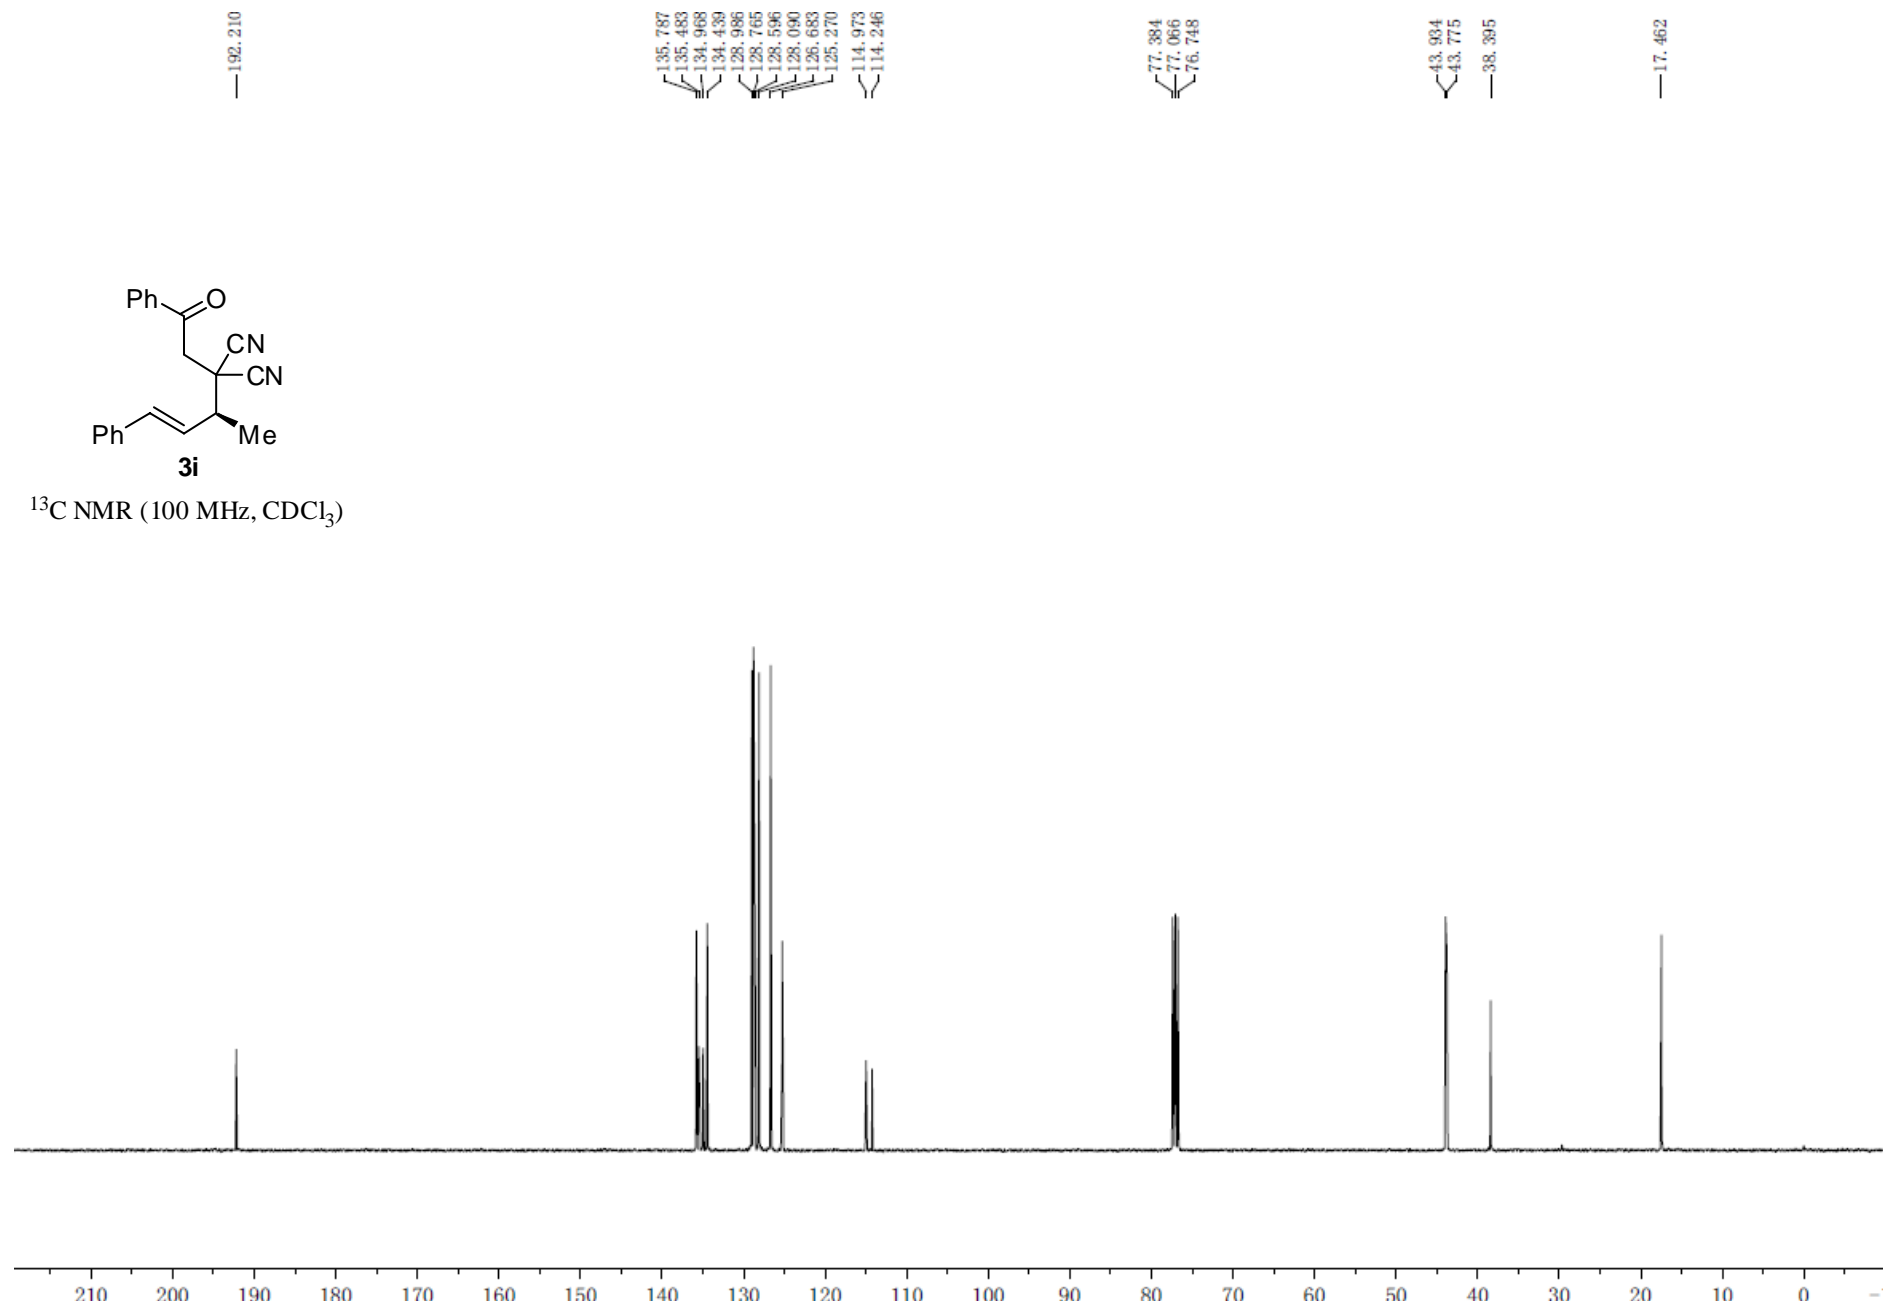

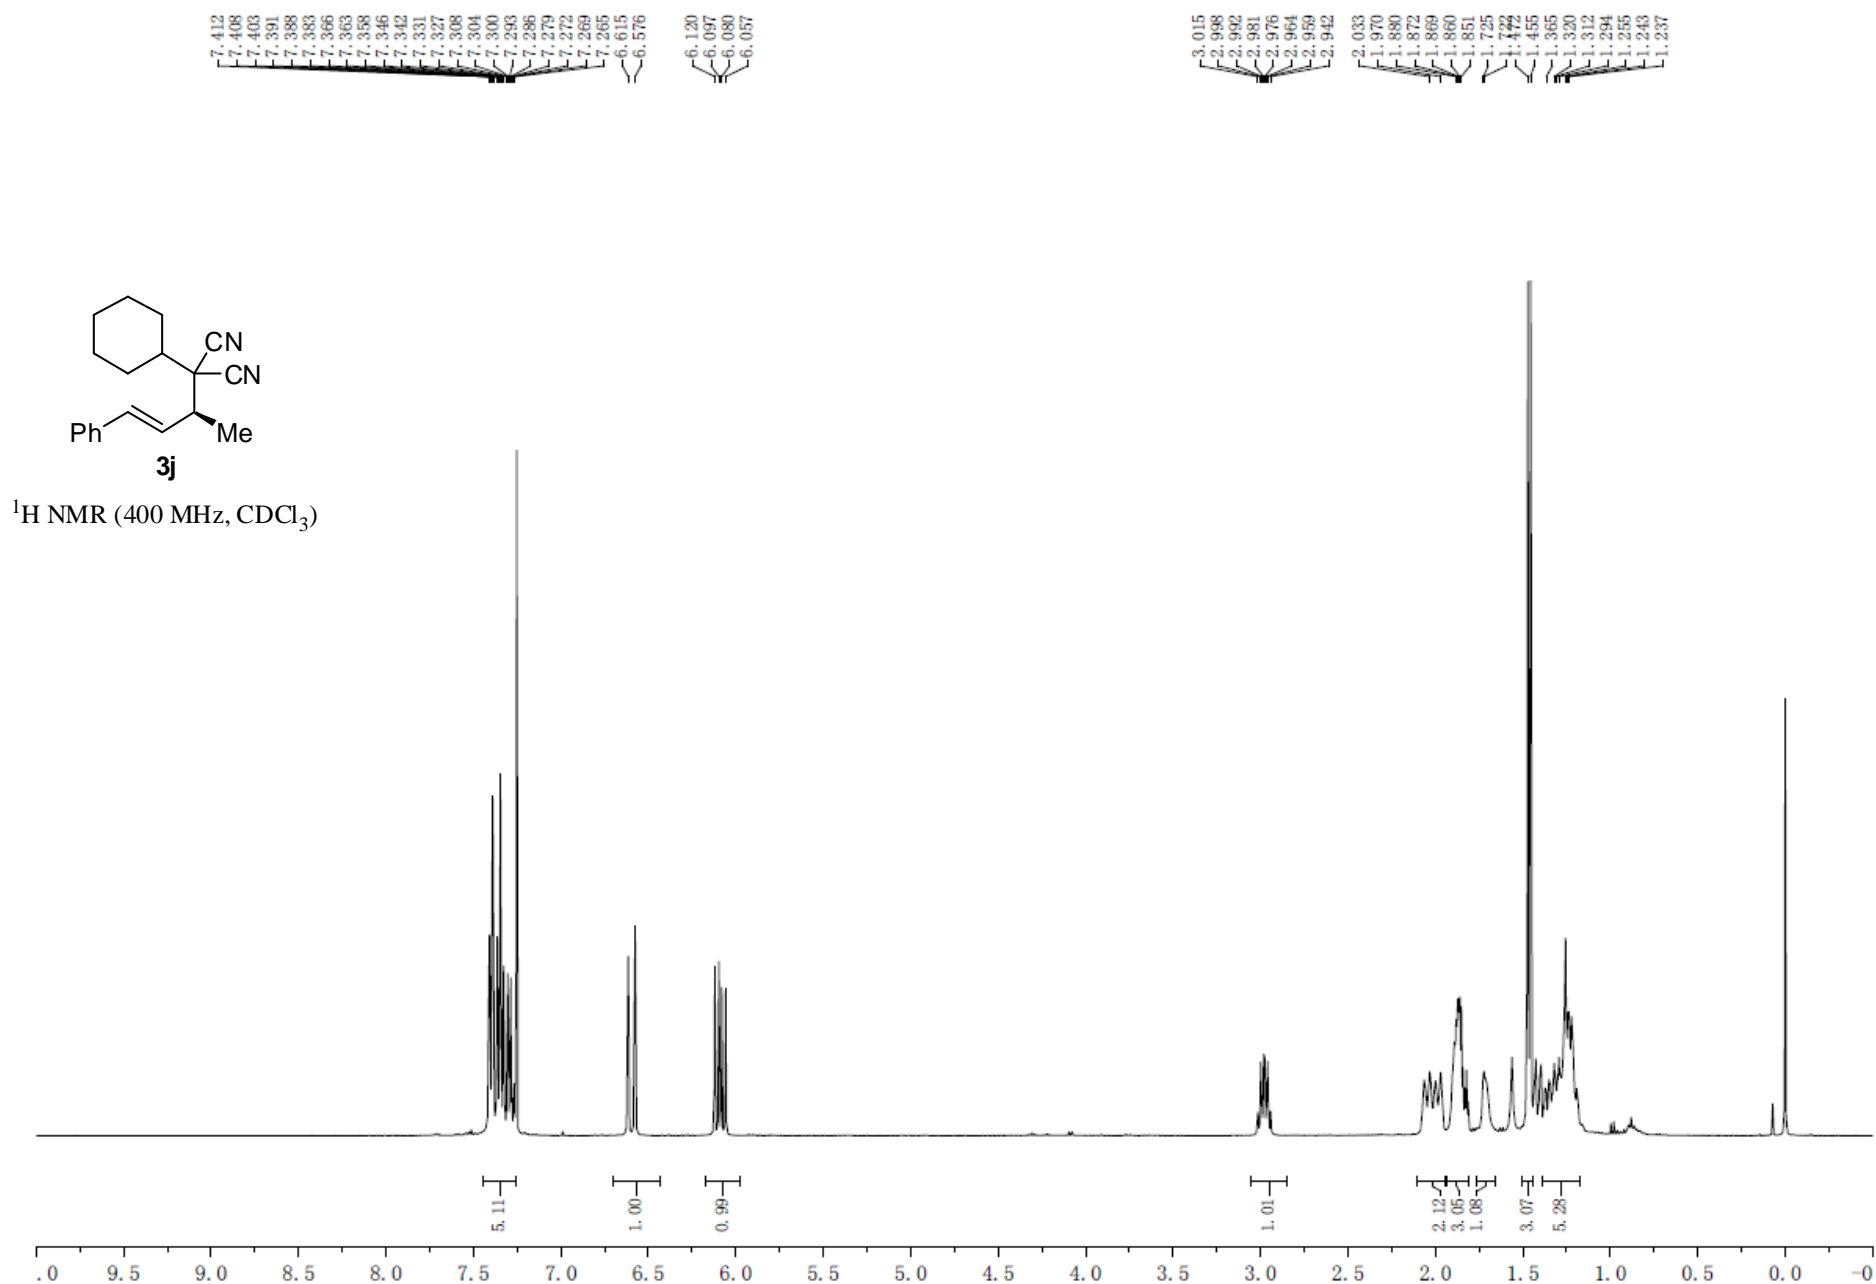



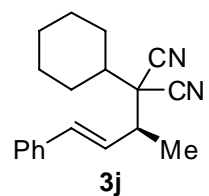

$^{13}\text{C}$  NMR (100 MHz,  $\text{CDCl}_3$ )

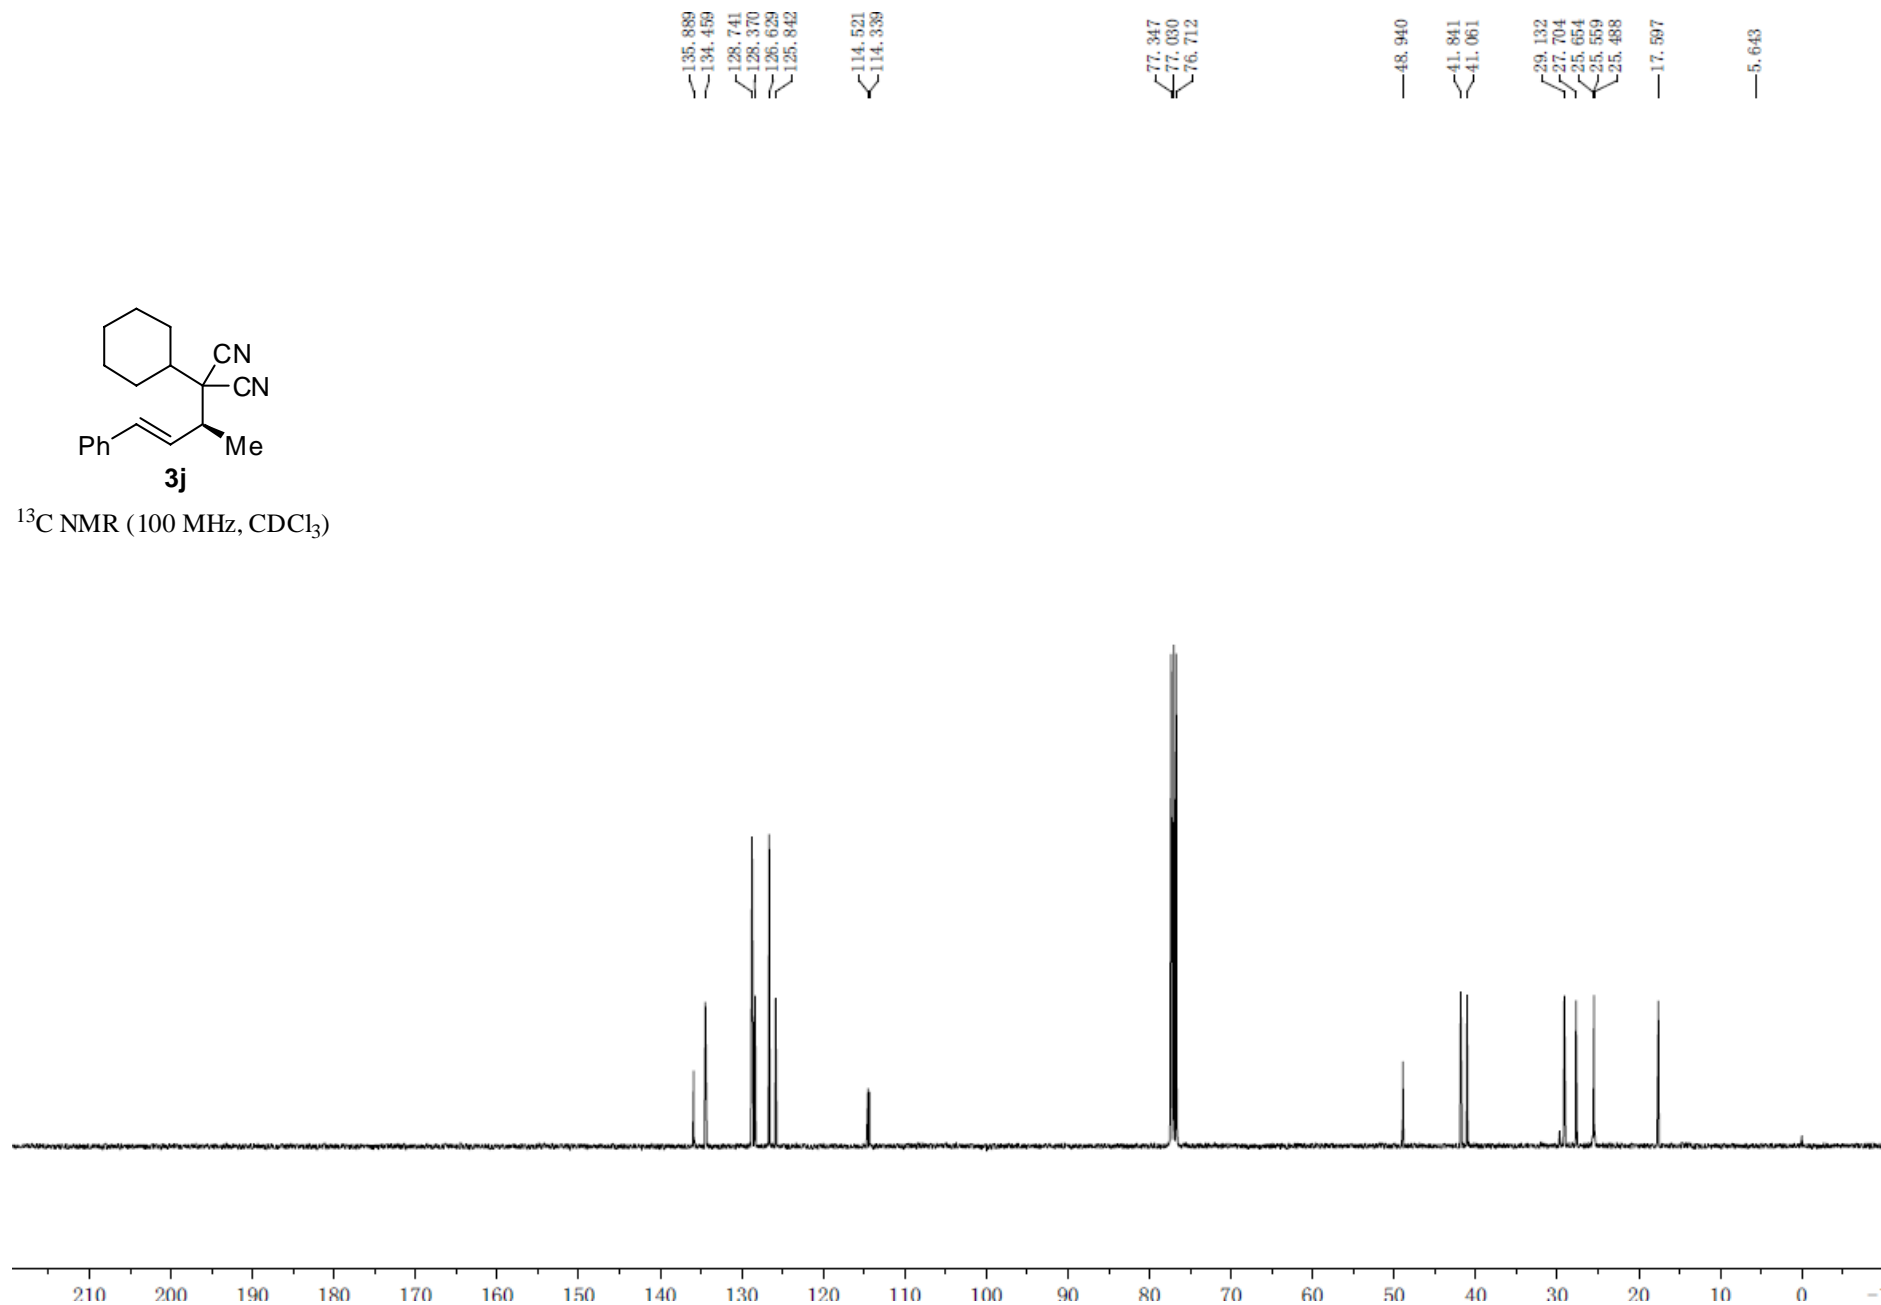

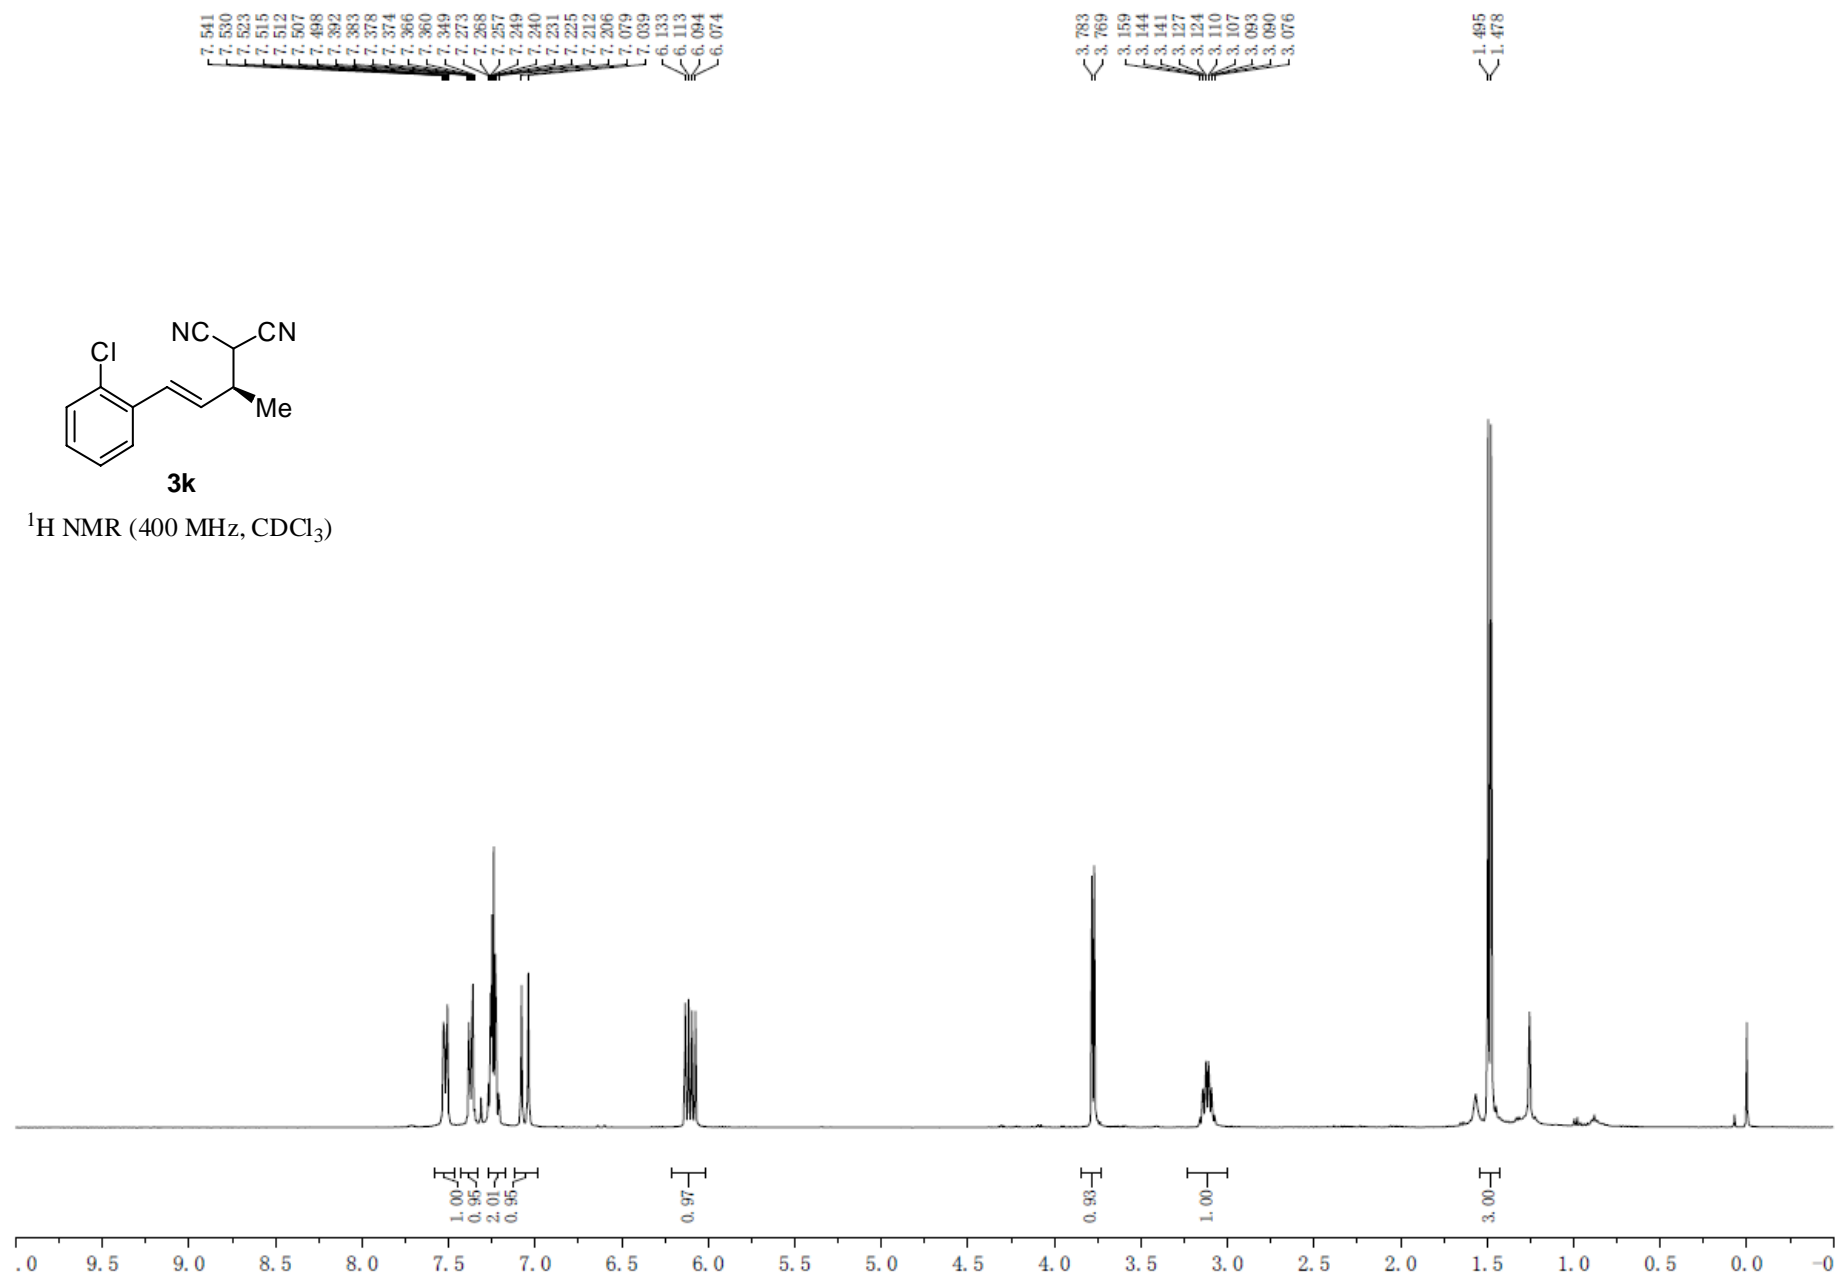

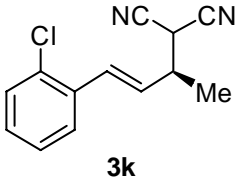

<sup>13</sup>C NMR (100 MHz, CDCl<sub>3</sub>)

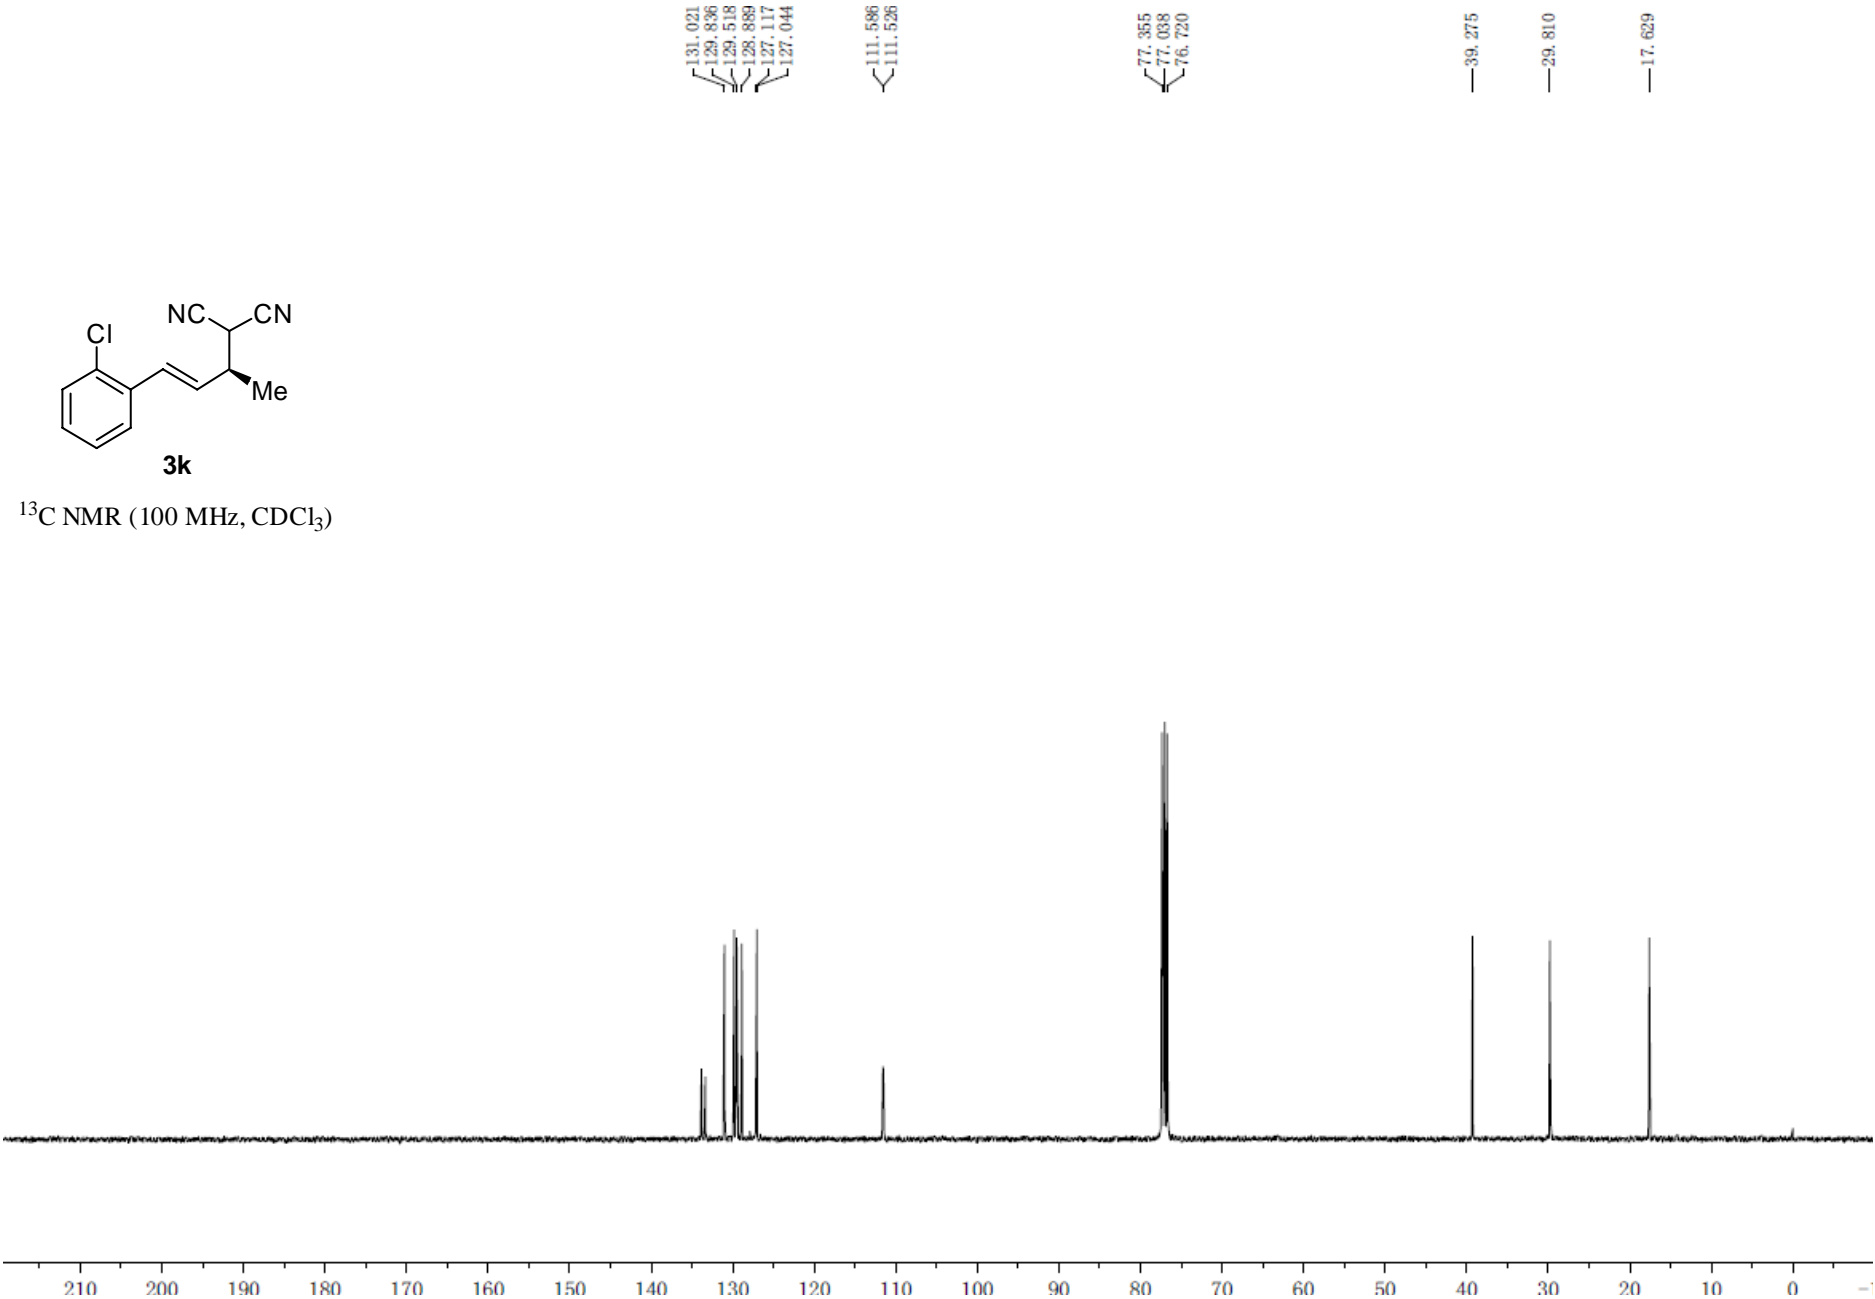

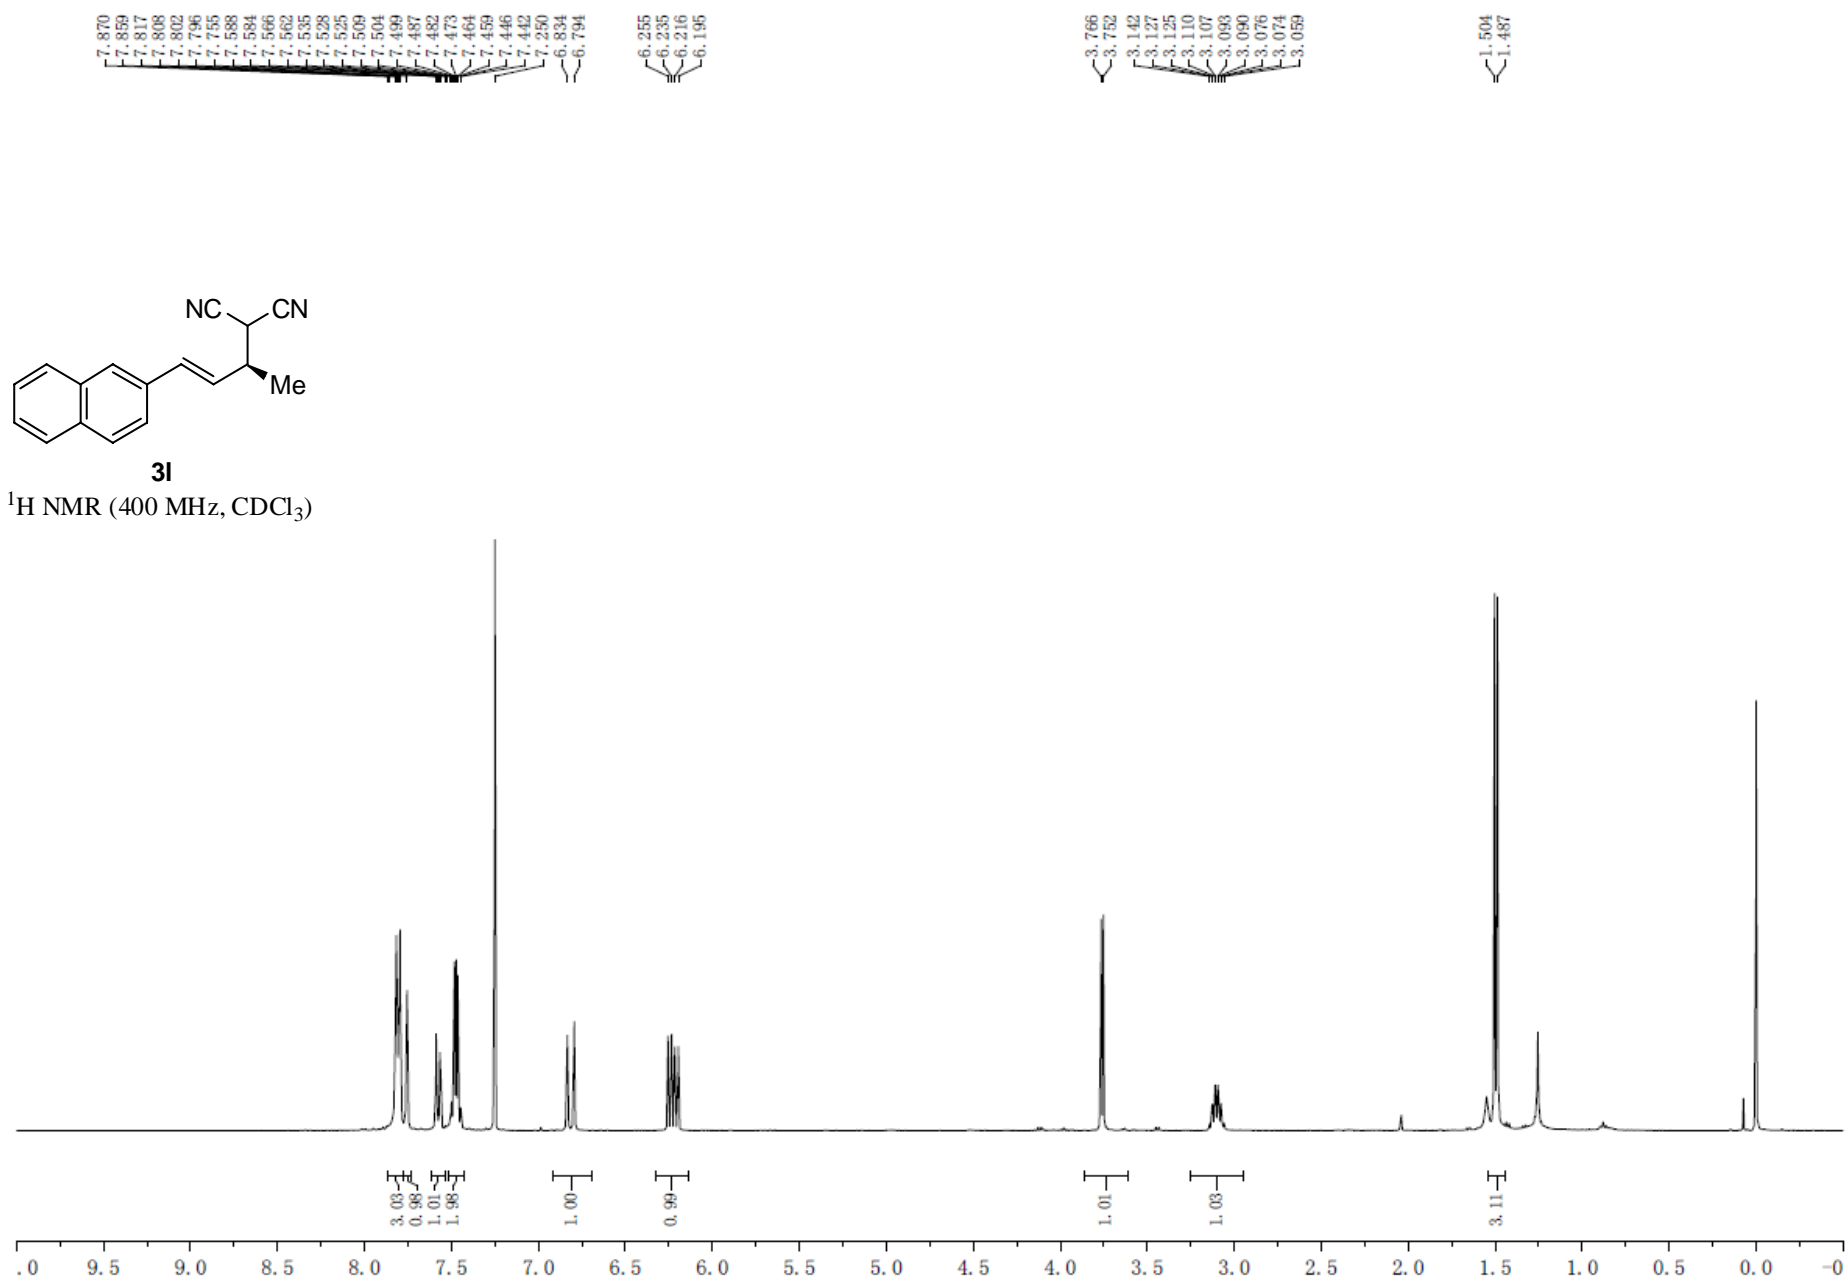

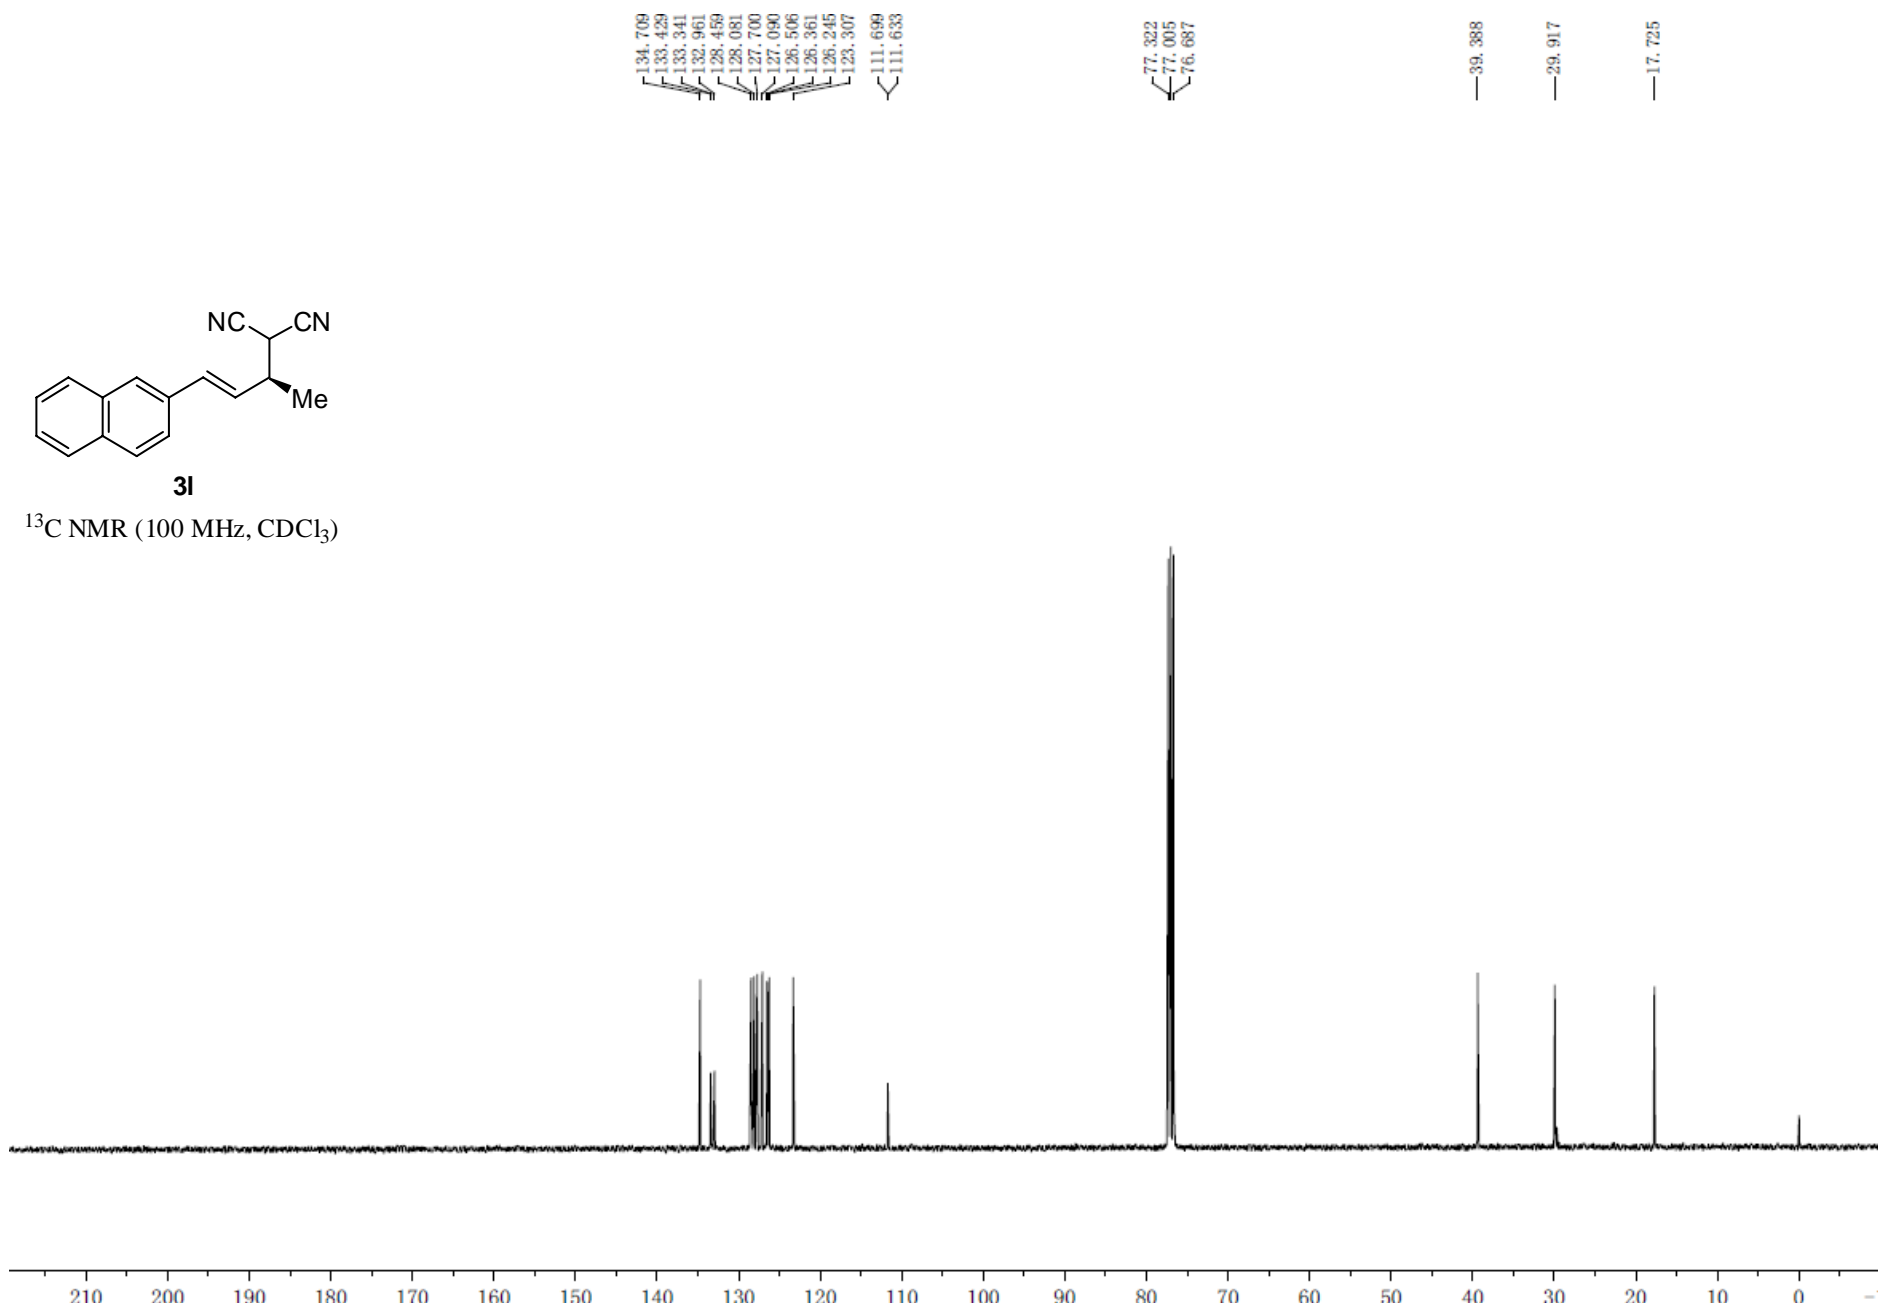

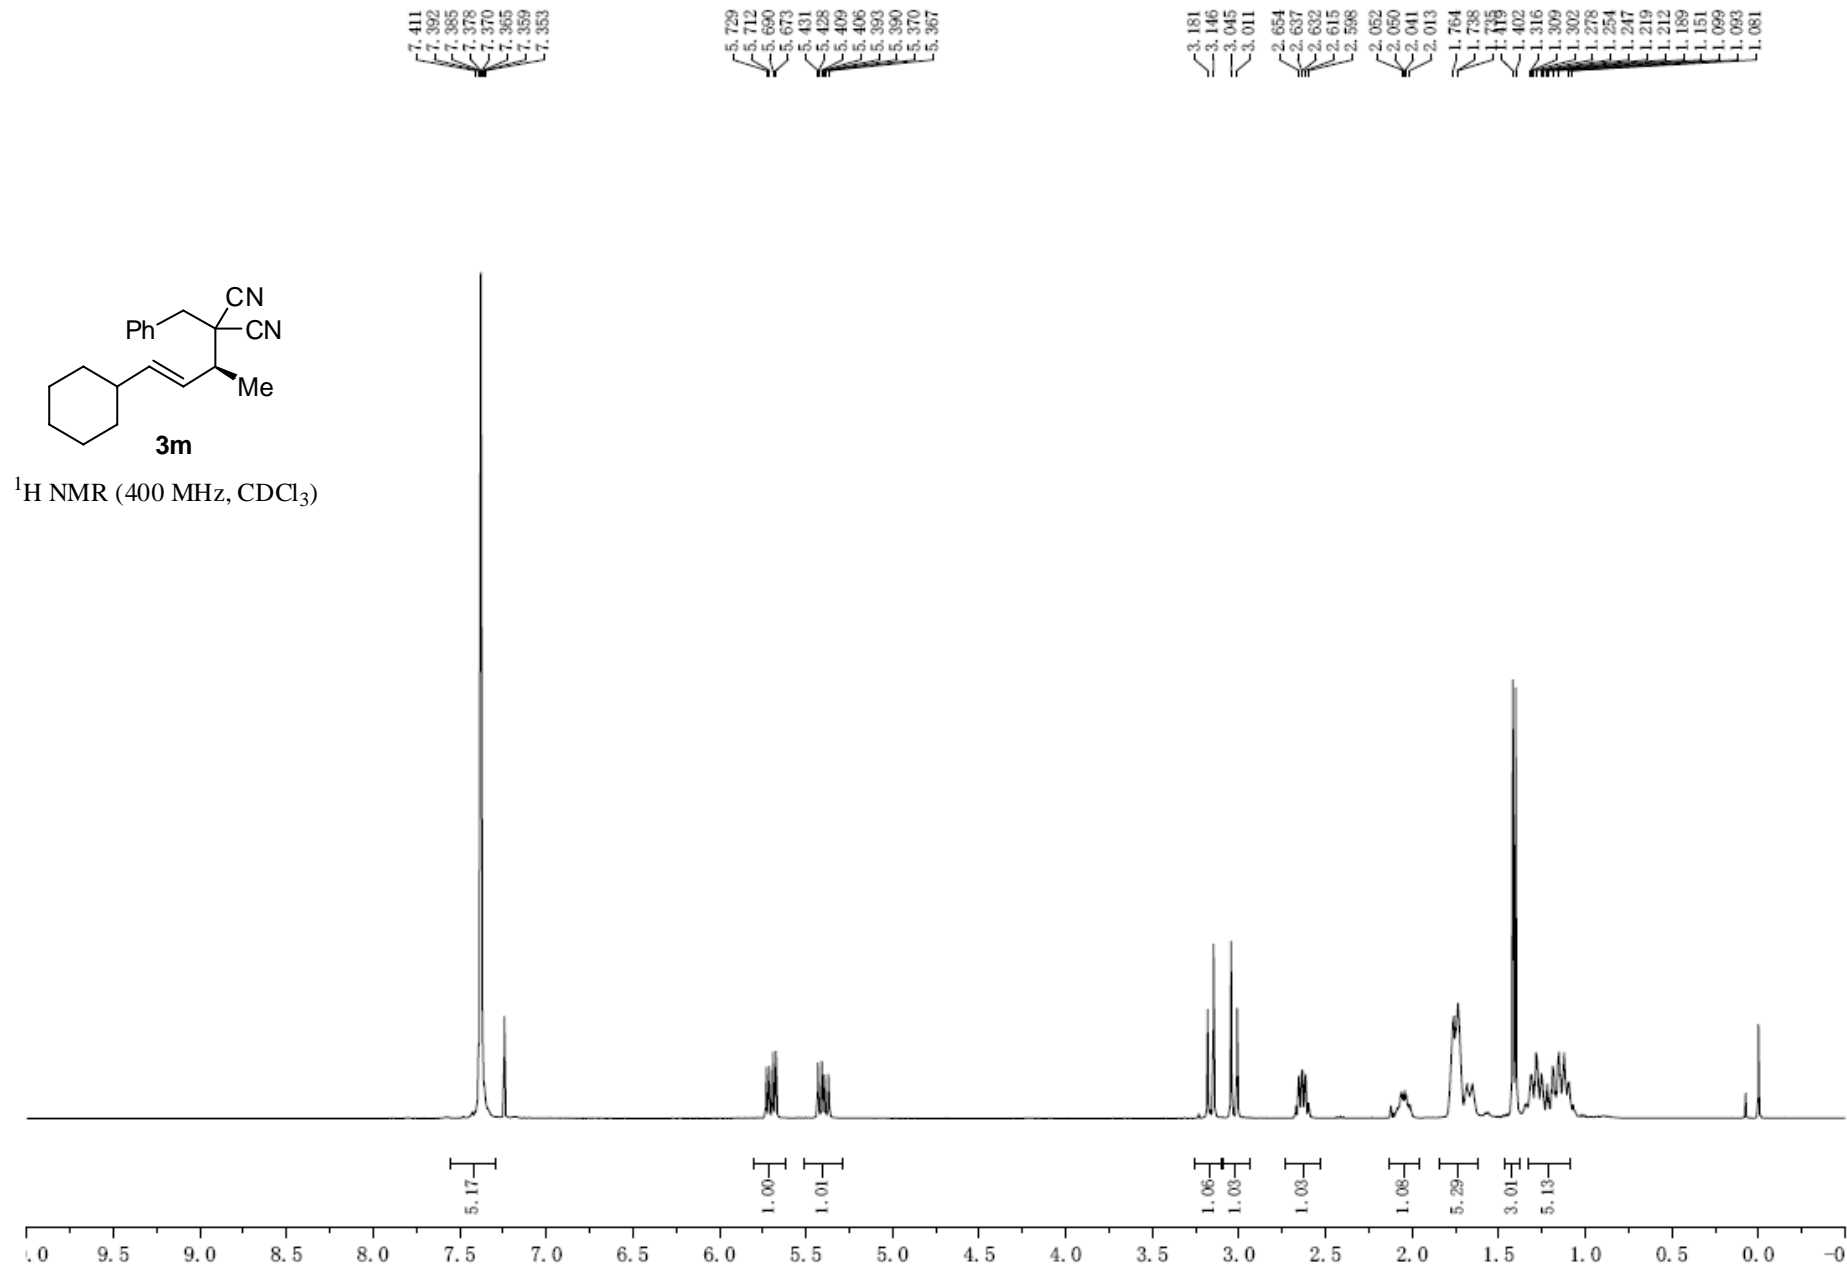

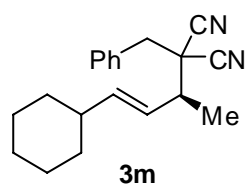

$^{13}\text{C}$  NMR (100 MHz,  $\text{CDCl}_3$ )

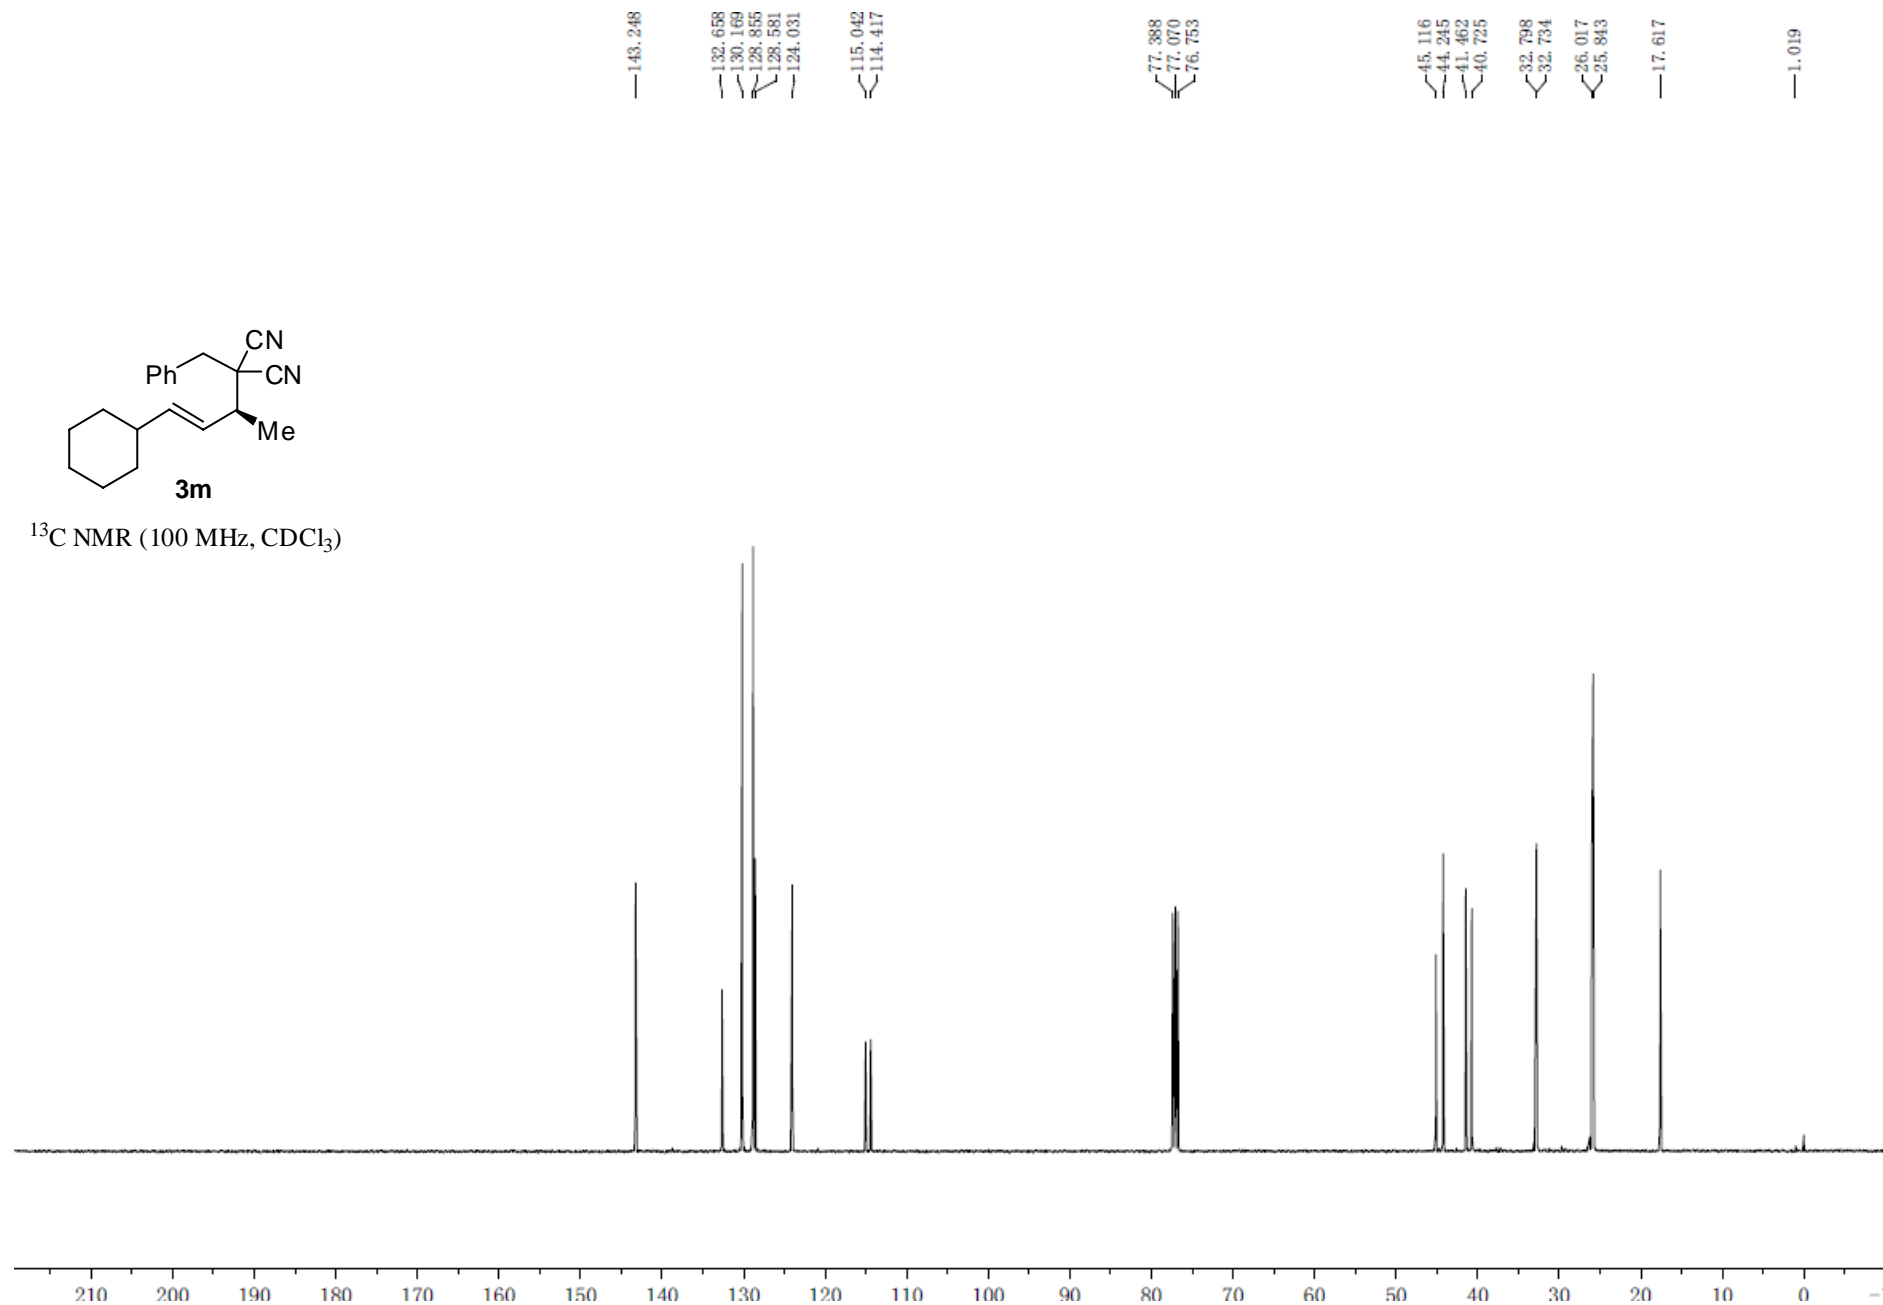

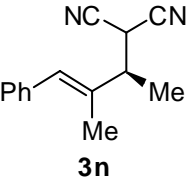

<sup>1</sup>H NMR (400 MHz, CDCl<sub>3</sub>)

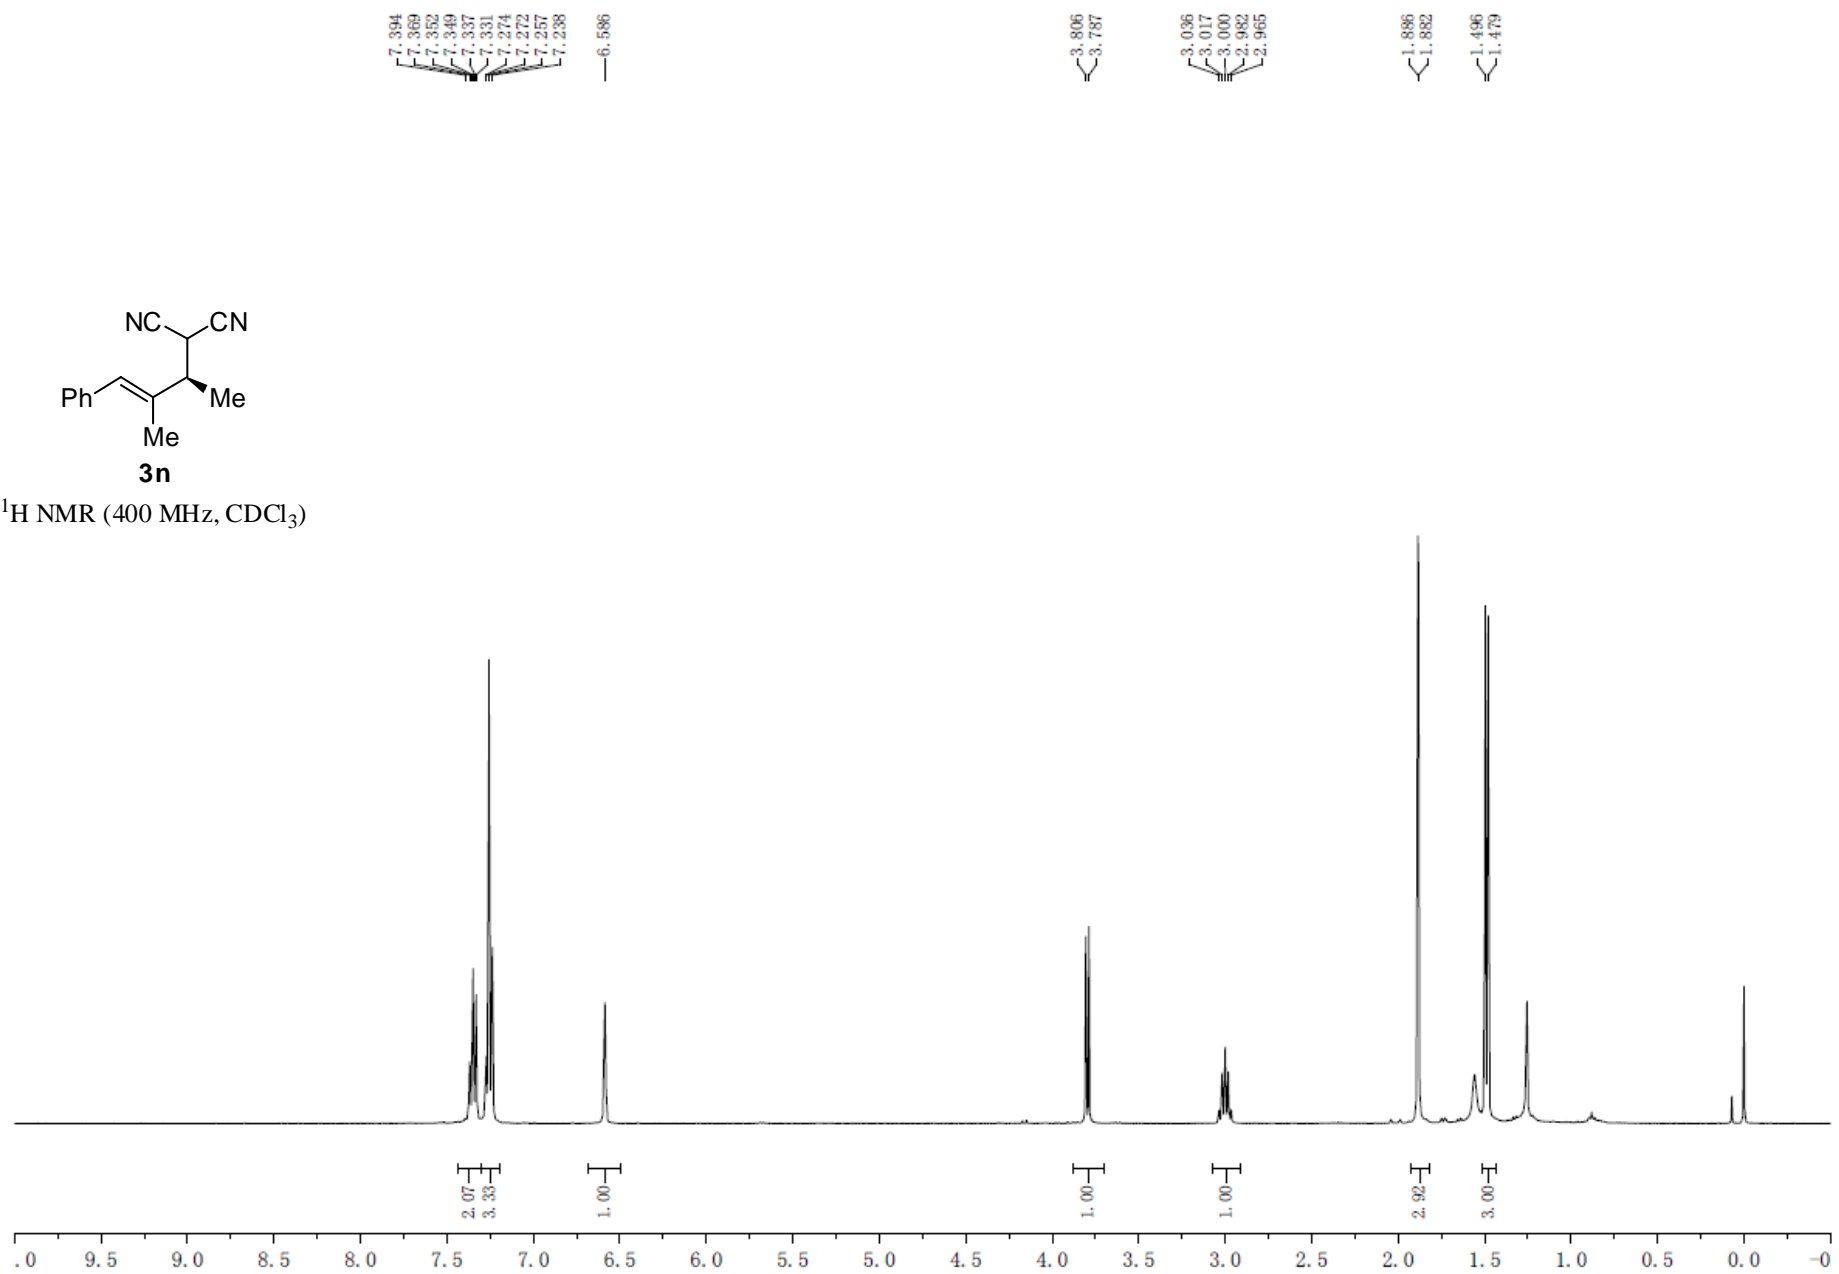



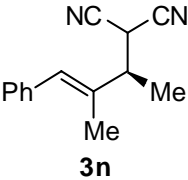

<sup>13</sup>C NMR (100 MHz, CDCl<sub>3</sub>)

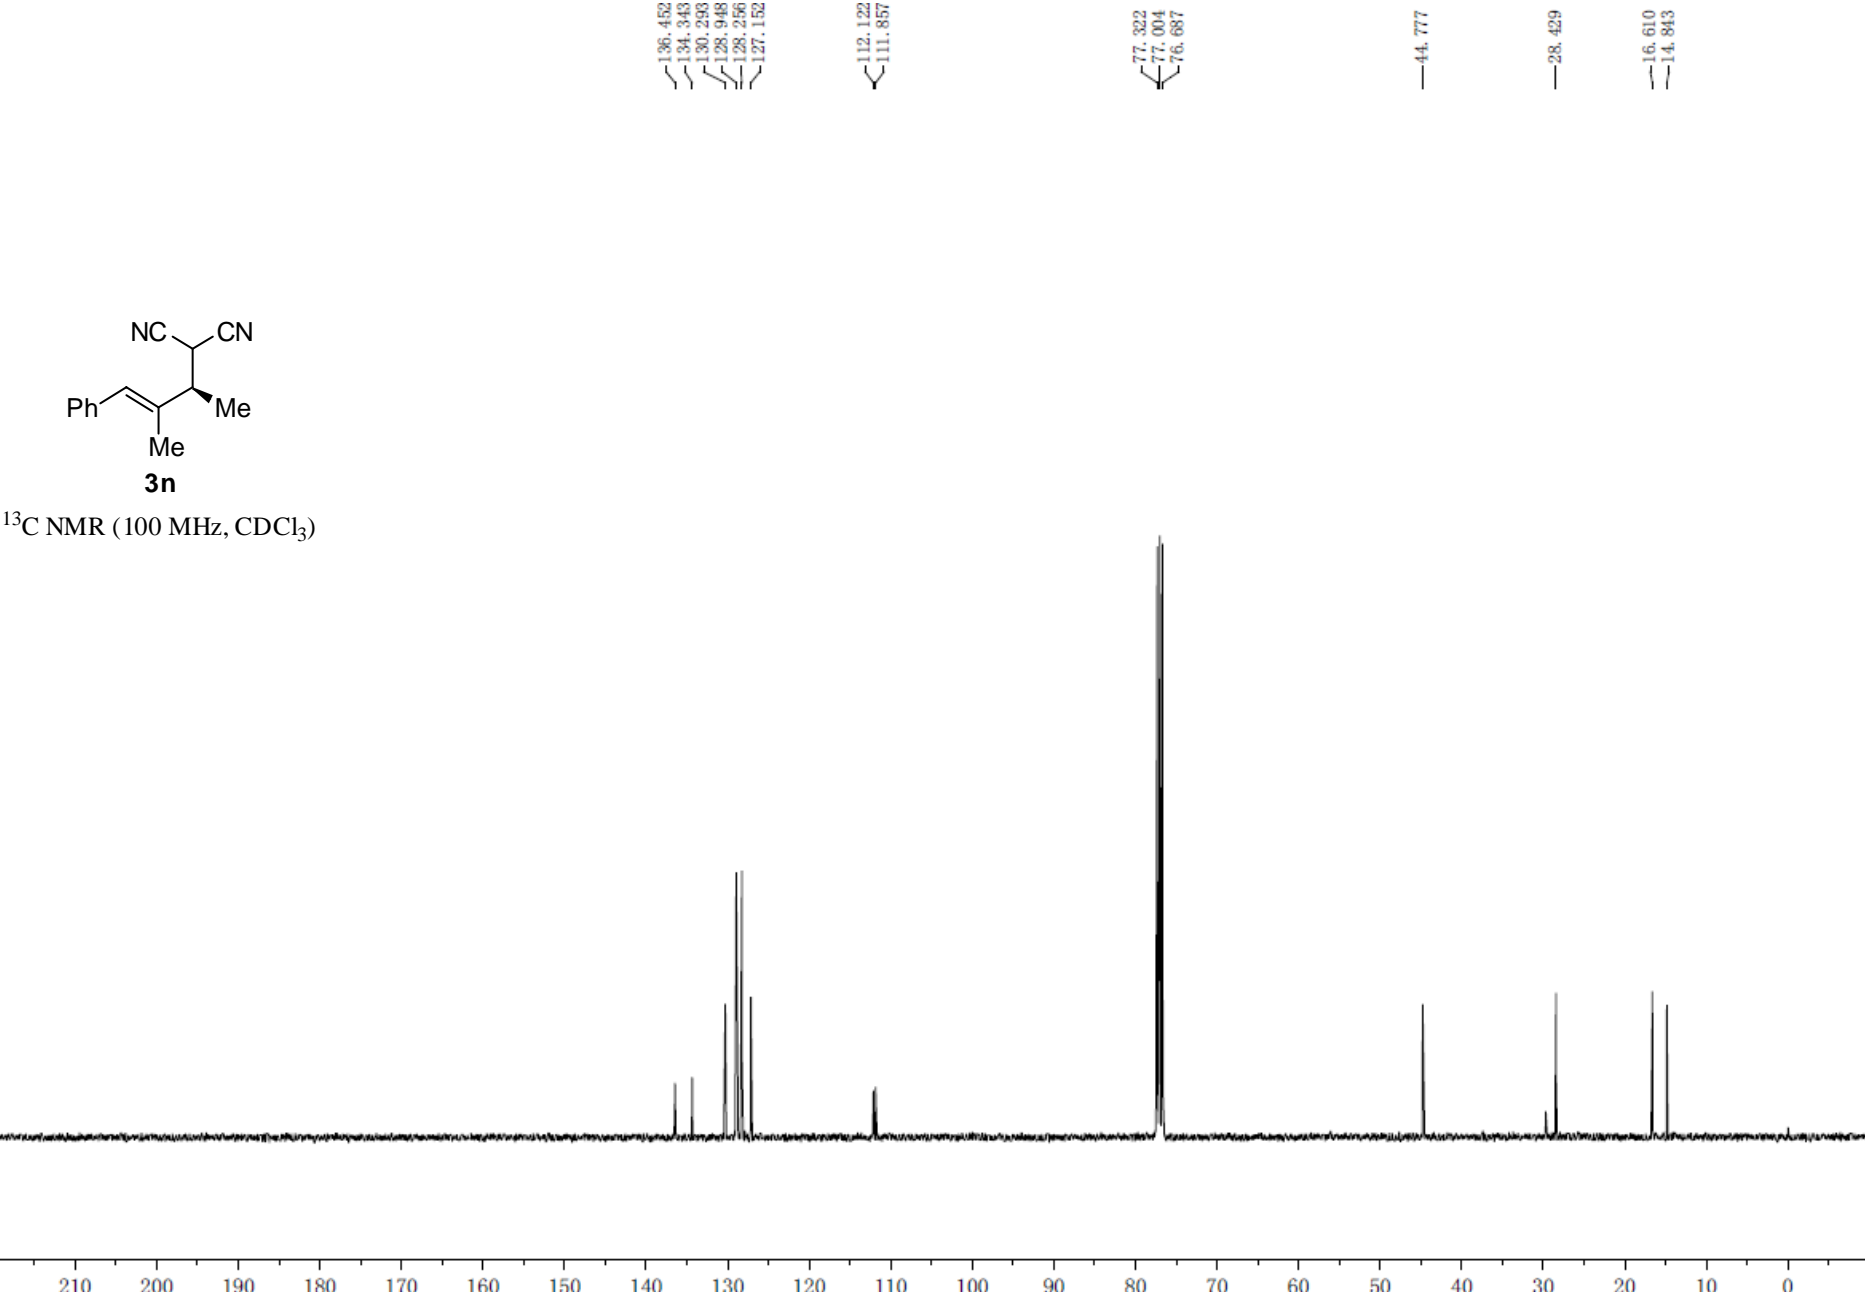

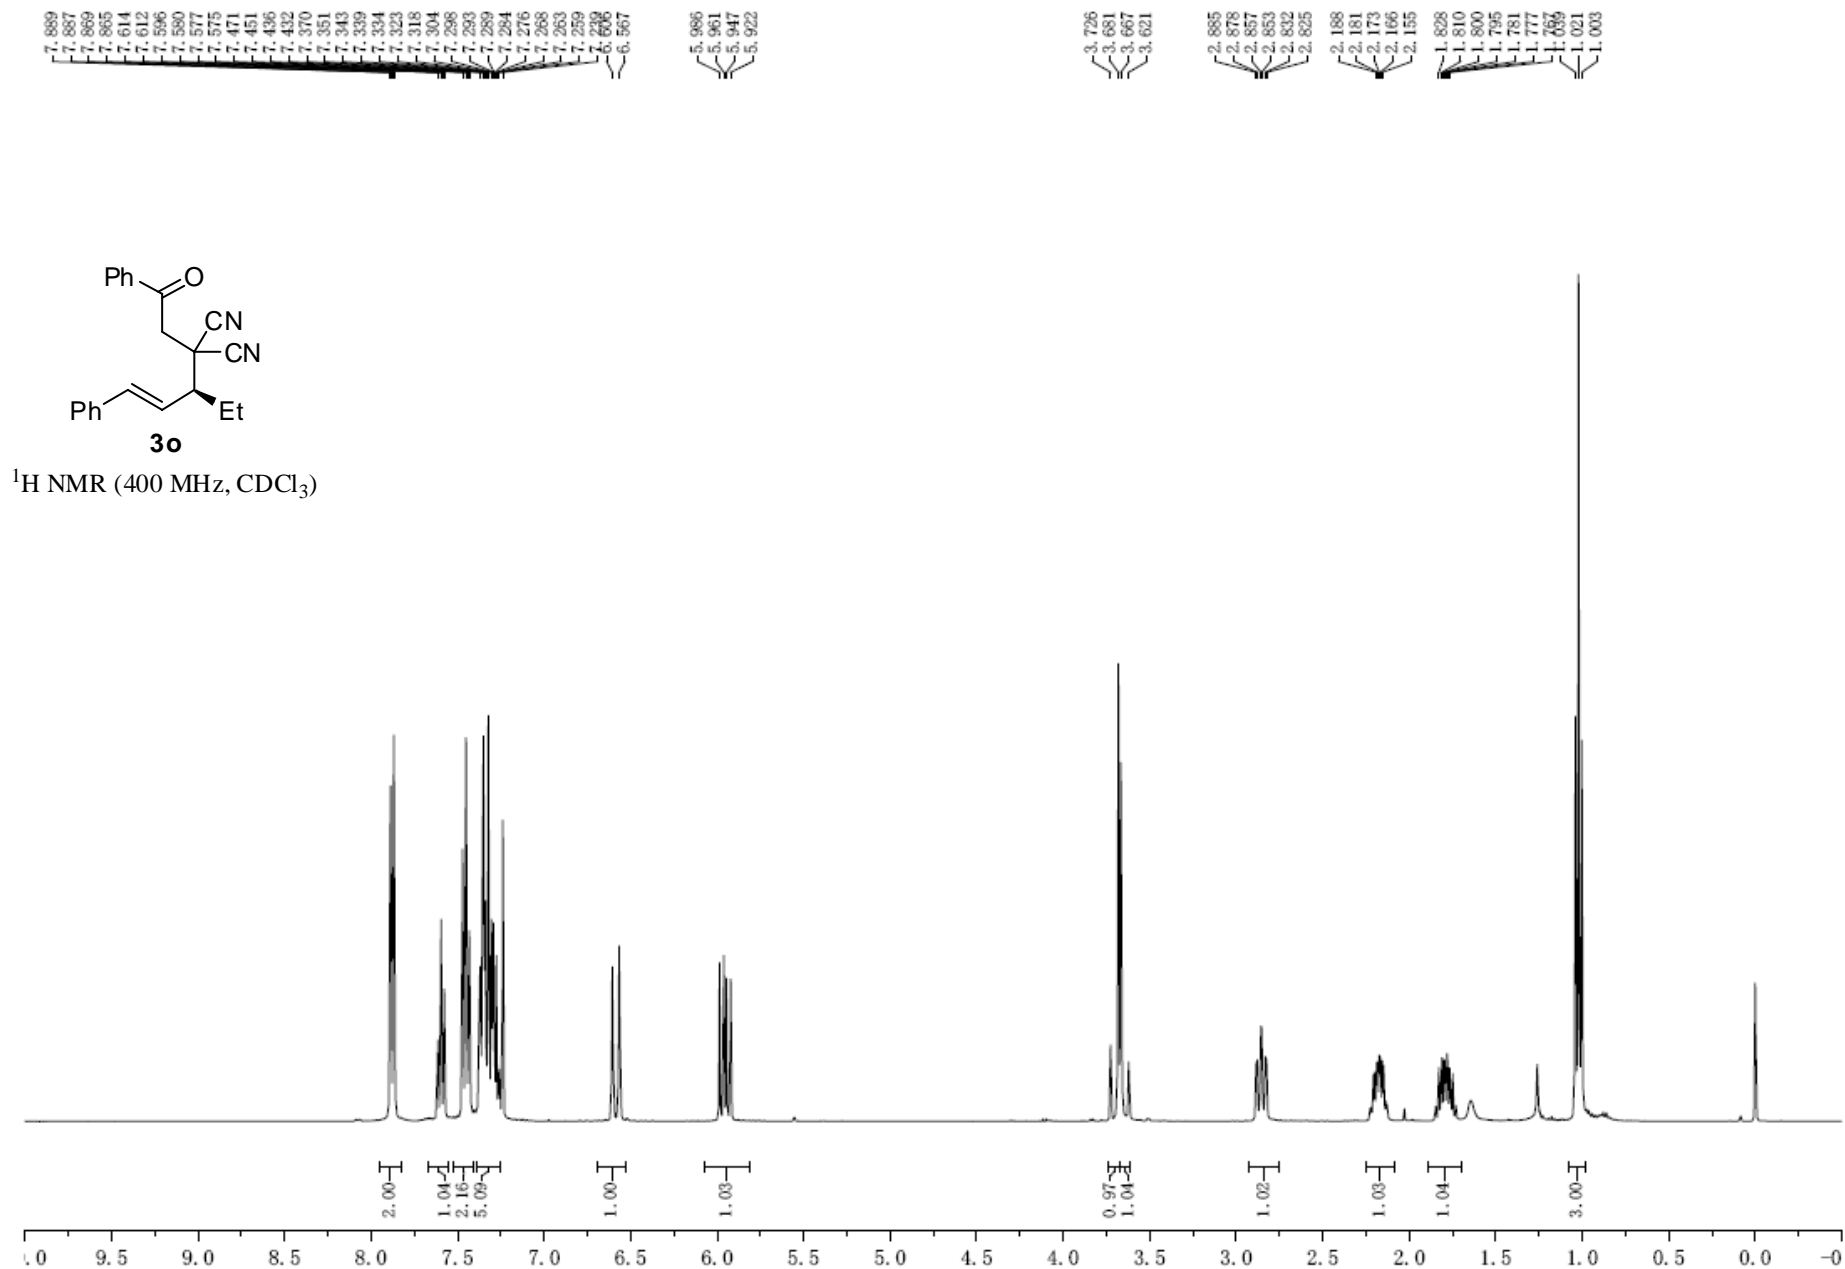

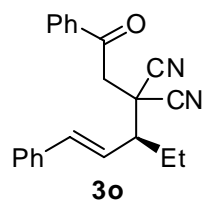

$^{13}\text{C}$  NMR (100 MHz,  $\text{CDCl}_3$ )

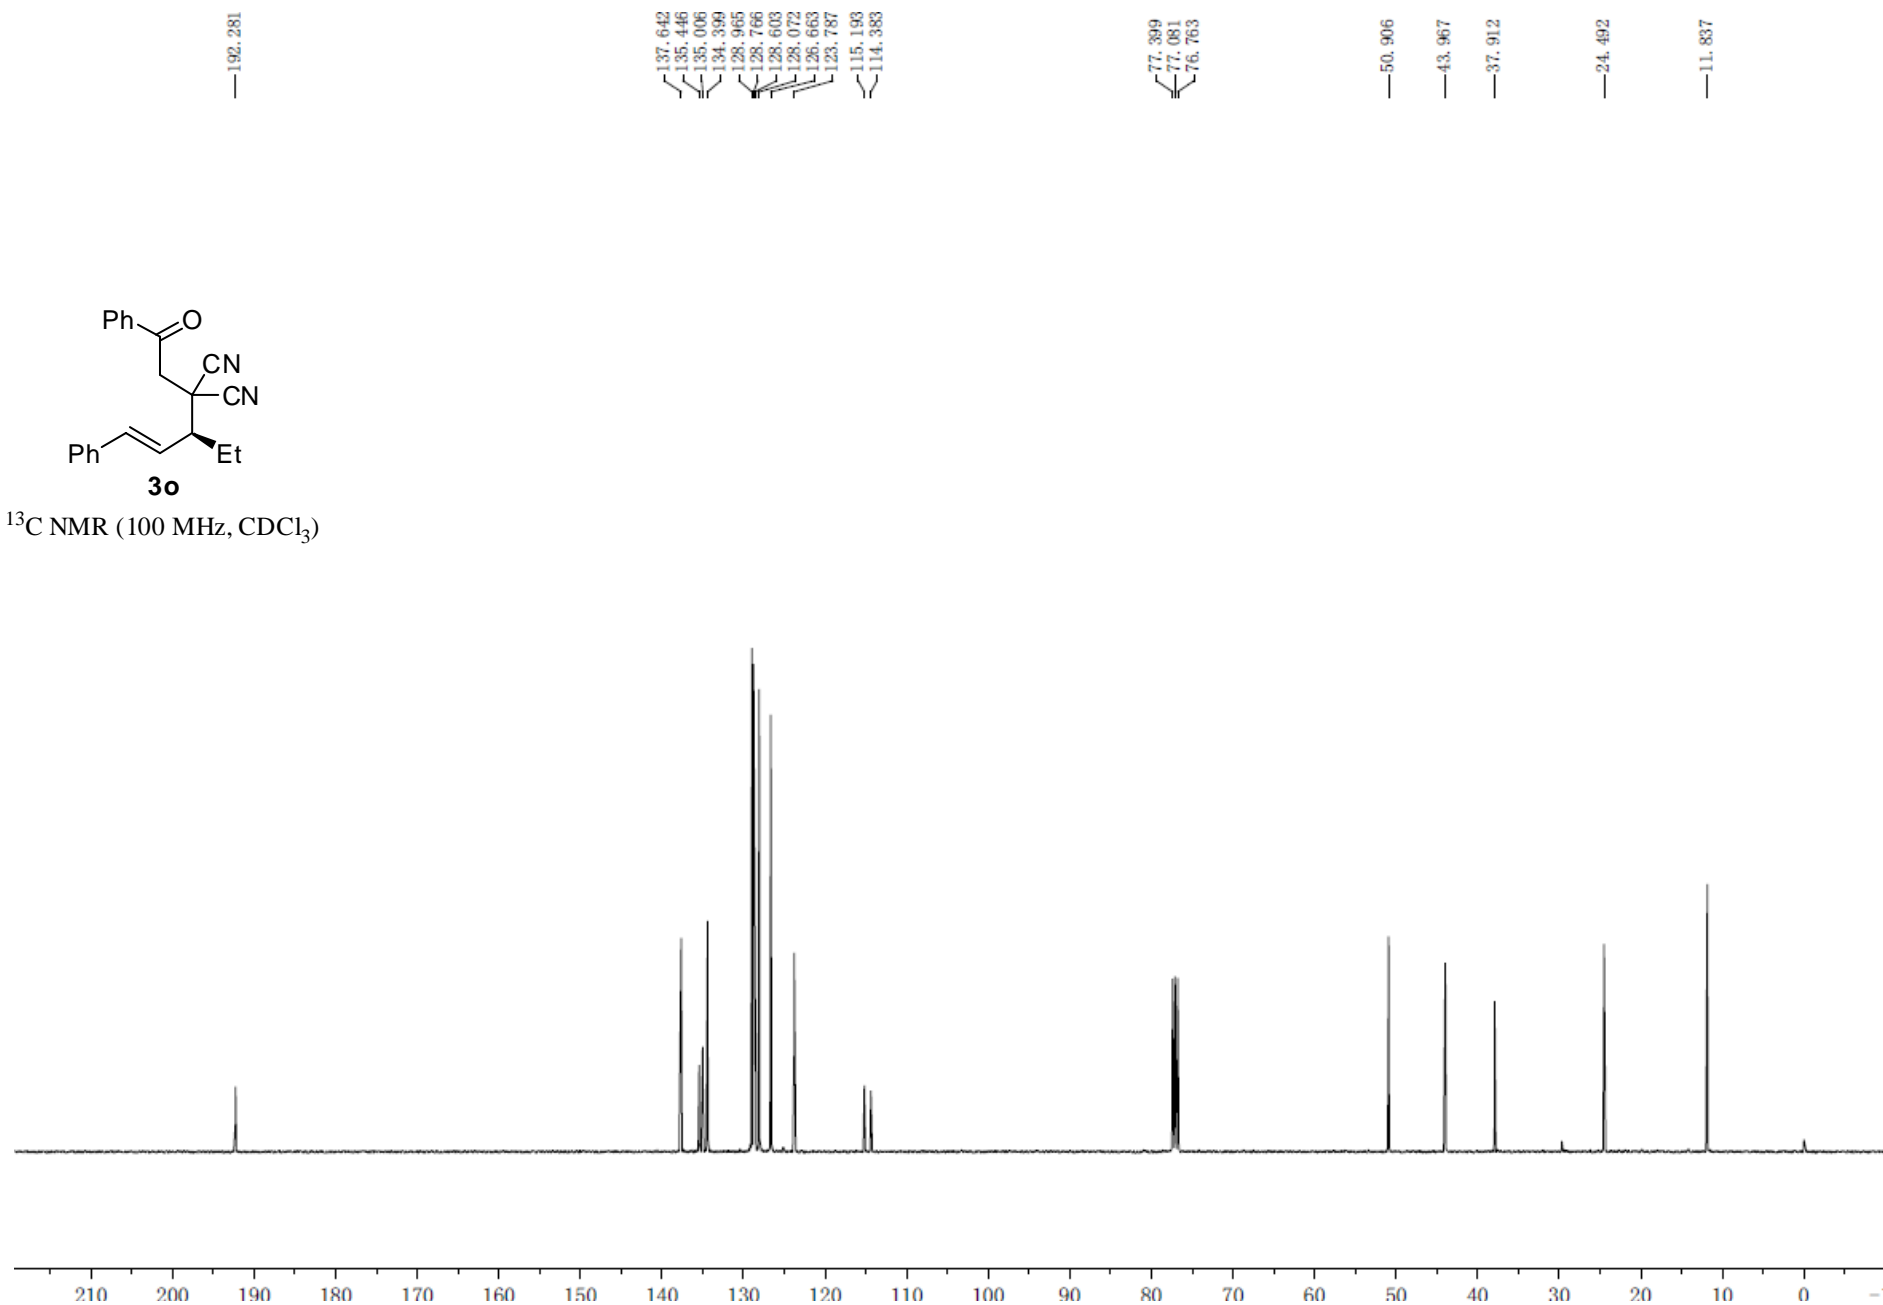

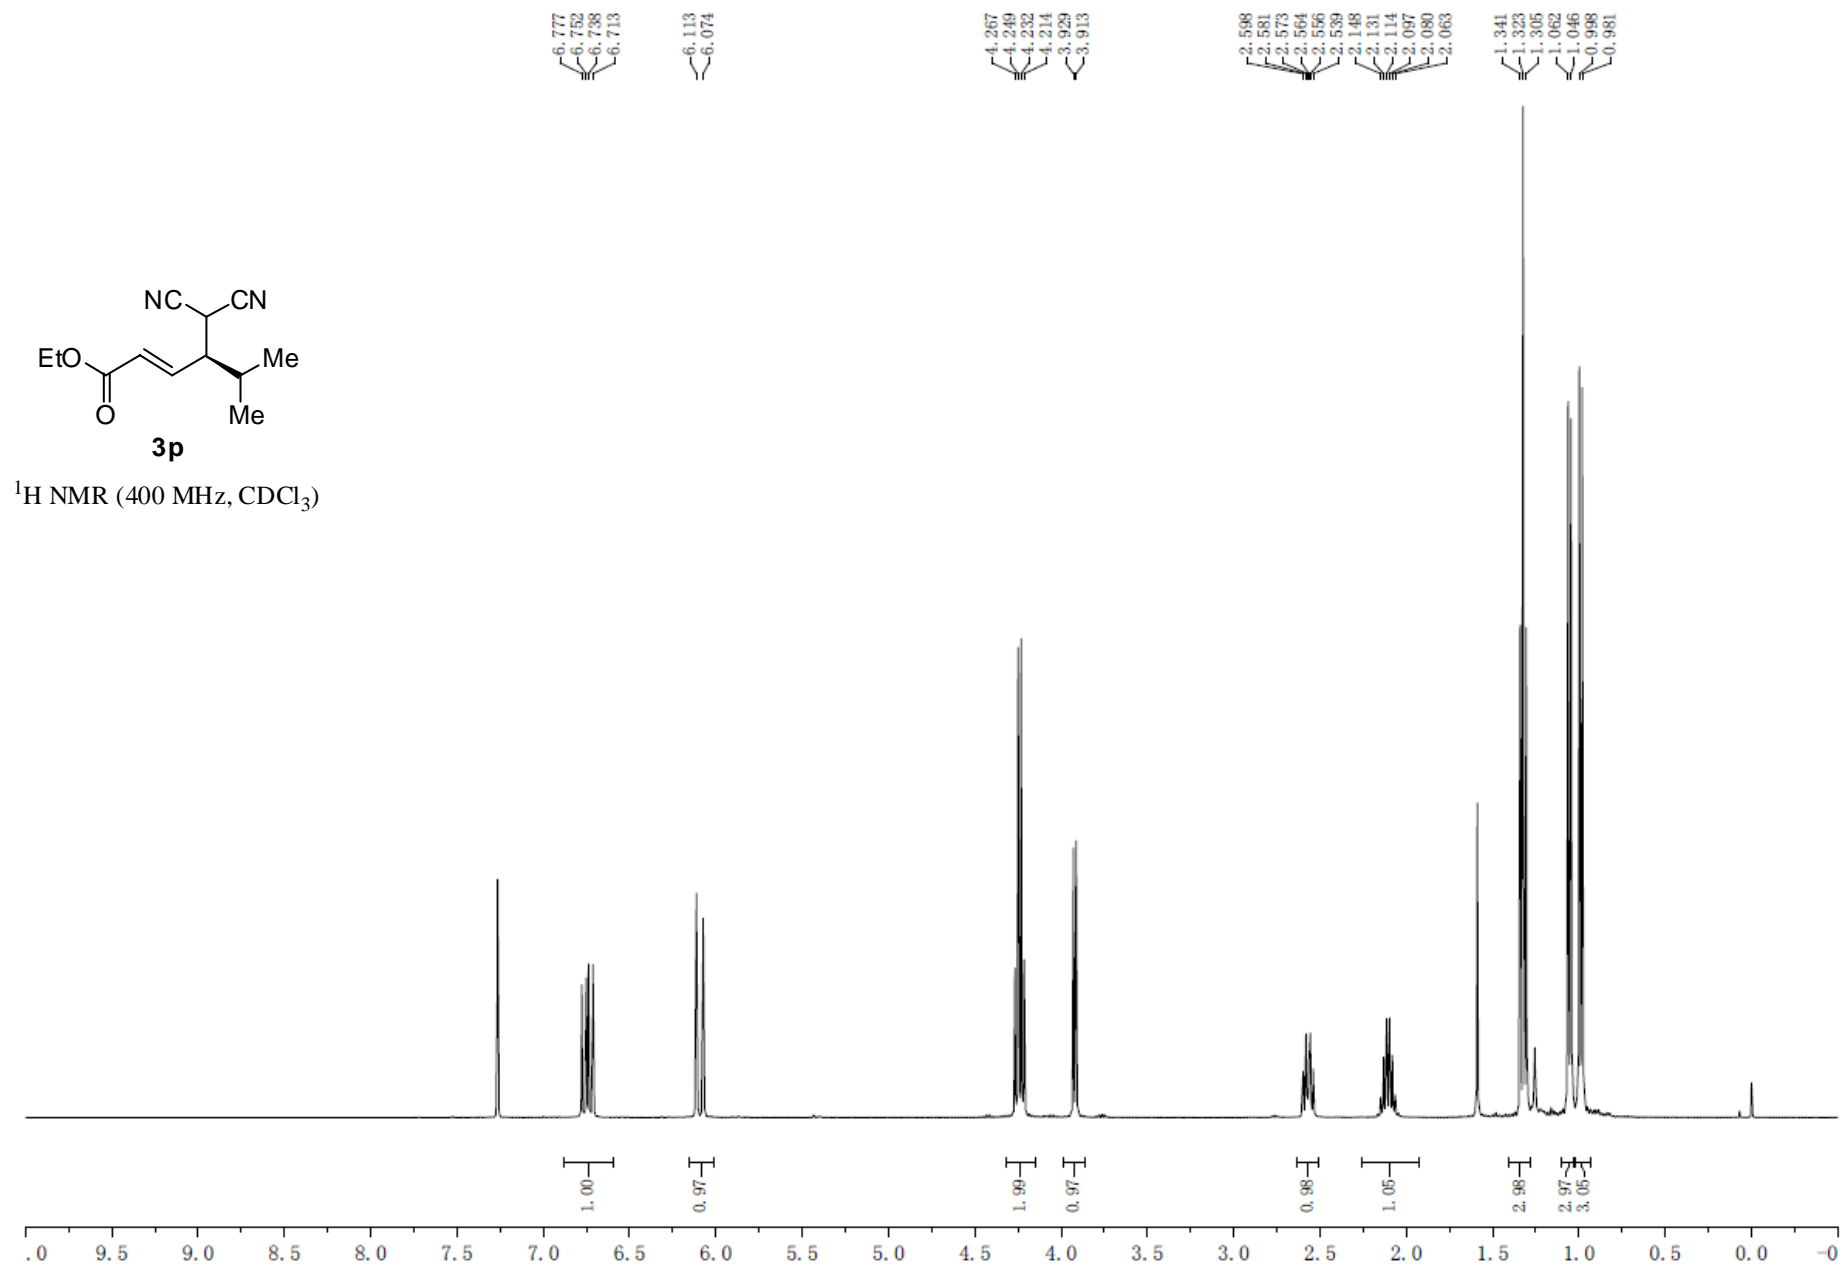

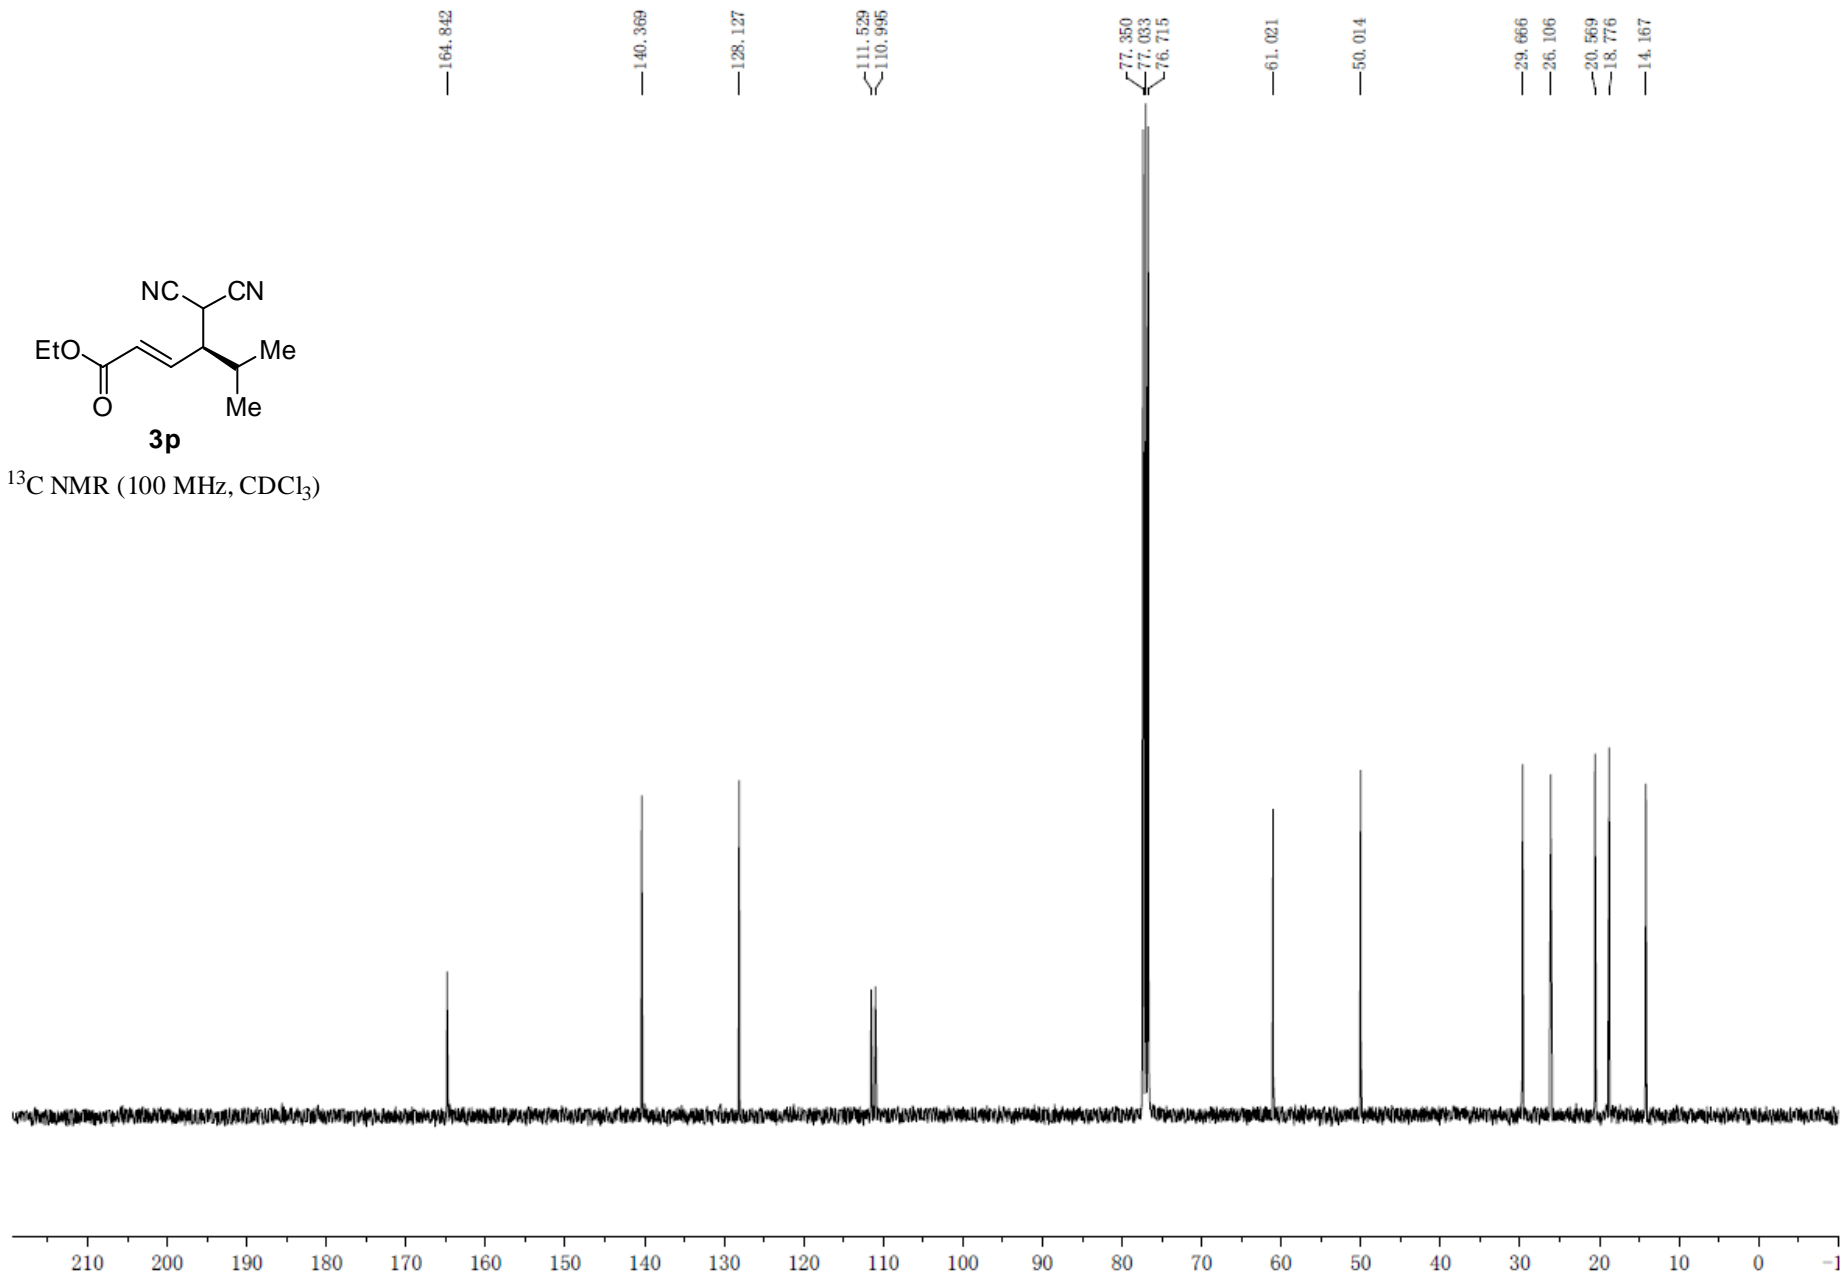

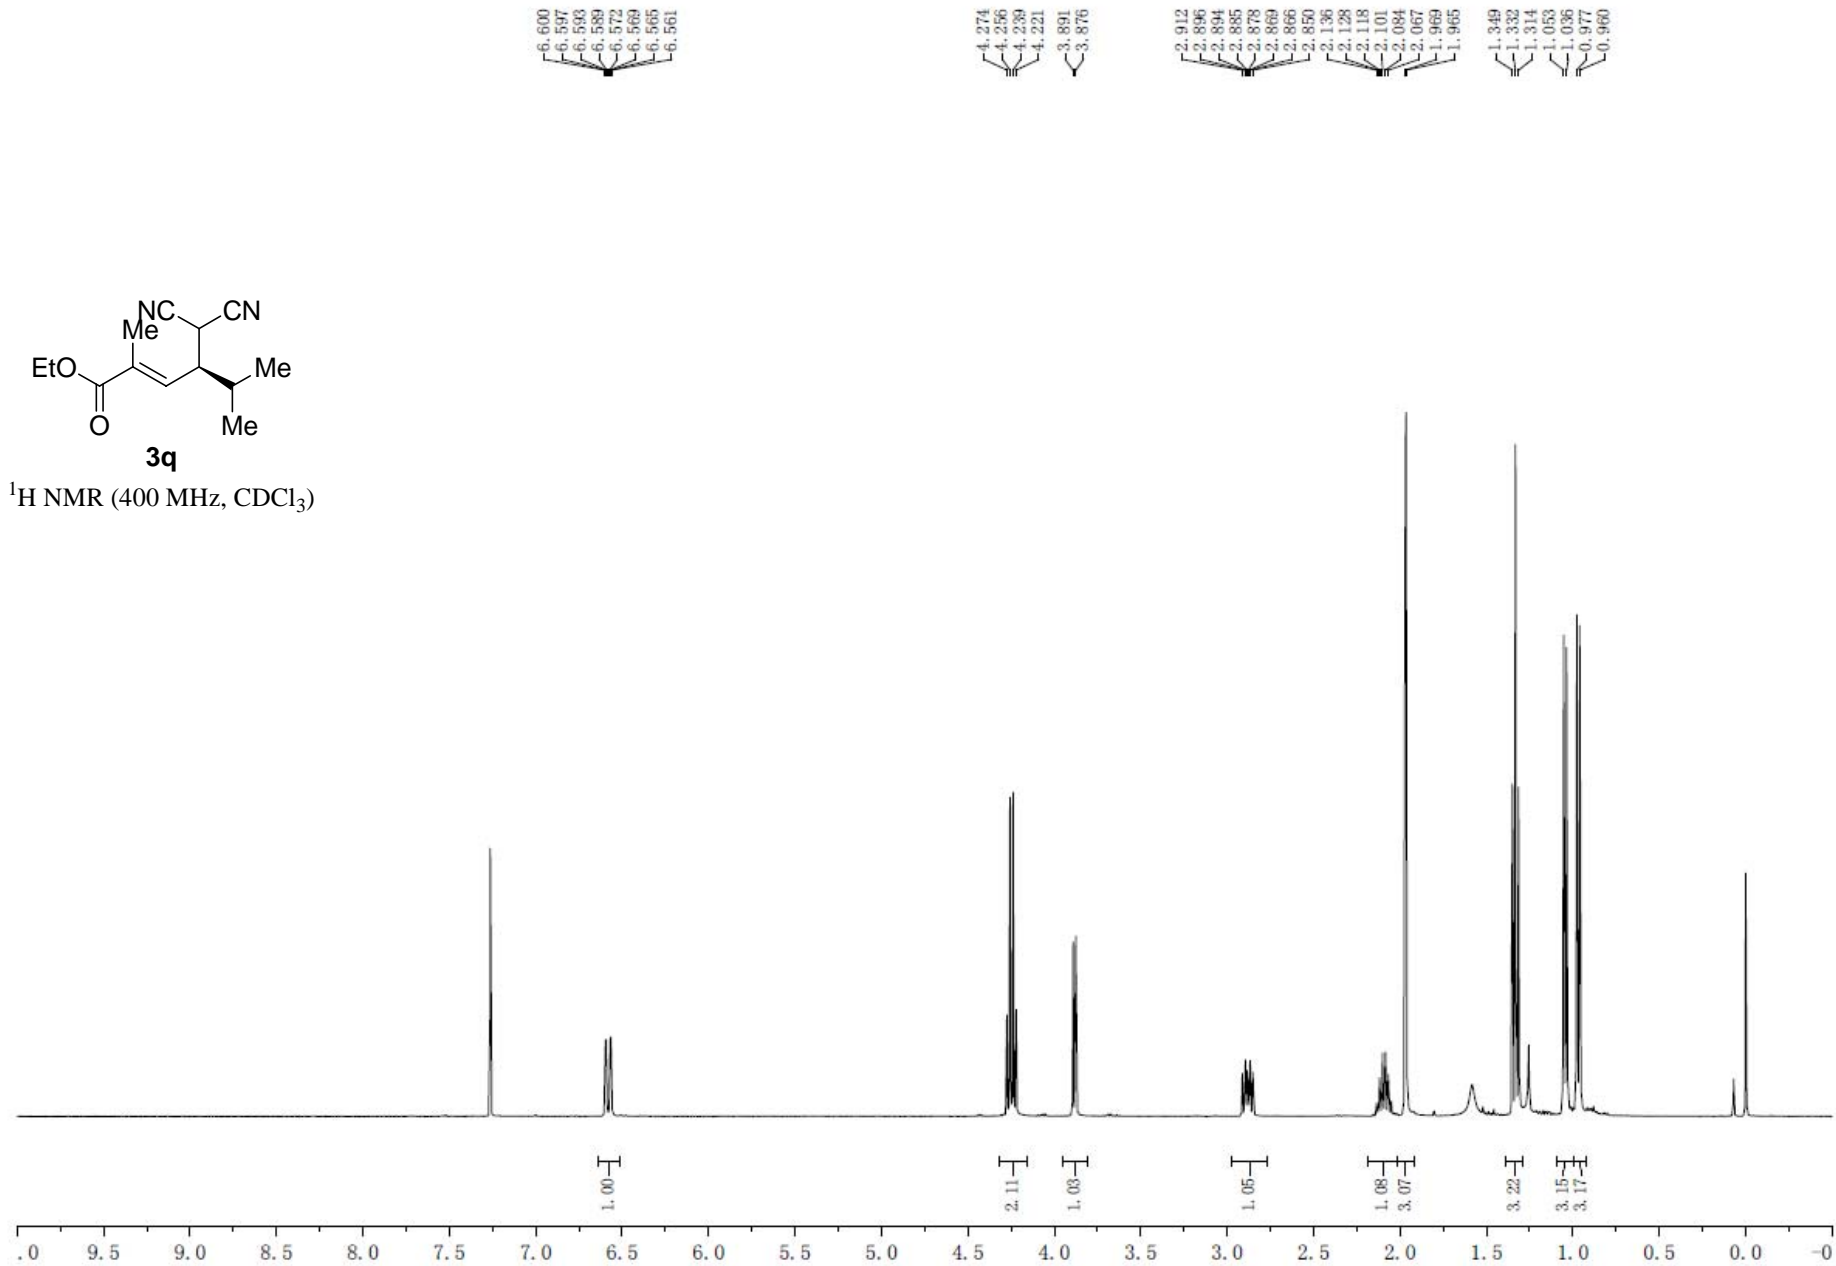

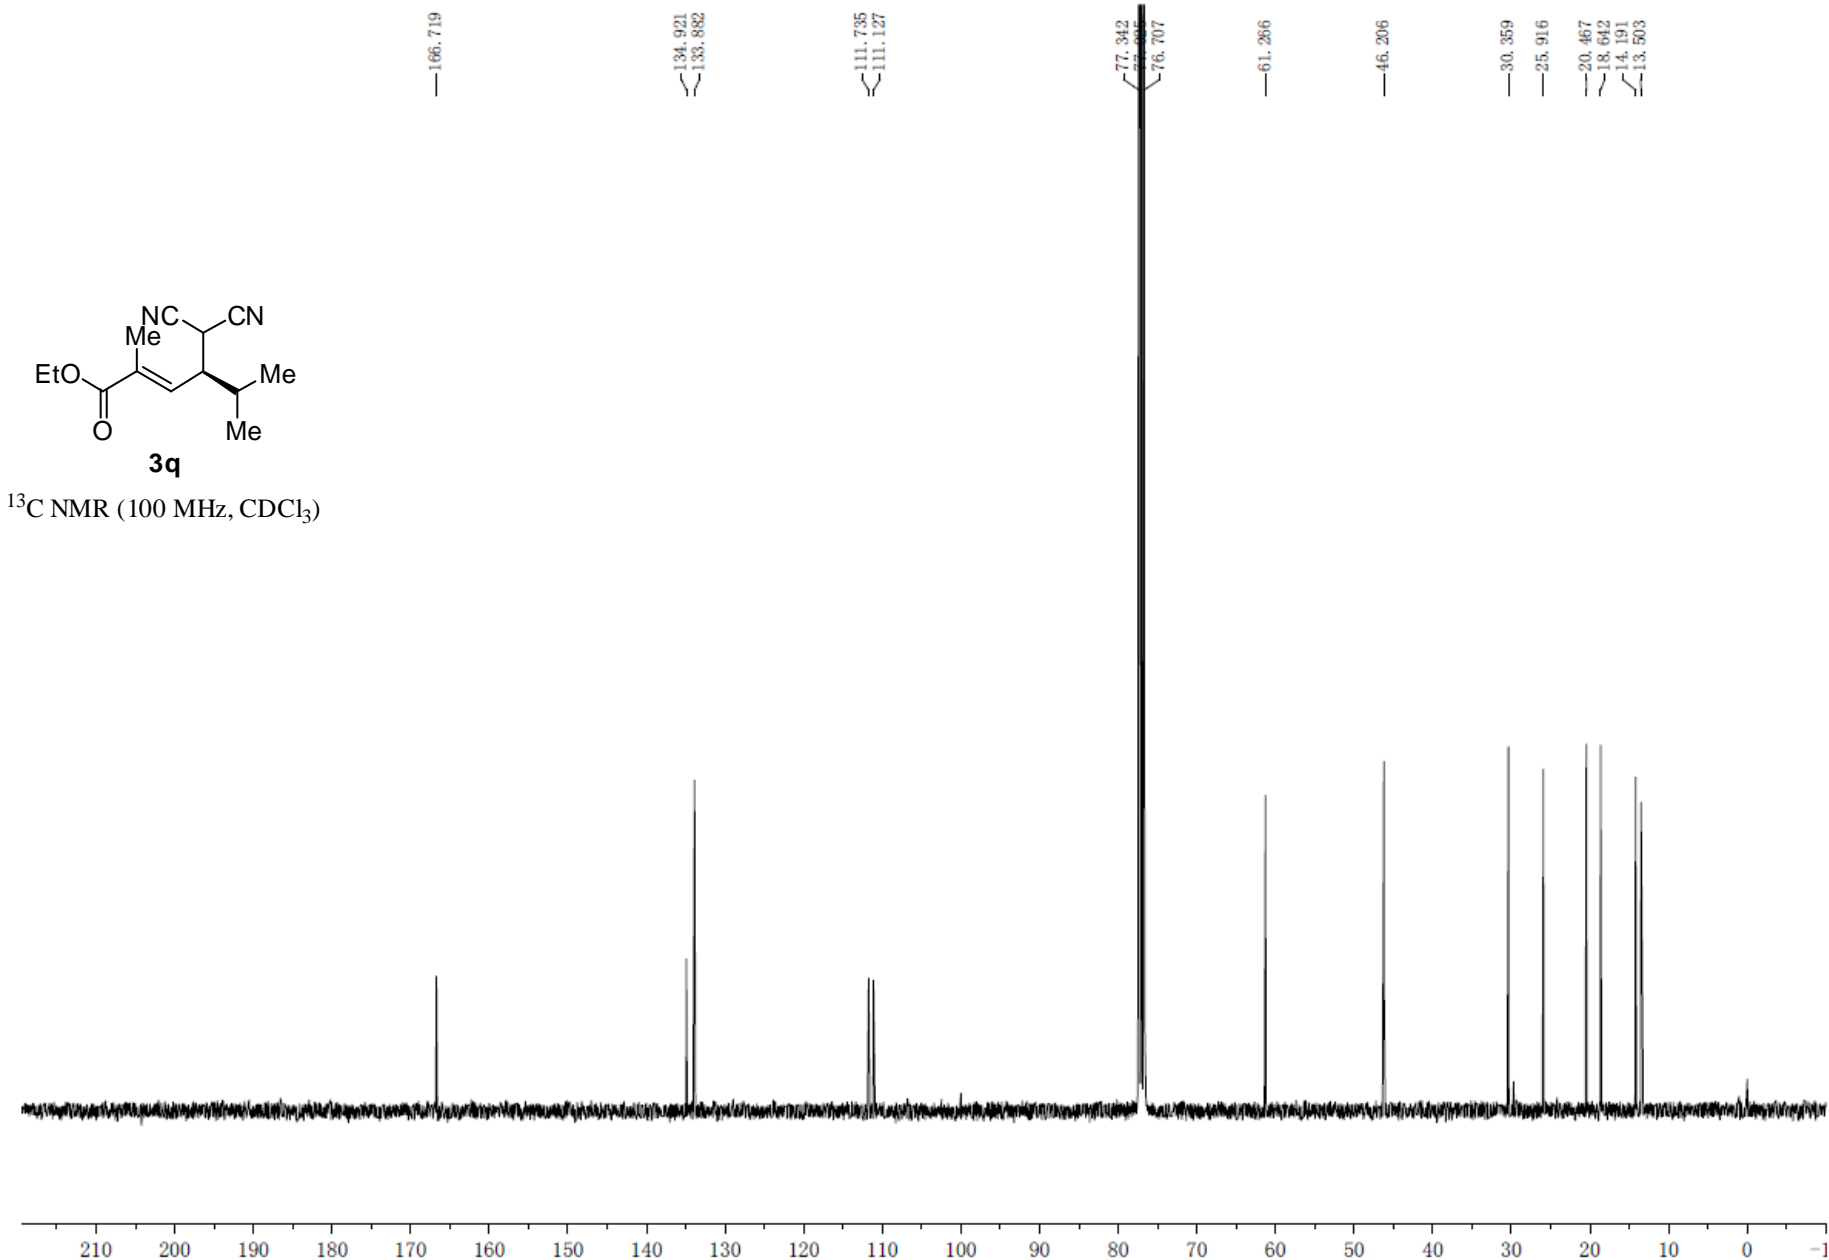

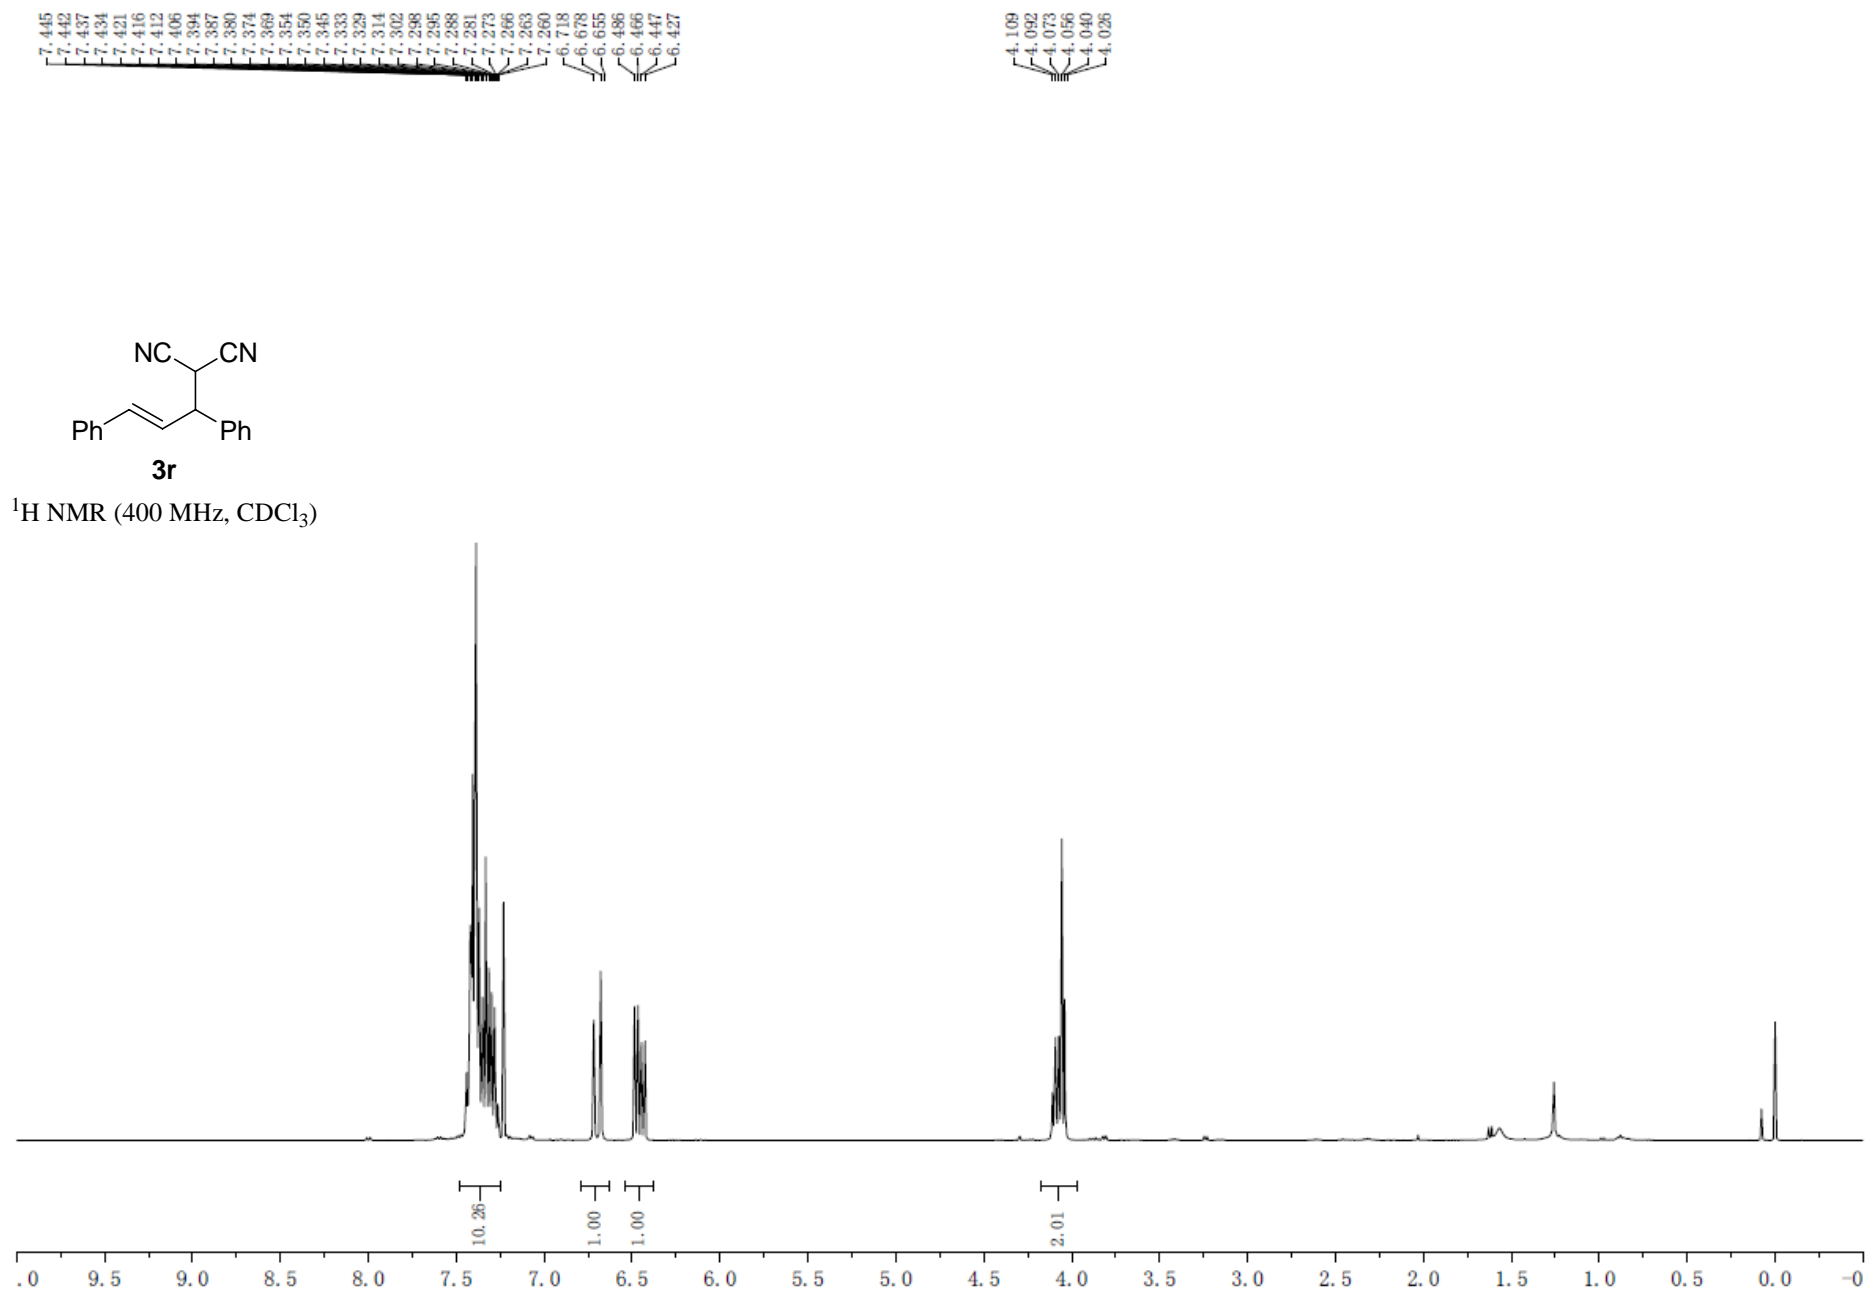



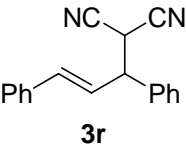

<sup>13</sup>C NMR (100 MHz, CDCl<sub>3</sub>)

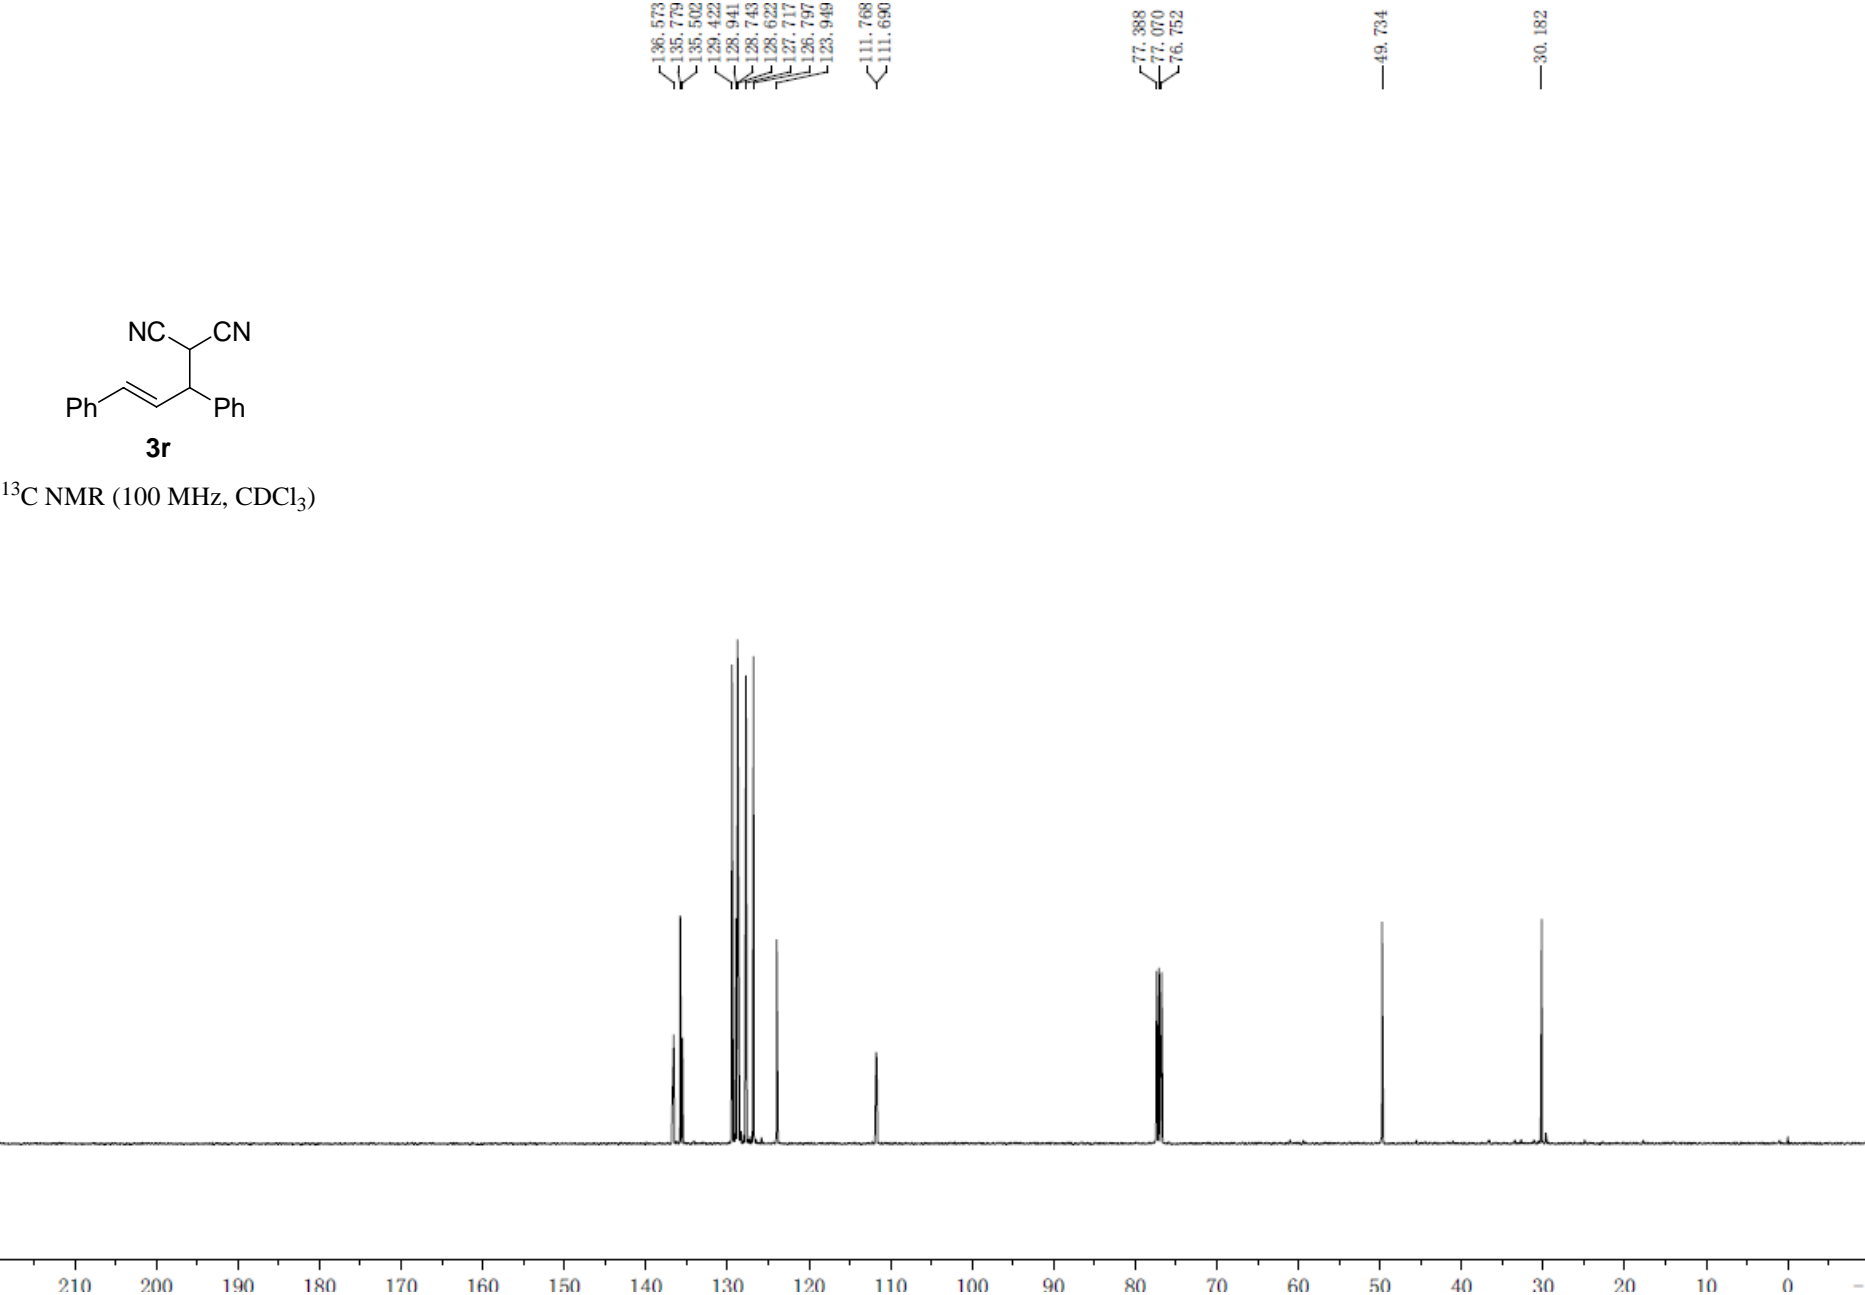

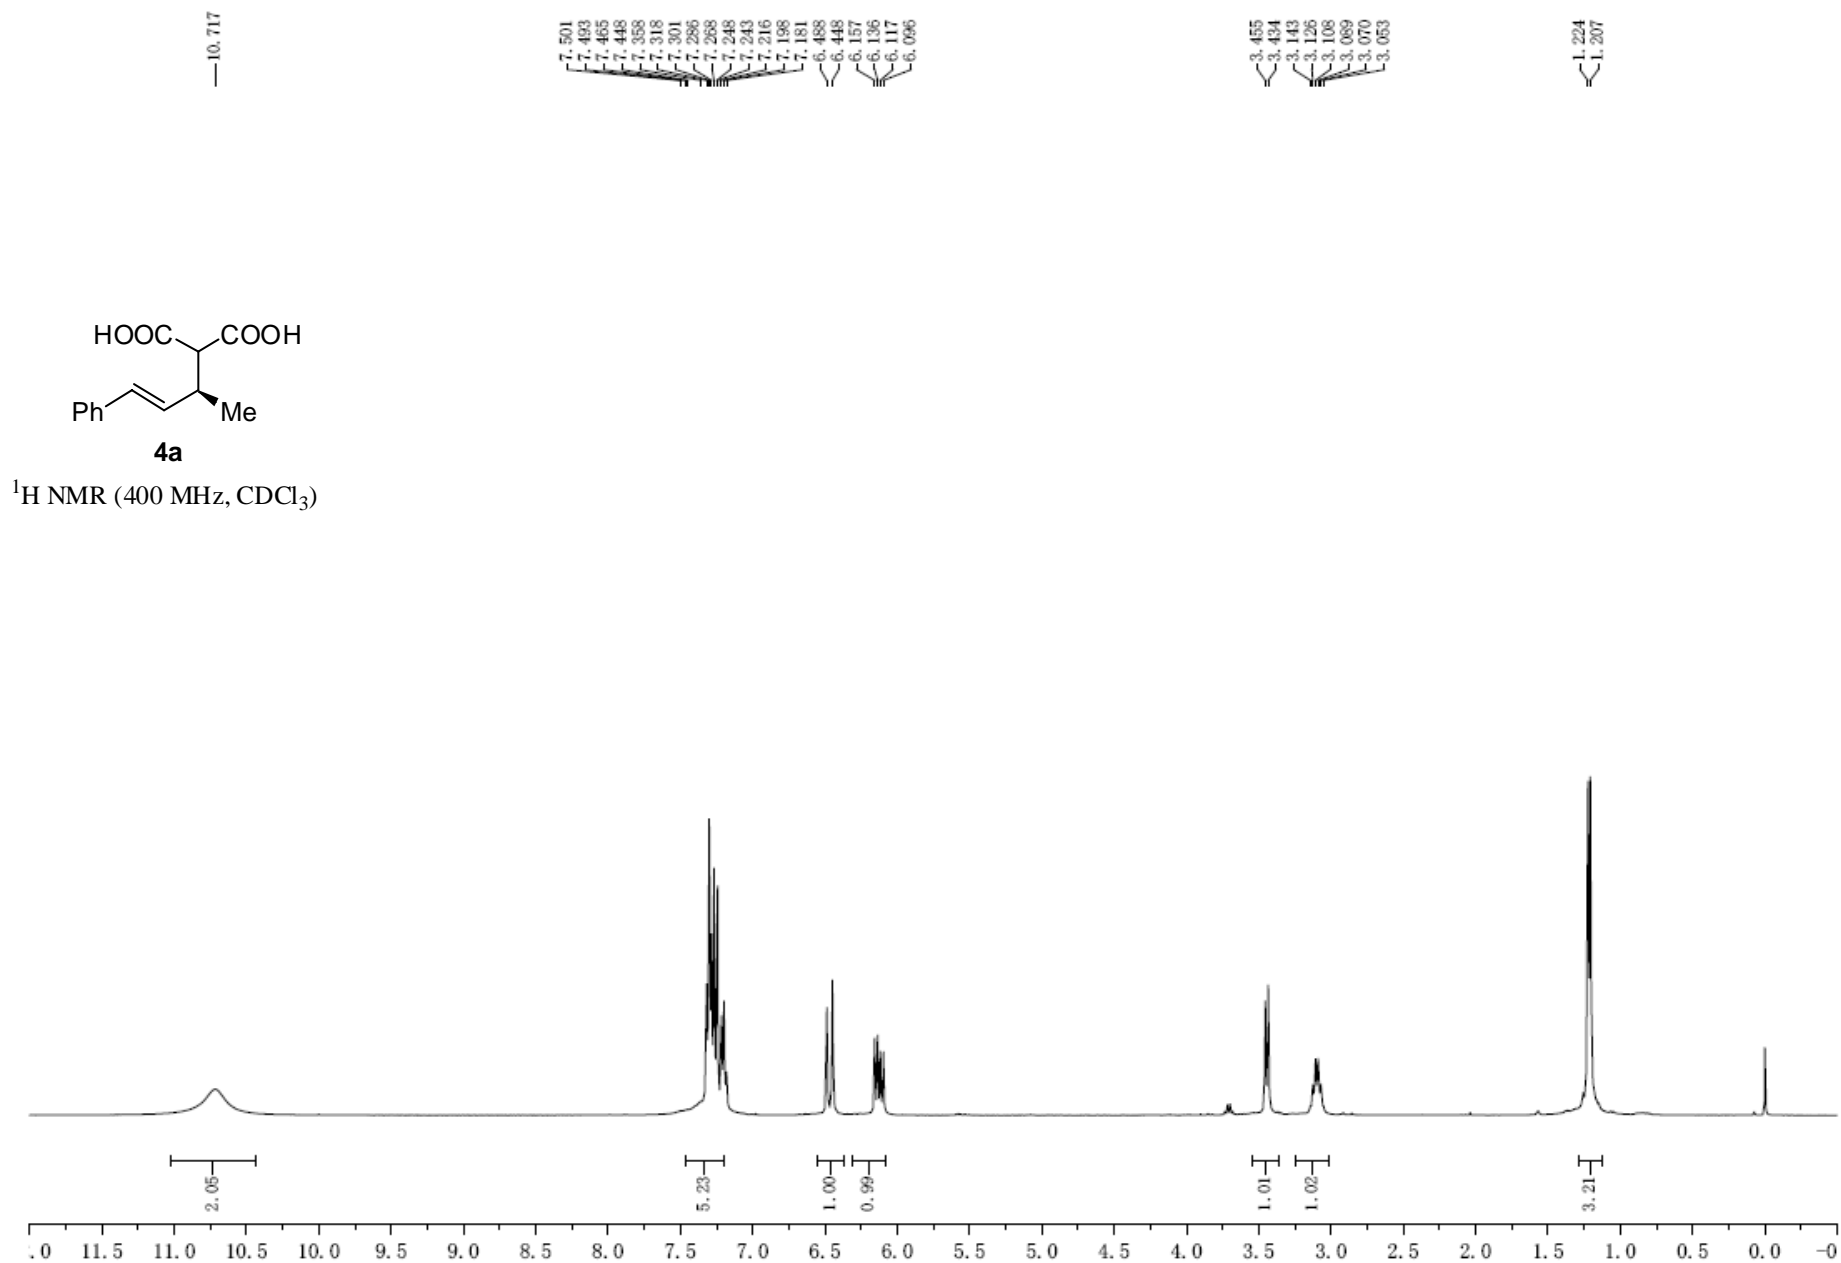

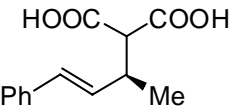

**4a**

<sup>13</sup>C NMR (100 MHz, CDCl<sub>3</sub>)

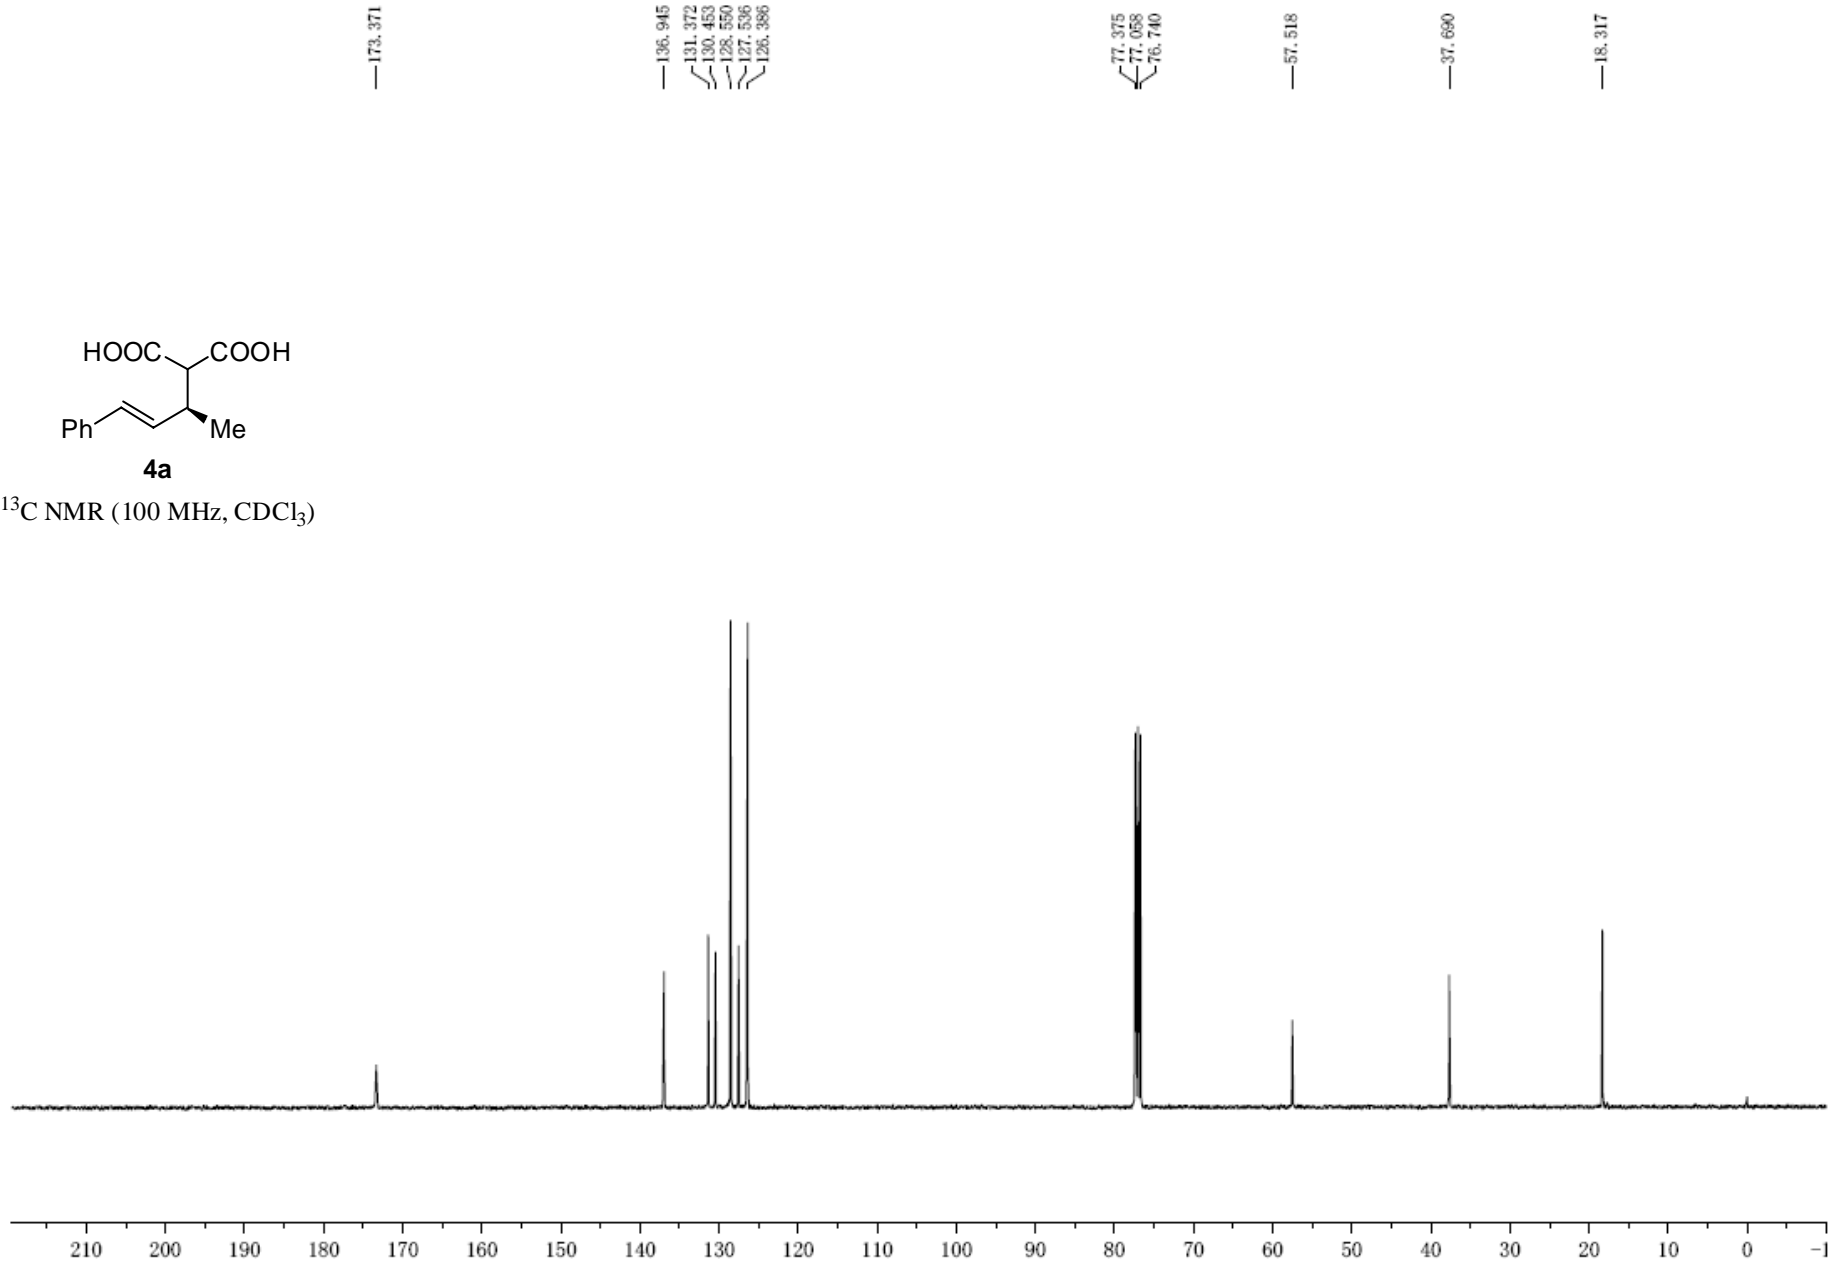

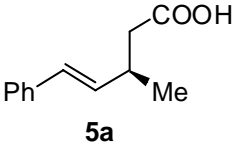

<sup>1</sup>H NMR (400 MHz, CDCl<sub>3</sub>)

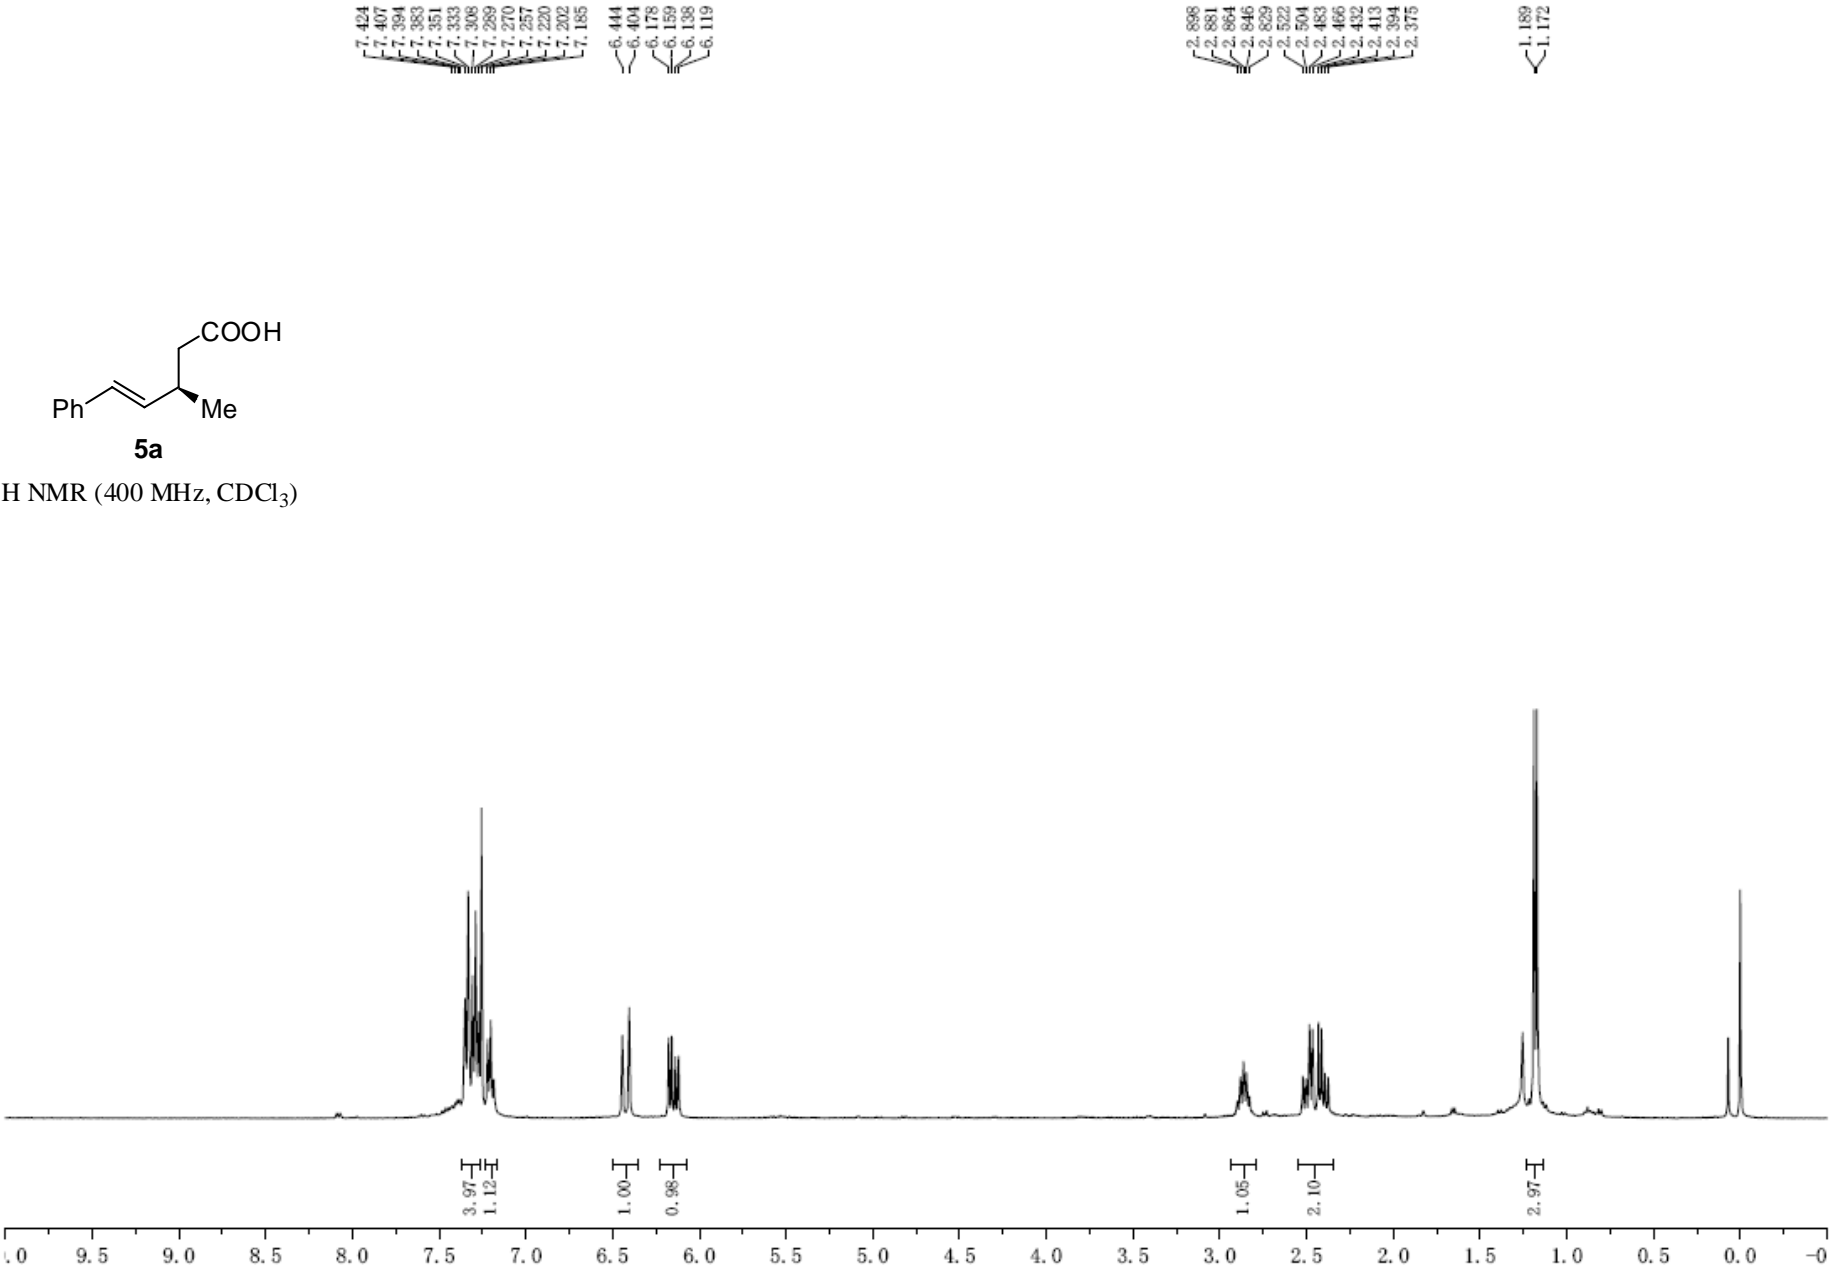

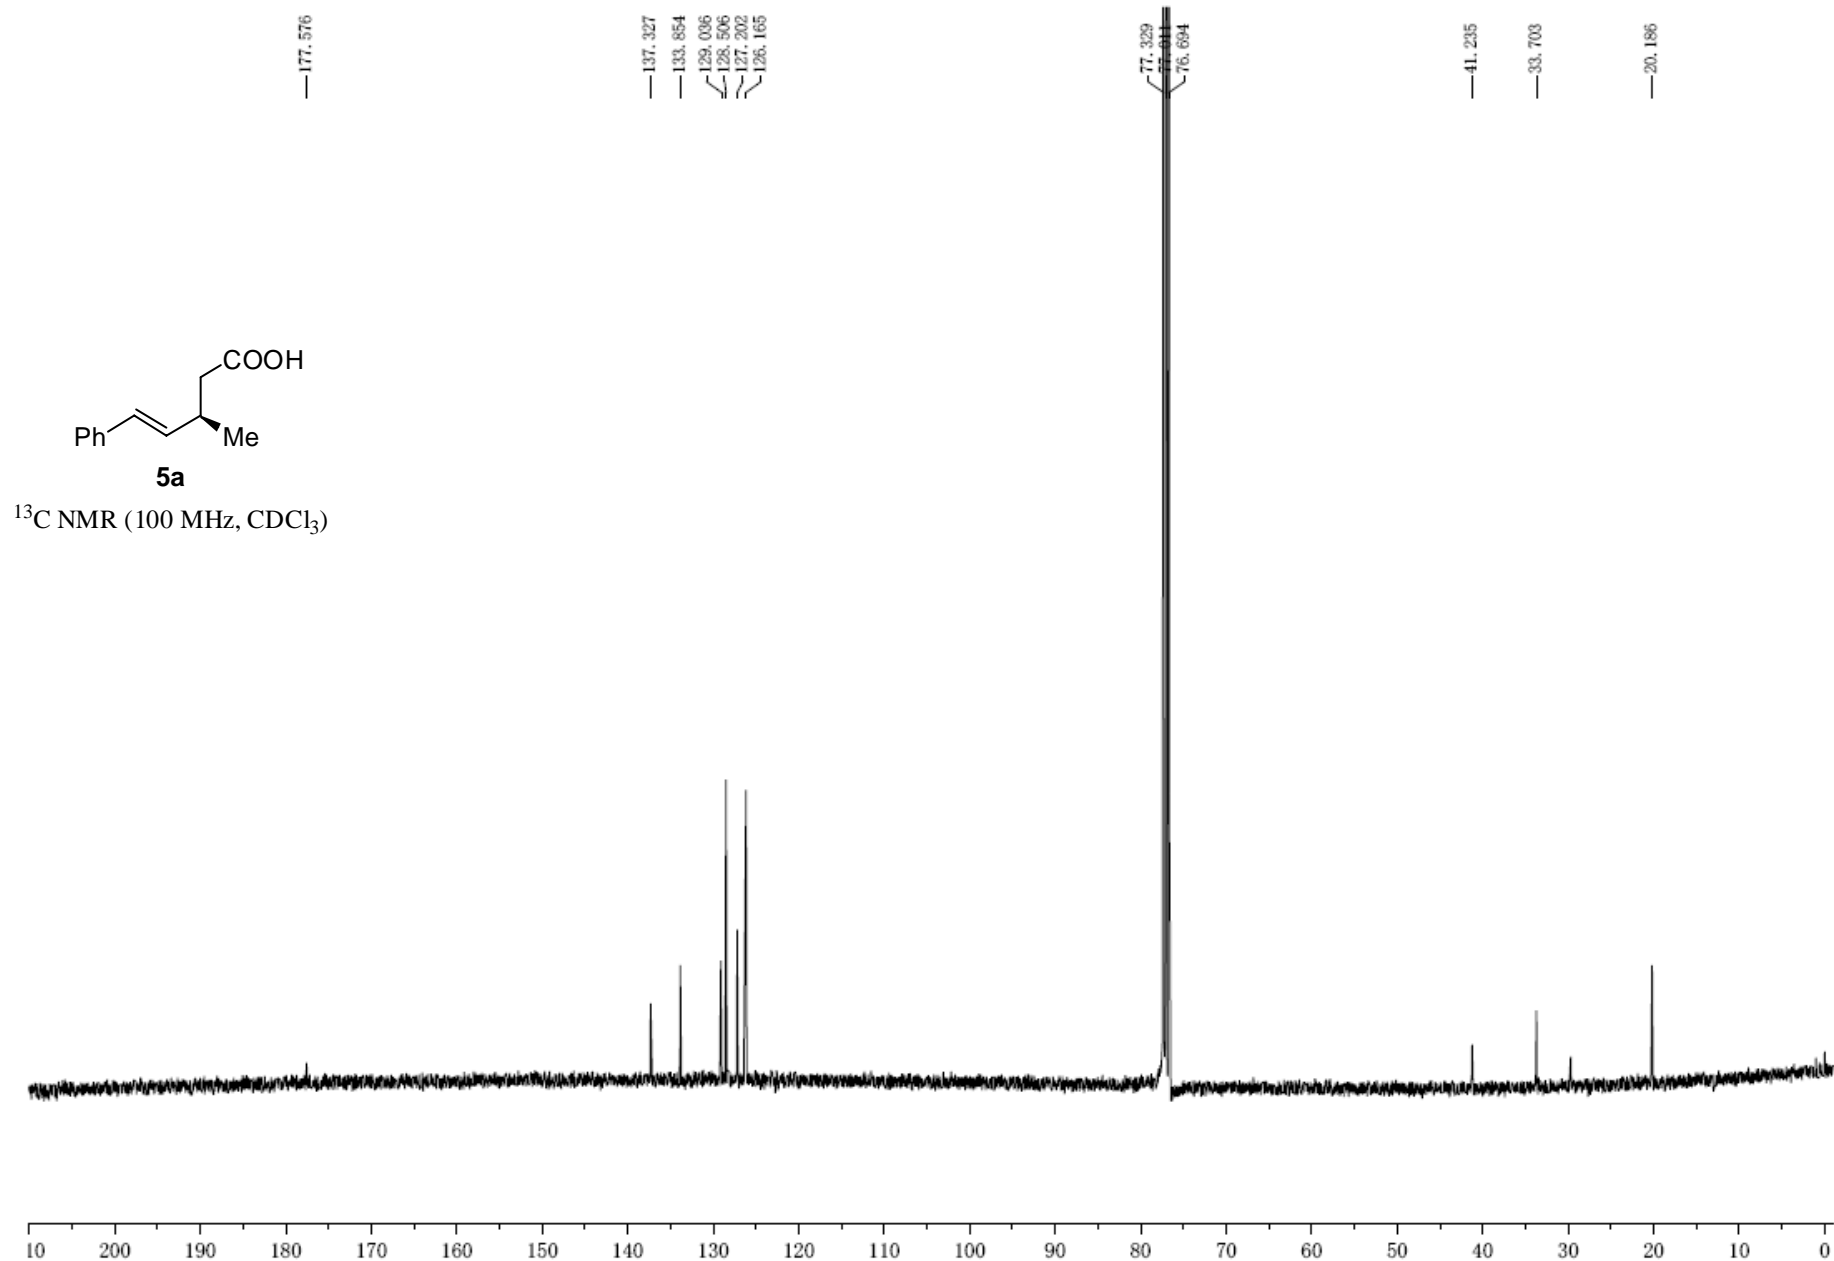

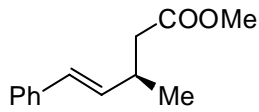

**6a**

<sup>1</sup>H NMR (400 MHz, CDCl<sub>3</sub>)

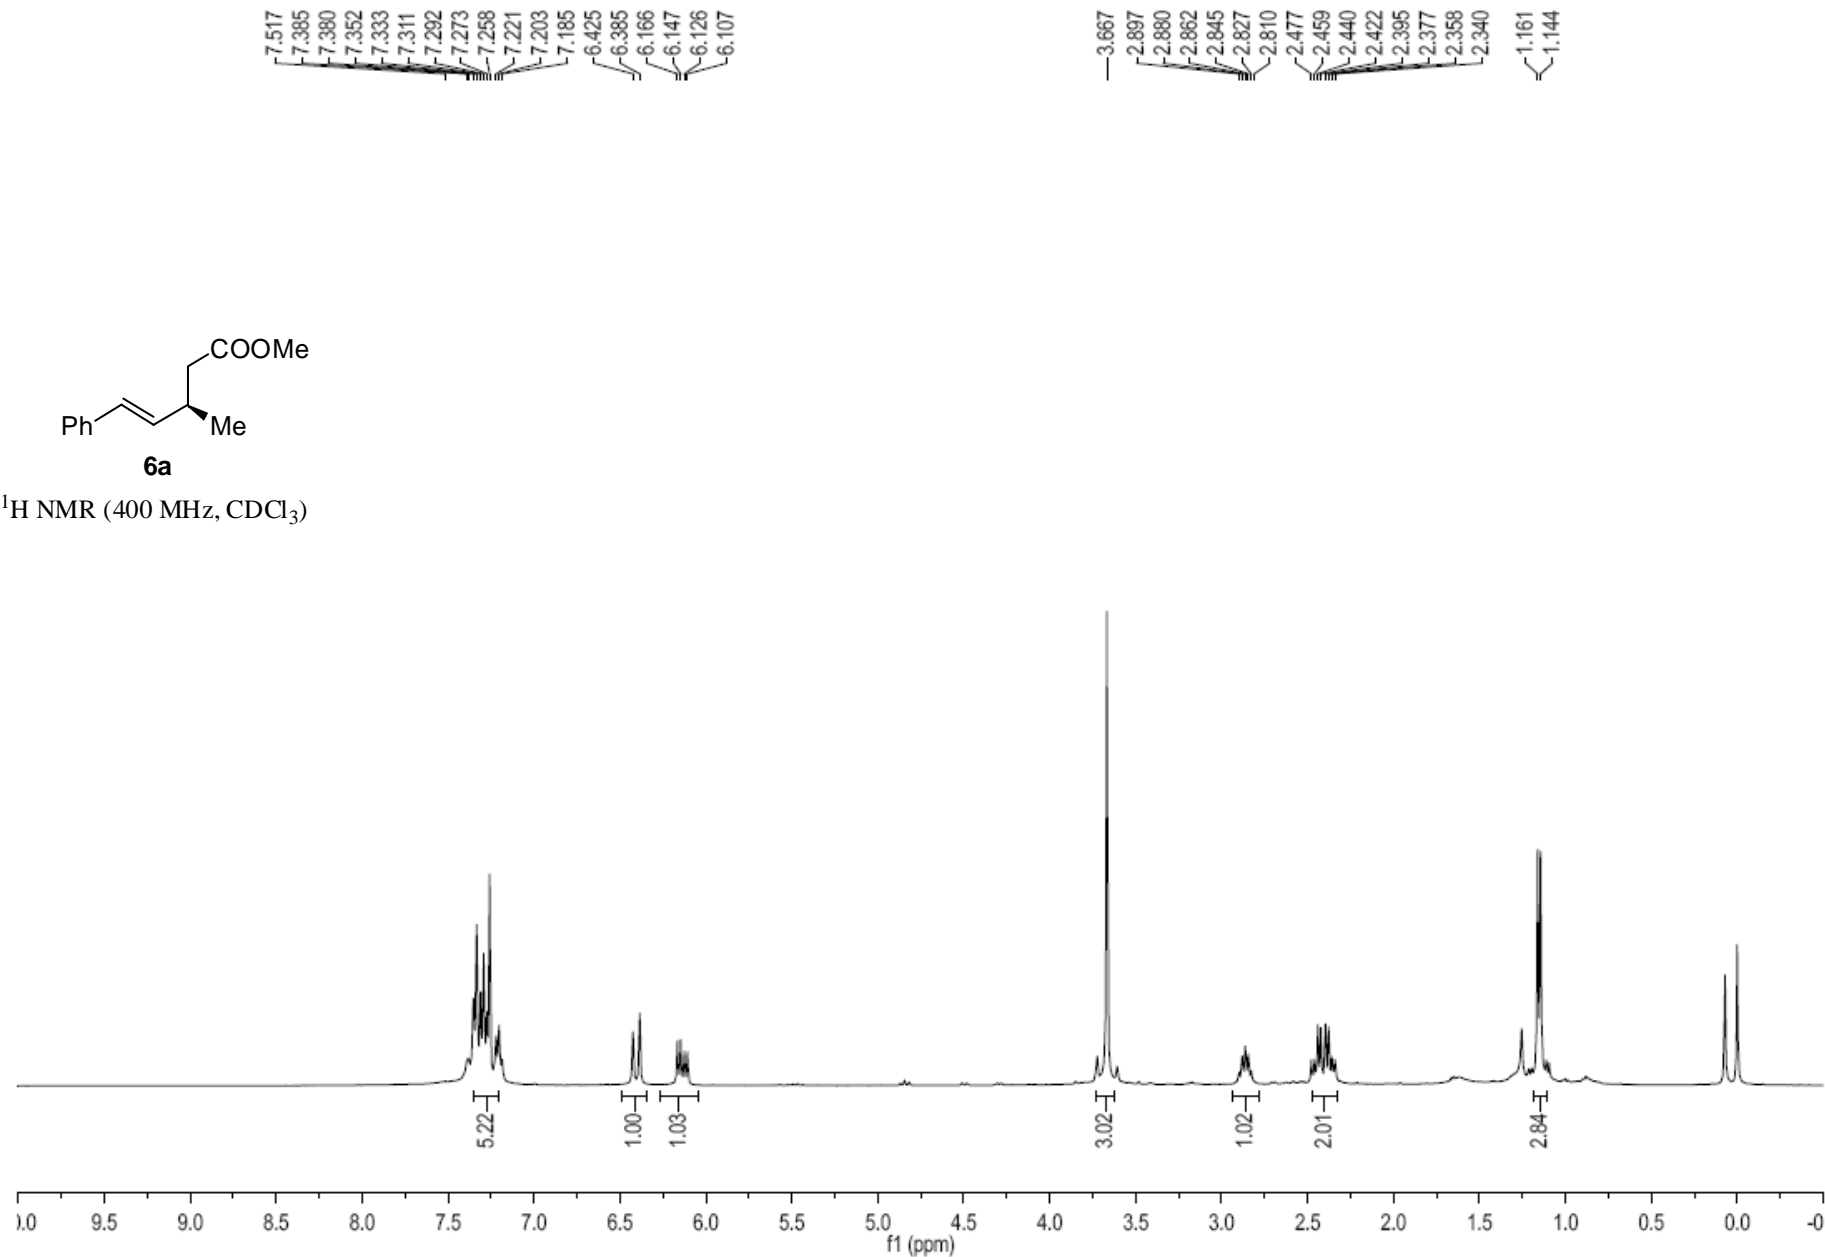

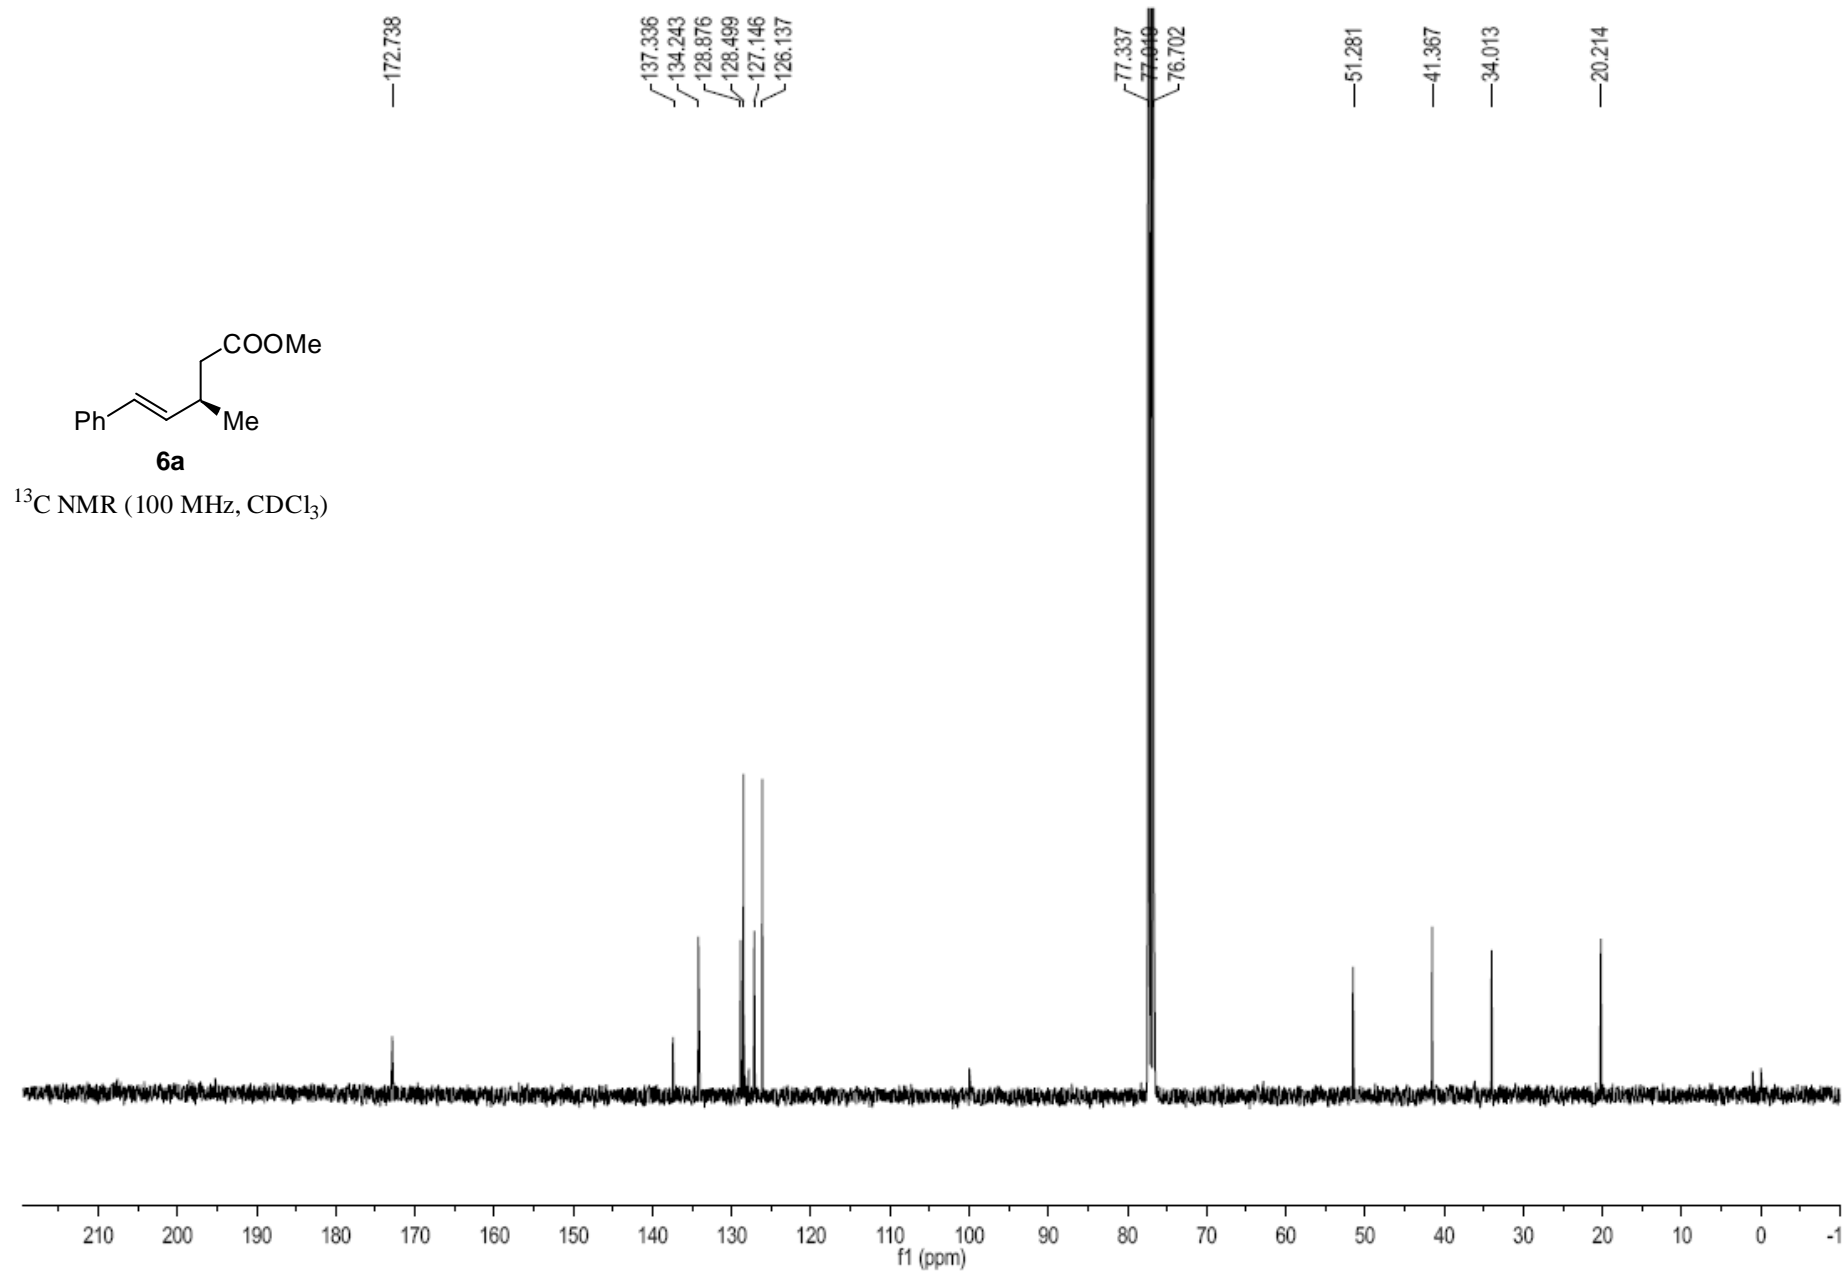

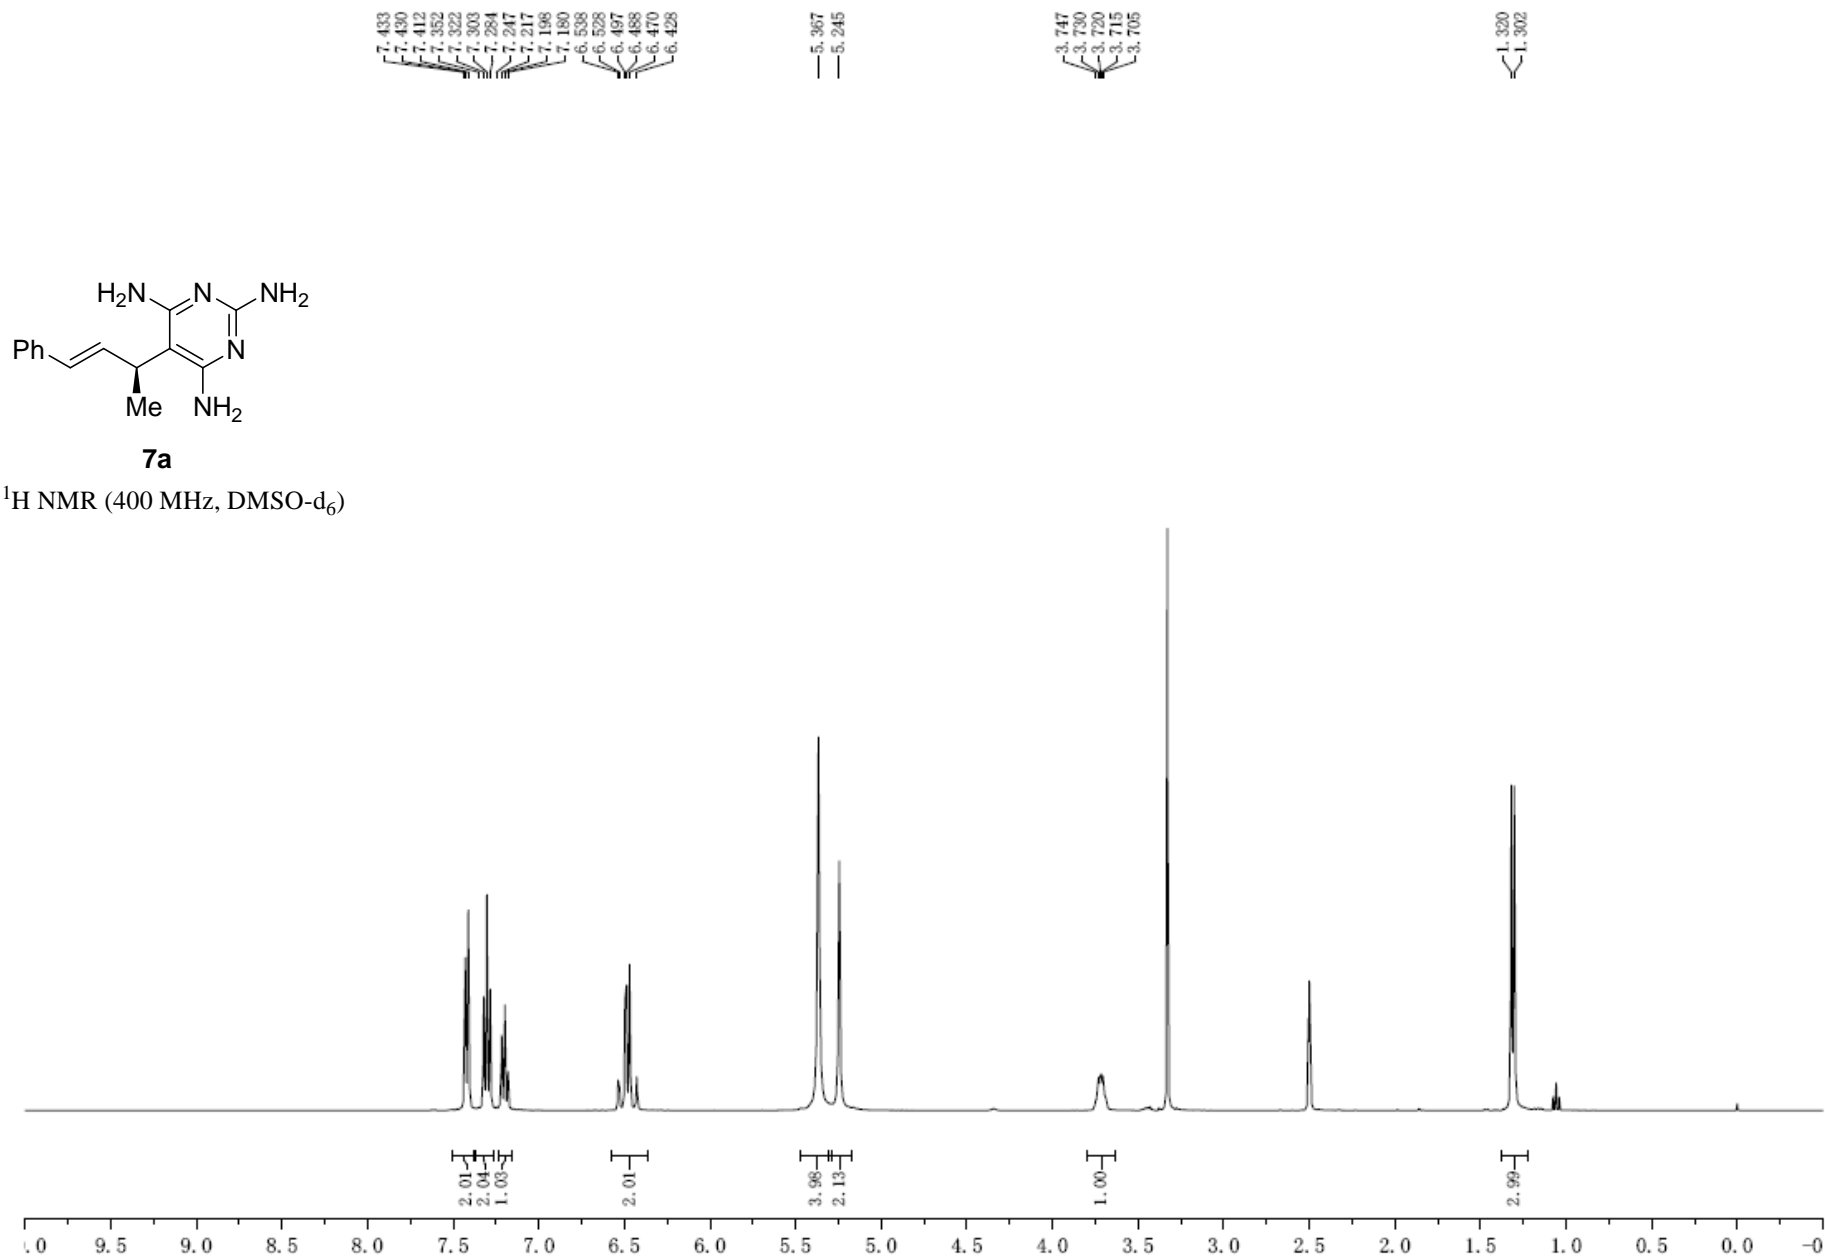



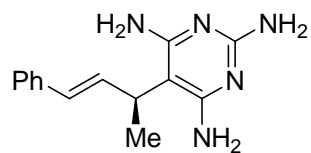

**7a**

$^{13}\text{C}$  NMR (100 MHz,  $\text{DMSO-d}_6$ )

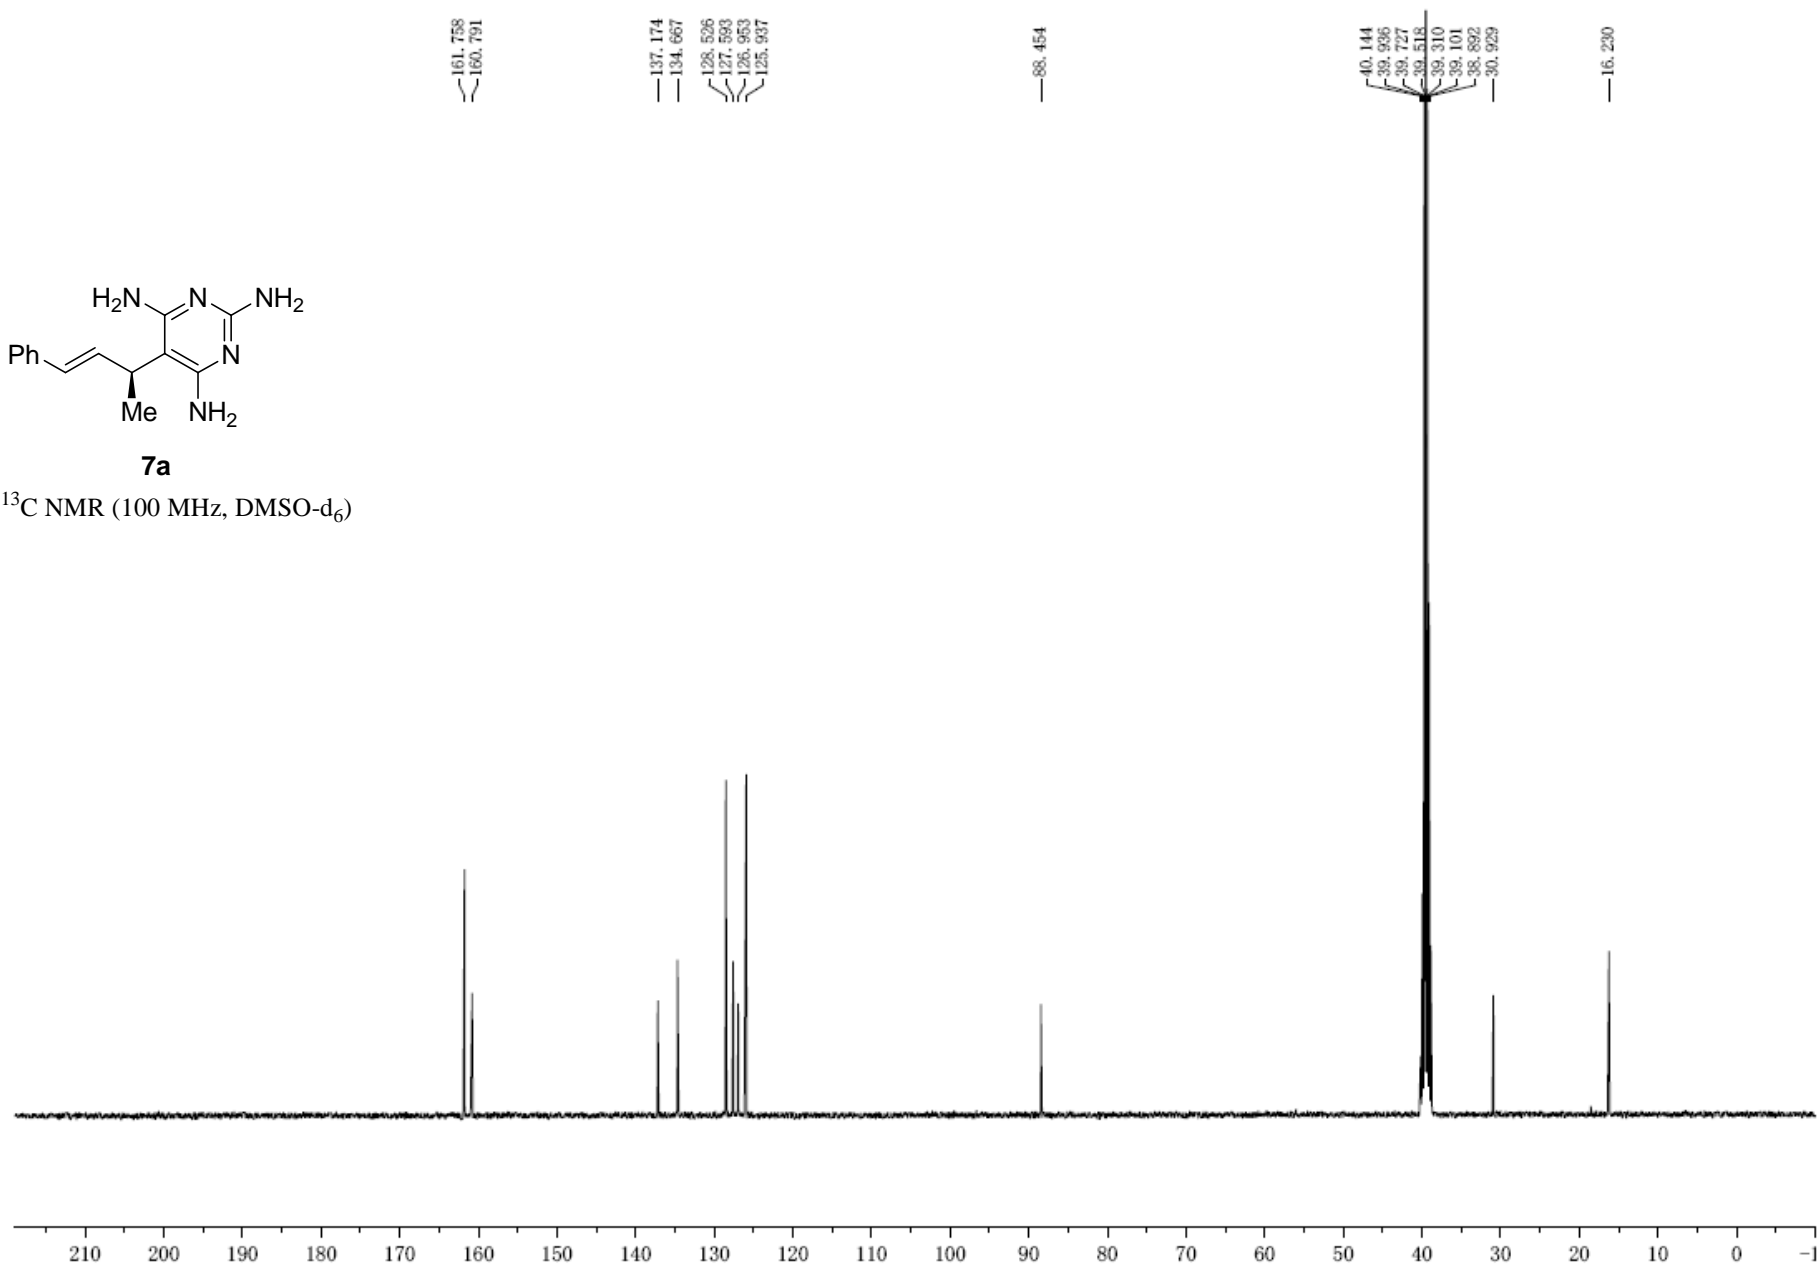

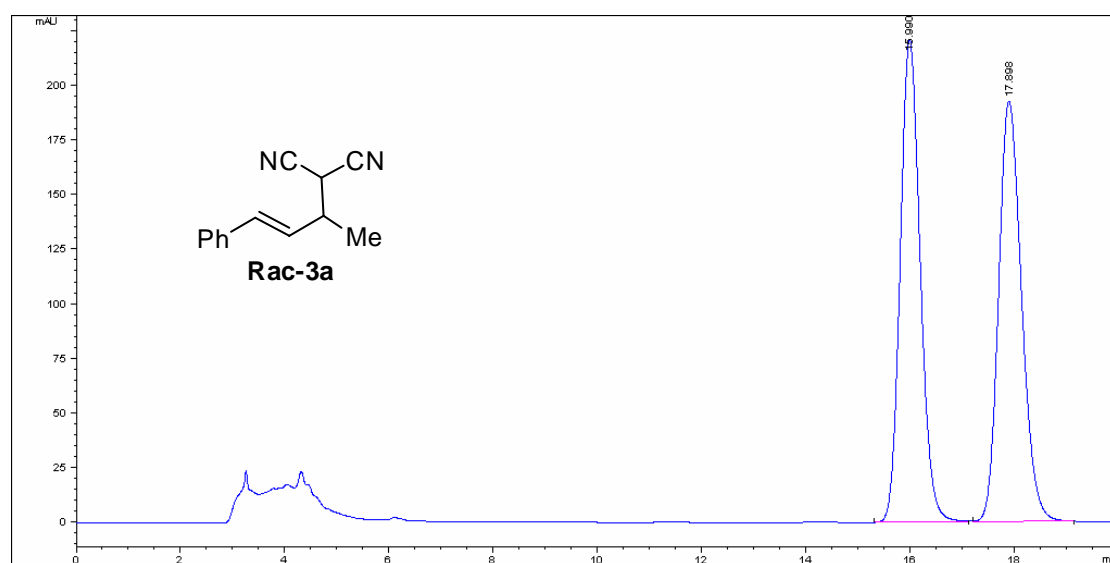

| Number | Time (min) | Area (mAU·s) | Height (mAU) | Width (min) | Symmetry factor | Area (%) |
|--------|------------|--------------|--------------|-------------|-----------------|----------|
| 1      | 15.99      | 5887         | 220.8        | 0.413       | 0.837           | 50.024   |
| 2      | 17.898     | 5881.4       | 192.4        | 0.4731      | 0.782           | 49.976   |

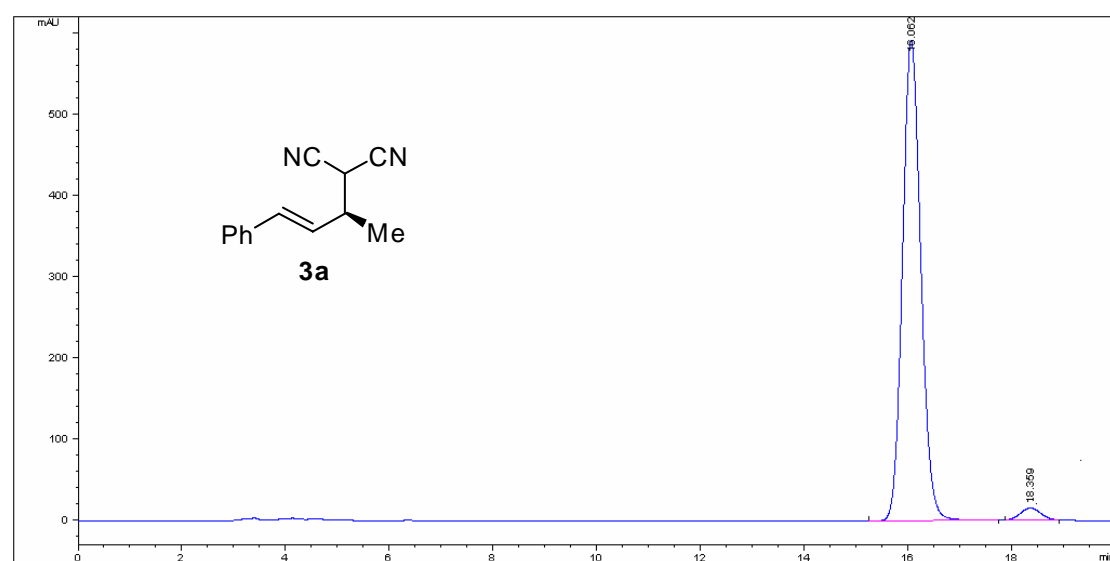

| Number | Time (min) | Area (mAU·s) | Height (mAU) | Width (min) | Symmetry factor | Area (%) |
|--------|------------|--------------|--------------|-------------|-----------------|----------|
| 1      | 16.062     | 14666.6      | 592.6        | 0.4125      | 0.865           | 97.288   |
| 2      | 18.359     | 408.8        | 15           | 0.4541      | 0.911           | 2.712    |

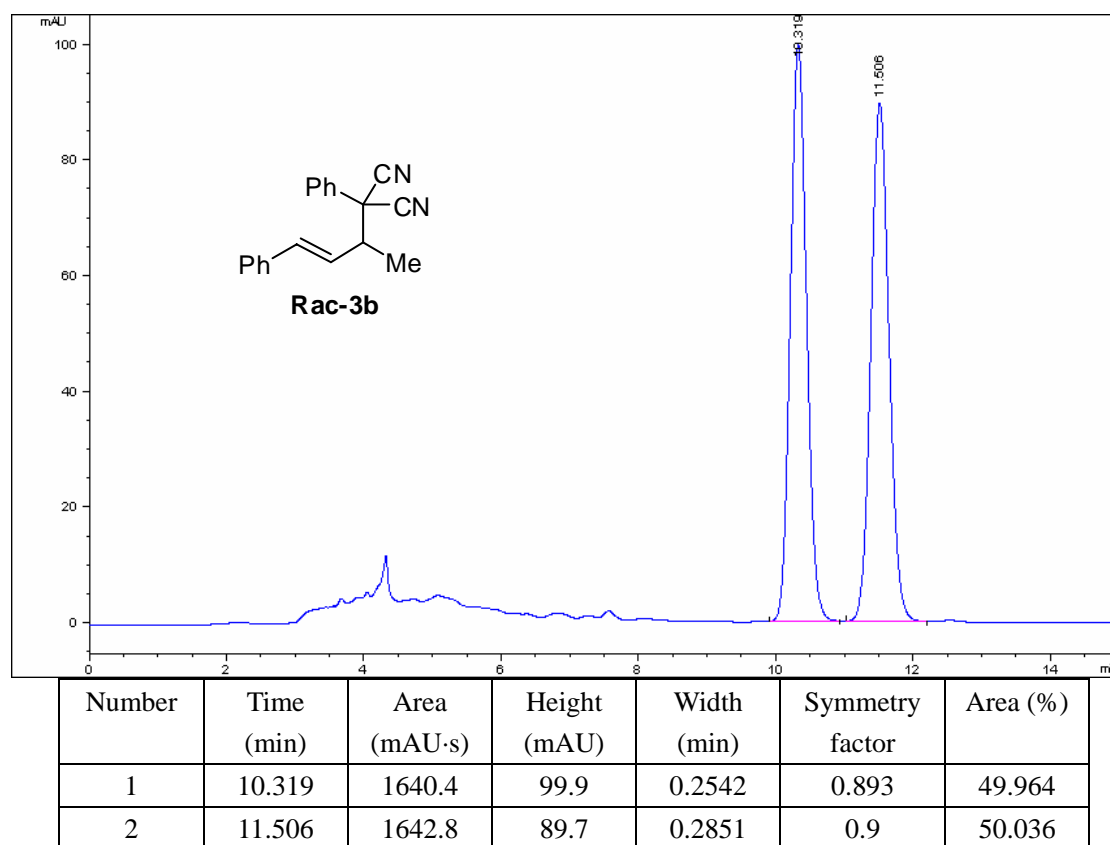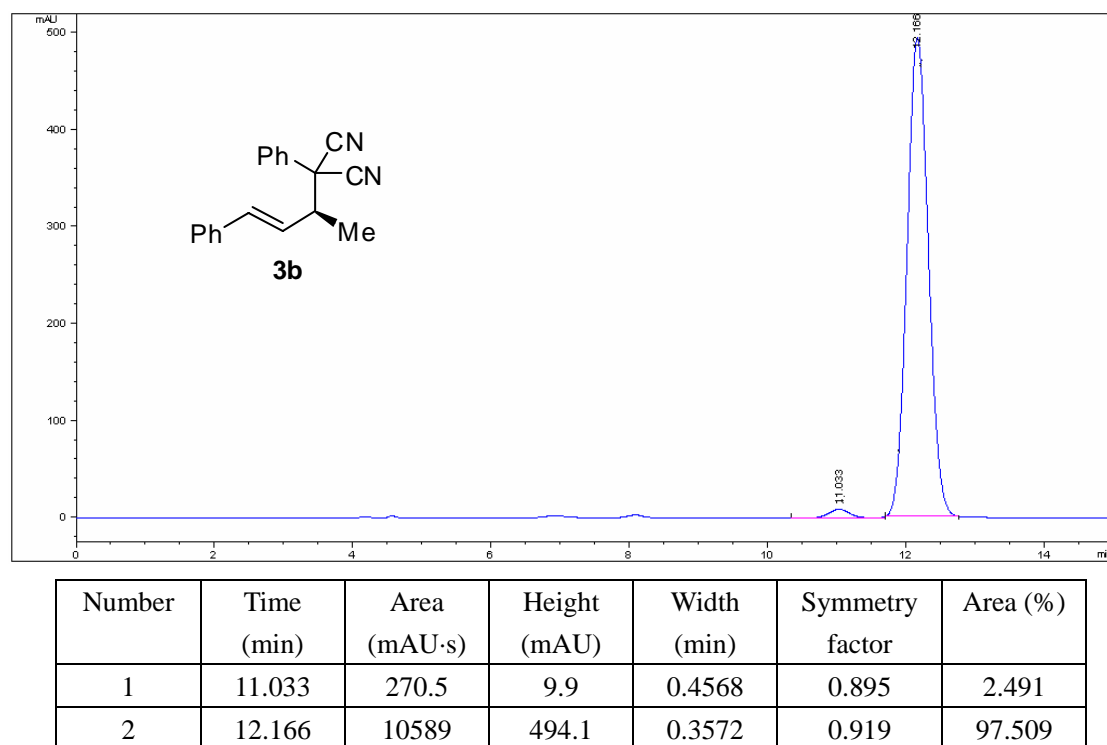

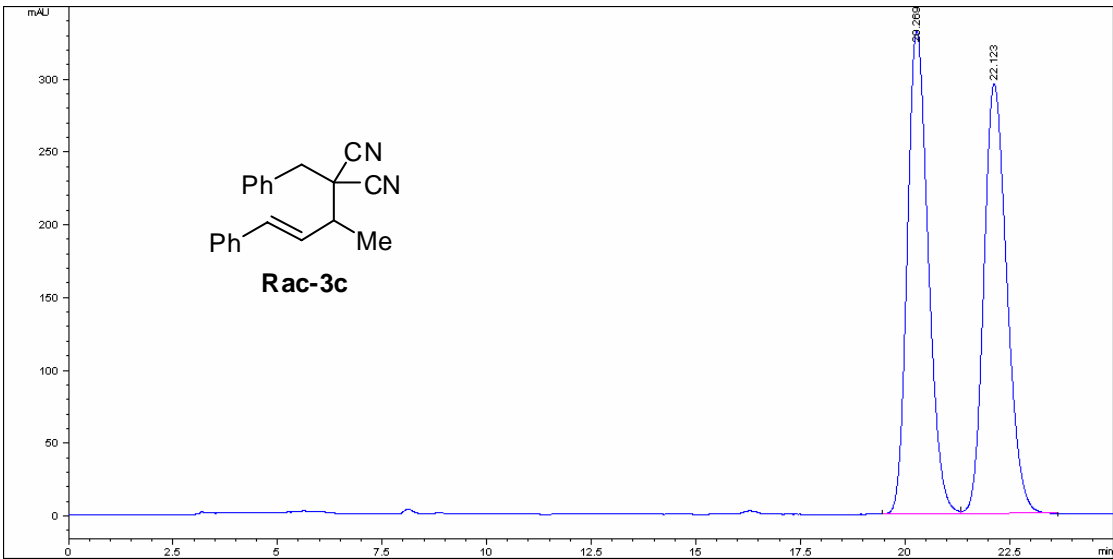

| Number | Time (min) | Area (mAU·s) | Height (mAU) | Width (min) | Symmetry factor | Area (%) |
|--------|------------|--------------|--------------|-------------|-----------------|----------|
| 1      | 20.269     | 11562.1      | 332.2        | 0.5401      | 0.764           | 50.522   |
| 2      | 22.123     | 11323        | 295.2        | 0.5931      | 0.771           | 49.478   |

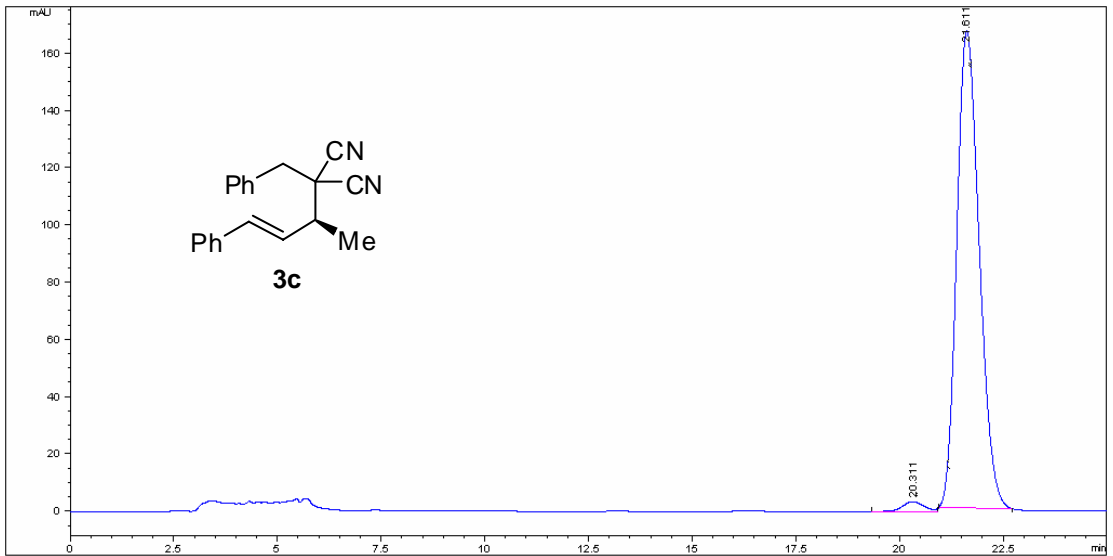

| Number | Time (min) | Area (mAU·s) | Height (mAU) | Width (min) | Symmetry factor | Area (%) |
|--------|------------|--------------|--------------|-------------|-----------------|----------|
| 1      | 20.311     | 153.7        | 3.8          | 0.6801      | 0.954           | 2.383    |
| 2      | 21.611     | 6294.9       | 166.9        | 0.6285      | 0.775           | 97.617   |

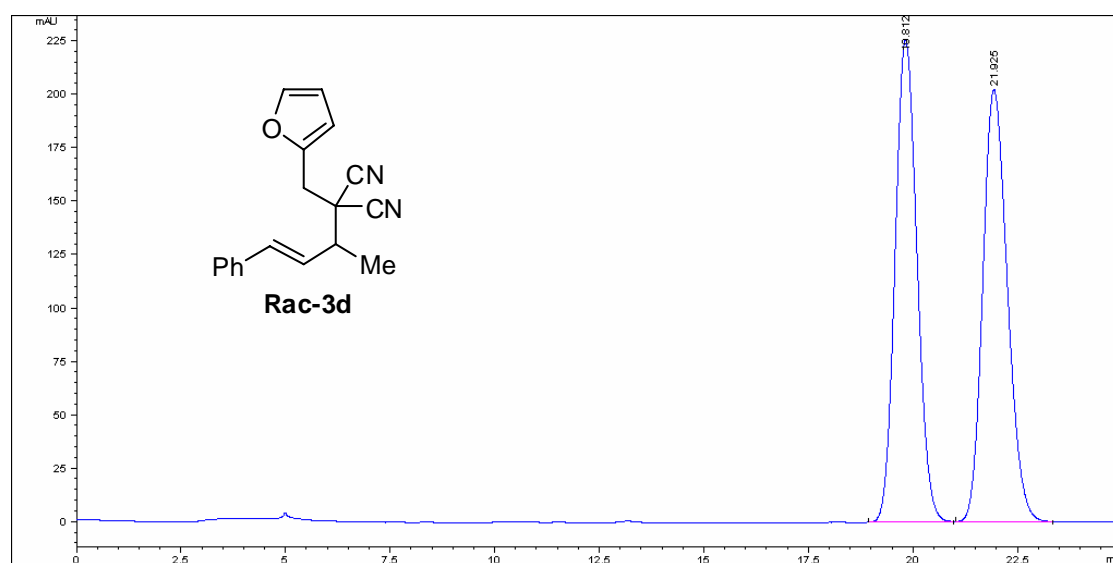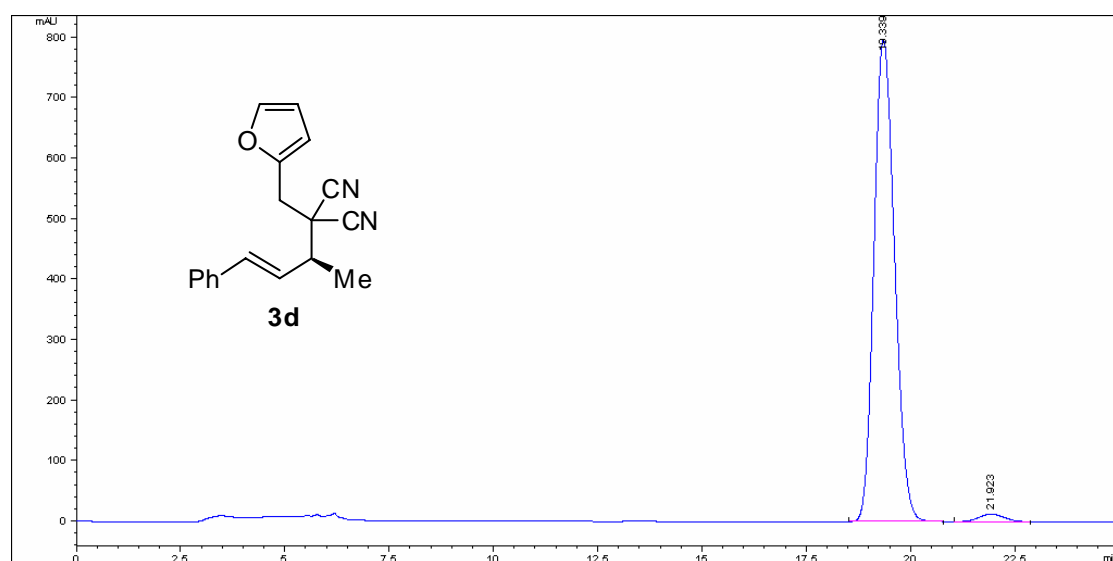

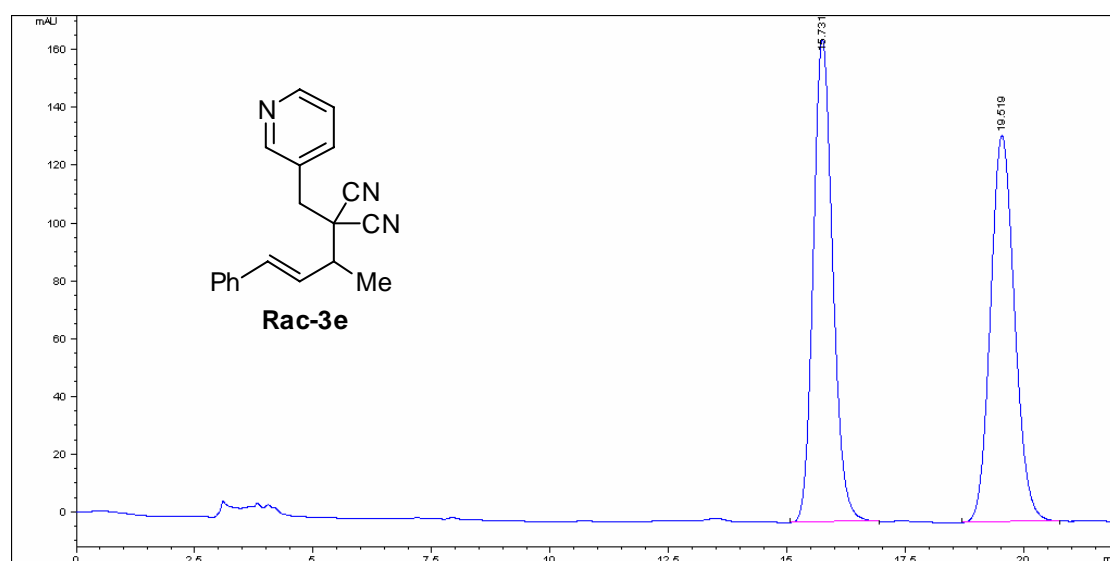

| Number | Time (min) | Area (mAU·s) | Height (mAU) | Width (min) | Symmetry factor | Area (%) |
|--------|------------|--------------|--------------|-------------|-----------------|----------|
| 1      | 15.731     | 4778.7       | 16.7         | 0.4416      | 0.827           | 50.260   |
| 2      | 19.519     | 4729.2       | 133.8        | 0.5478      | 0.864           | 49.740   |

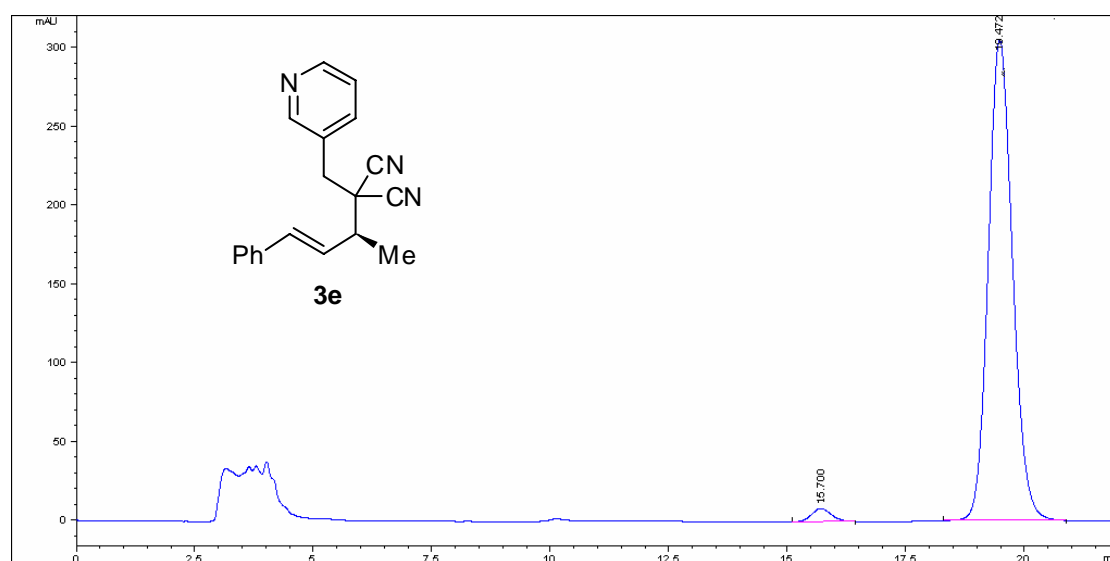

| Number | Time (min) | Area (mAU·s) | Height (mAU) | Width (min) | Symmetry factor | Area (%) |
|--------|------------|--------------|--------------|-------------|-----------------|----------|
| 1      | 15.7       | 261.5        | 8.5          | 0.5112      | 0.859           | 2.353    |
| 2      | 19.472     | 10852.1      | 305.2        | 0.5926      | 0.858           | 97.647   |

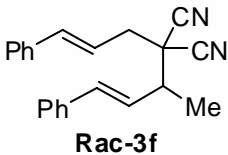

| Number | Time<br>(min) | Area<br>(mAU·s) | Height<br>(mAU) | Width<br>(min) | Symmetry<br>factor | Area (%) |
|--------|---------------|-----------------|-----------------|----------------|--------------------|----------|
| 1      | 17.552        | 8157.9          | 260.5           | 0.4847         | 0.732              | 50.088   |
| 2      | 20.099        | 8129.3          | 225.8           | 0.554          | 0.765              | 49.912   |

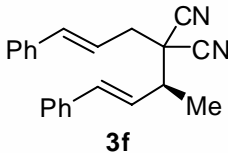

| Number | Time (min) | Area (mAU·s) | Height (mAU) | Width (min) | Symmetry factor | Area (%) |
|--------|------------|--------------|--------------|-------------|-----------------|----------|
| 1      | 17.389     | 369.4        | 8.6          | 0.716       | 0.784           | 2.312    |
| 2      | 20.203     | 15608.9      | 386.6        | 0.6729      | 0.822           | 97.688   |

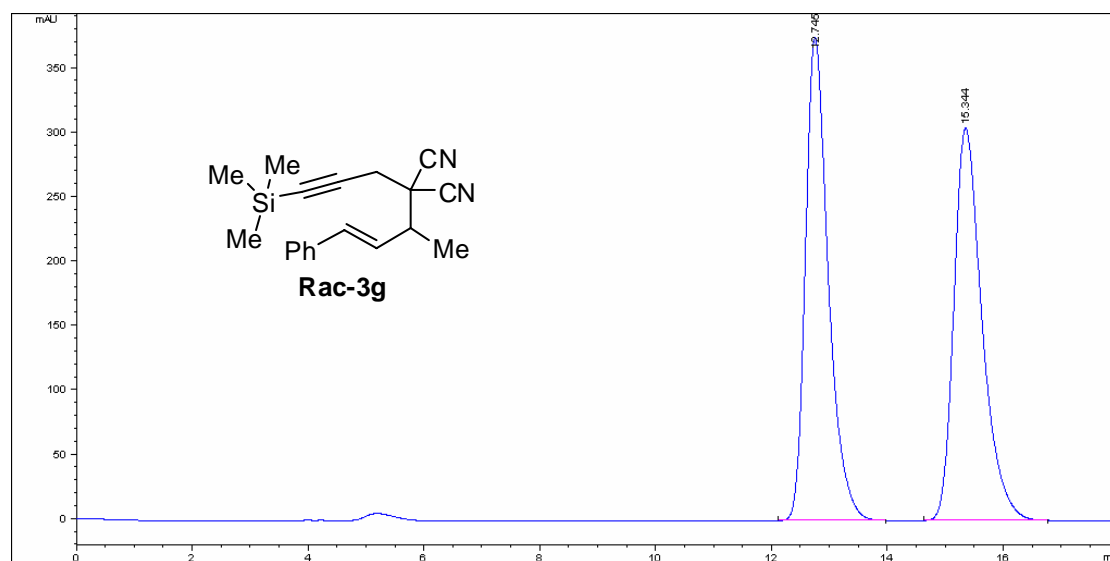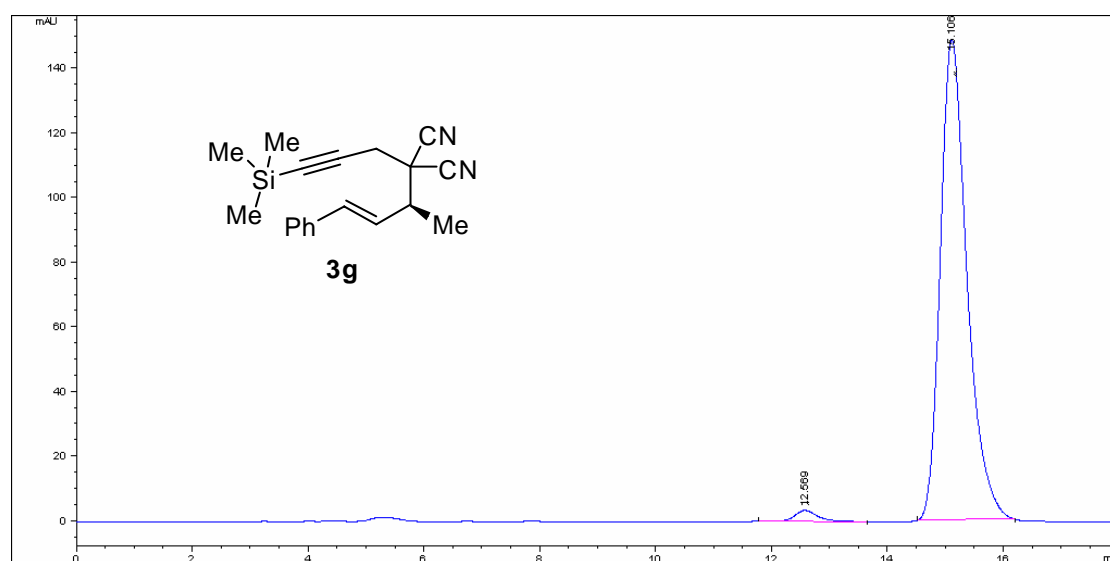



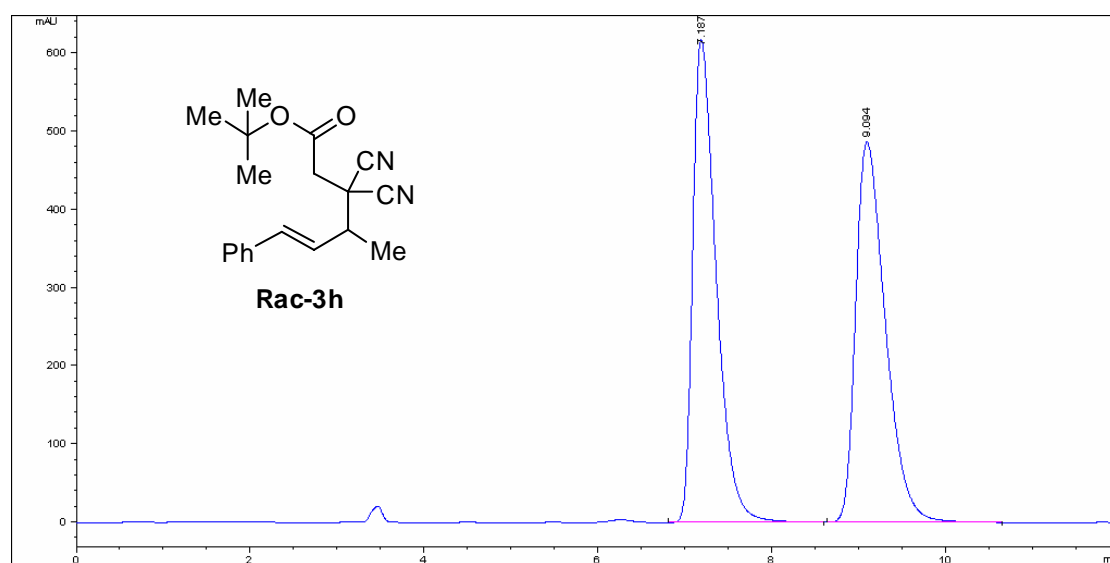

| Number | Time (min) | Area (mAU·s) | Height (mAU) | Width (min) | Symmetry factor | Area (%) |
|--------|------------|--------------|--------------|-------------|-----------------|----------|
| 1      | 7.187      | 11603.2      | 617.7        | 0.2861      | 0.527           | 50.099   |
| 2      | 9.094      | 11557.5      | 487          | 0.3642      | 0.571           | 49.901   |

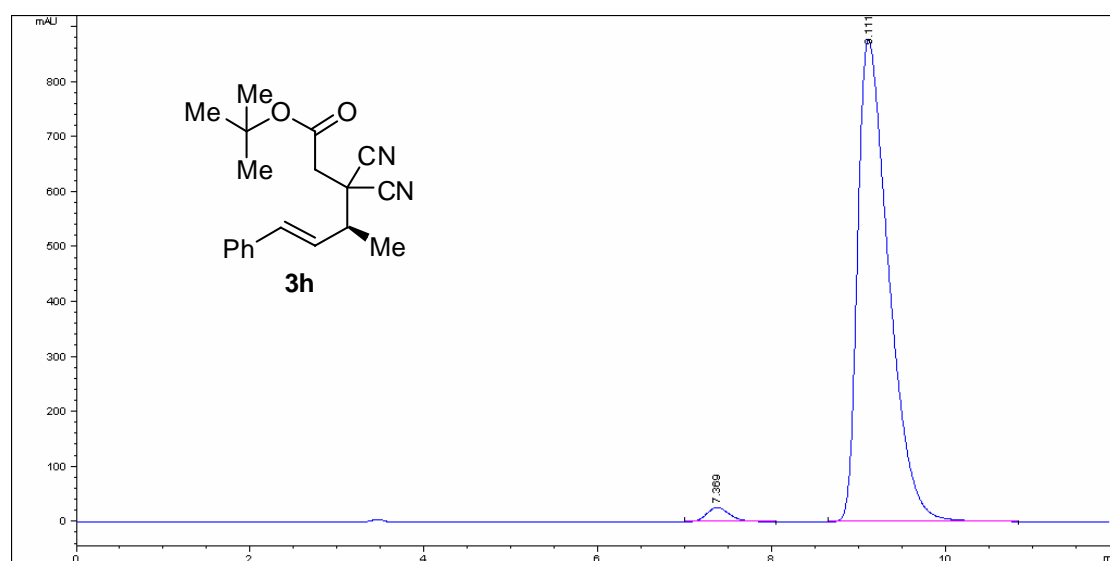

| Number | Time (min) | Area (mAU·s) | Height (mAU) | Width (min) | Symmetry factor | Area (%) |
|--------|------------|--------------|--------------|-------------|-----------------|----------|
| 1      | 7.369      | 480          | 26           | 0.2837      | 0.779           | 2.164    |
| 2      | 9.111      | 21701.3      | 877.3        | 0.3774      | 0.495           | 97.836   |

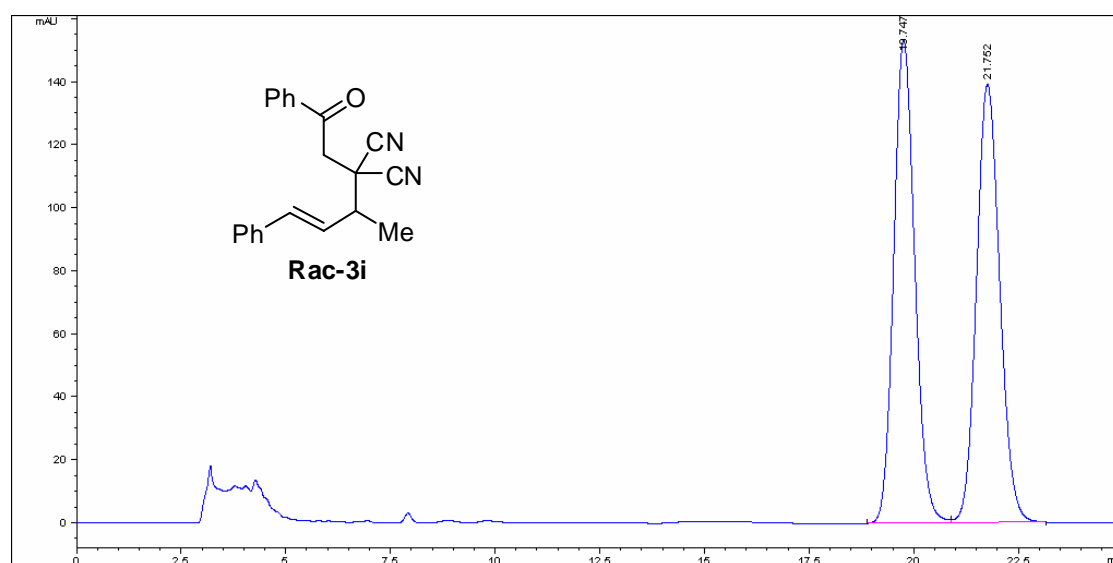

| Number | Time (min) | Area (mAU·s) | Height (mAU) | Width (min) | Symmetry factor | Area (%) |
|--------|------------|--------------|--------------|-------------|-----------------|----------|
| 1      | 19.747     | 5371.5       | 153.5        | 0.5423      | 0.844           | 49.884   |
| 2      | 21.752     | 5396.4       | 139.2        | 0.6008      | 0.862           | 50.116   |

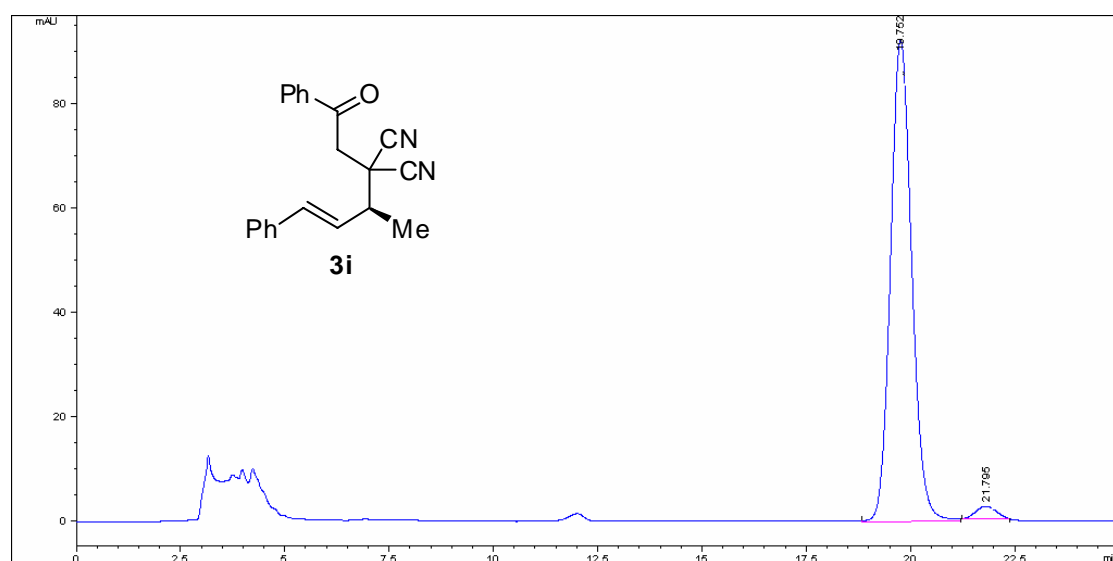

| Number | Time (min) | Area (mAU·s) | Height (mAU) | Width (min) | Symmetry factor | Area (%) |
|--------|------------|--------------|--------------|-------------|-----------------|----------|
| 1      | 19.752     | 3270.6       | 92.4         | 0.5898      | 0.867           | 97.232   |
| 2      | 21.795     | 93.1         | 2.6          | 0.6039      | 0.96            | 2.768    |

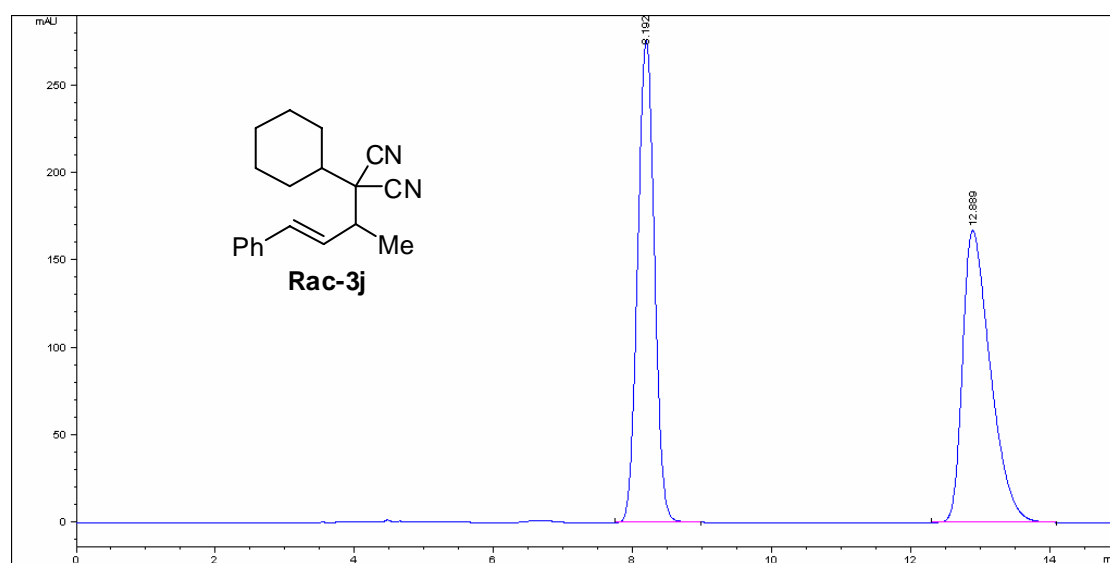

| Number | Time (min) | Area (mAU·s) | Height (mAU) | Width (min) | Symmetry factor | Area (%) |
|--------|------------|--------------|--------------|-------------|-----------------|----------|
| 1      | 8.192      | 4628.7       | 276.1        | 0.2625      | 0.985           | 49.917   |
| 2      | 12.889     | 4644.1       | 167.1        | 0.4219      | 0.538           | 50.083   |

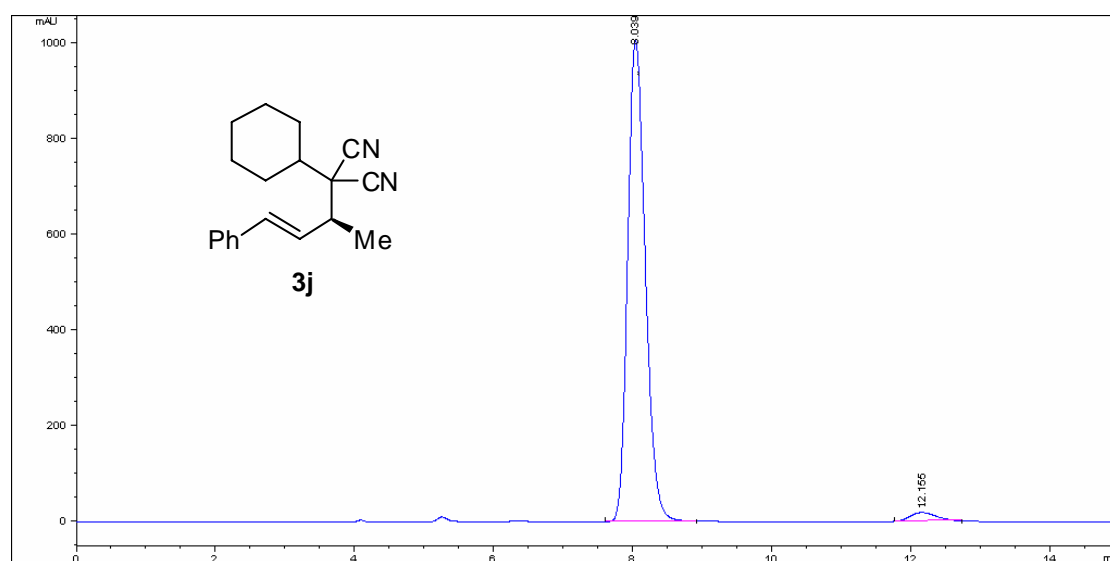

| Number | Time (min) | Area (mAU·s) | Height (mAU) | Width (min) | Symmetry factor | Area (%) |
|--------|------------|--------------|--------------|-------------|-----------------|----------|
| 1      | 8.039      | 17769.8      | 1008.8       | 0.2936      | 0.778           | 97.445   |
| 2      | 12.155     | 465.9        | 17.9         | 0.4347      | 0.781           | 2.555    |

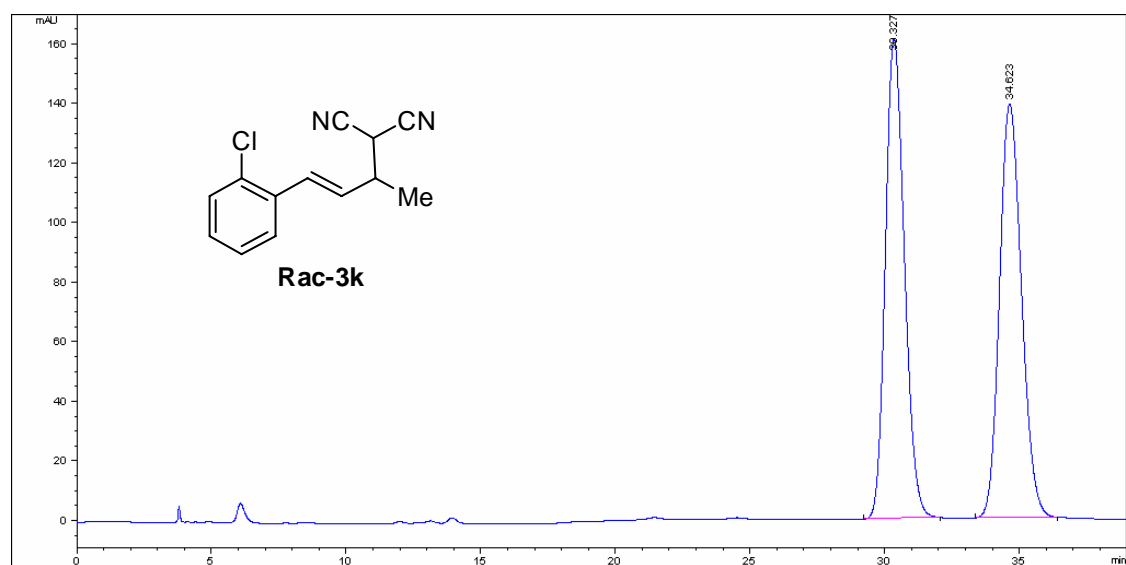

| Number | Time (min) | Area (mAU·s) | Height (mAU) | Width (min) | Symmetry factor | Area (%) |
|--------|------------|--------------|--------------|-------------|-----------------|----------|
| 1      | 30.327     | 7925.5       | 161.1        | 0.7675      | 0.793           | 50.076   |
| 2      | 34.623     | 7901.4       | 139          | 0.8831      | 0.813           | 49.924   |

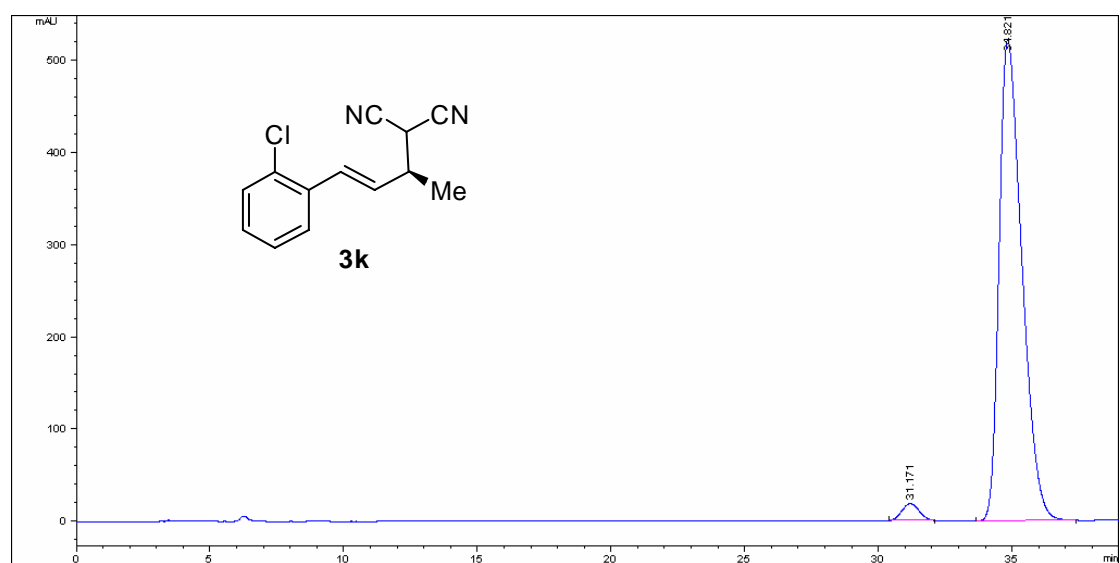

| Number | Time (min) | Area (mAU·s) | Height (mAU) | Width (min) | Symmetry factor | Area (%) |
|--------|------------|--------------|--------------|-------------|-----------------|----------|
| 1      | 31.171     | 861.2        | 18.5         | 0.7744      | 0.914           | 2.690    |
| 2      | 34.821     | 31150.3      | 523.1        | 0.9926      | 0.59            | 97.310   |

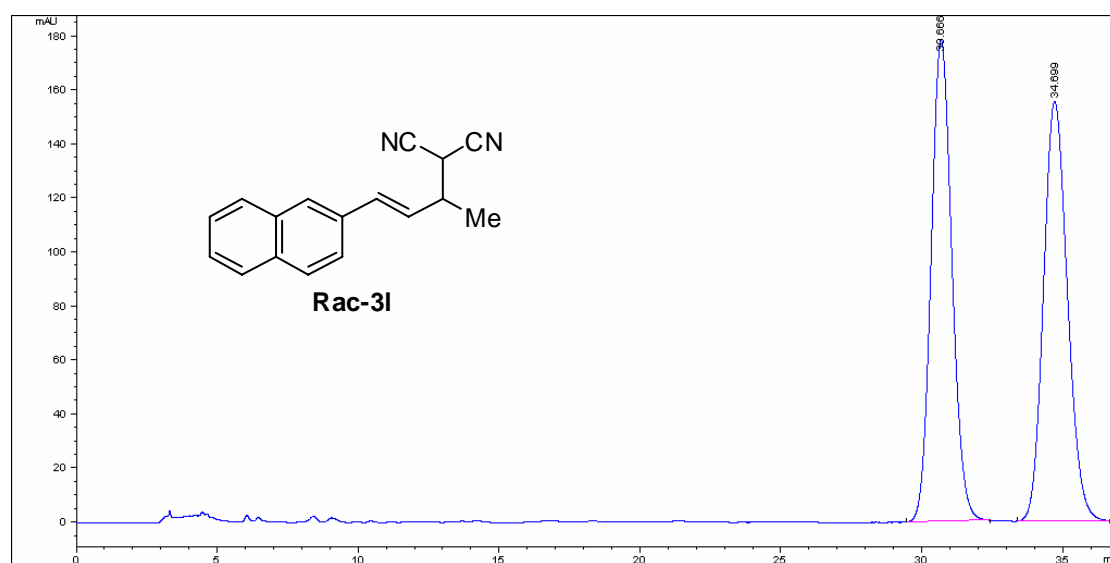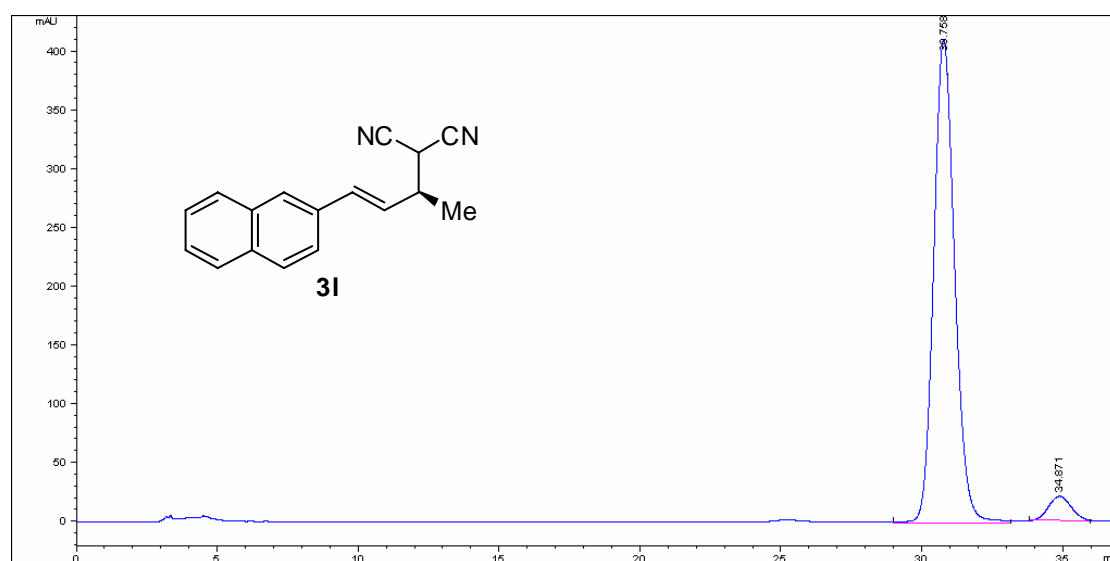

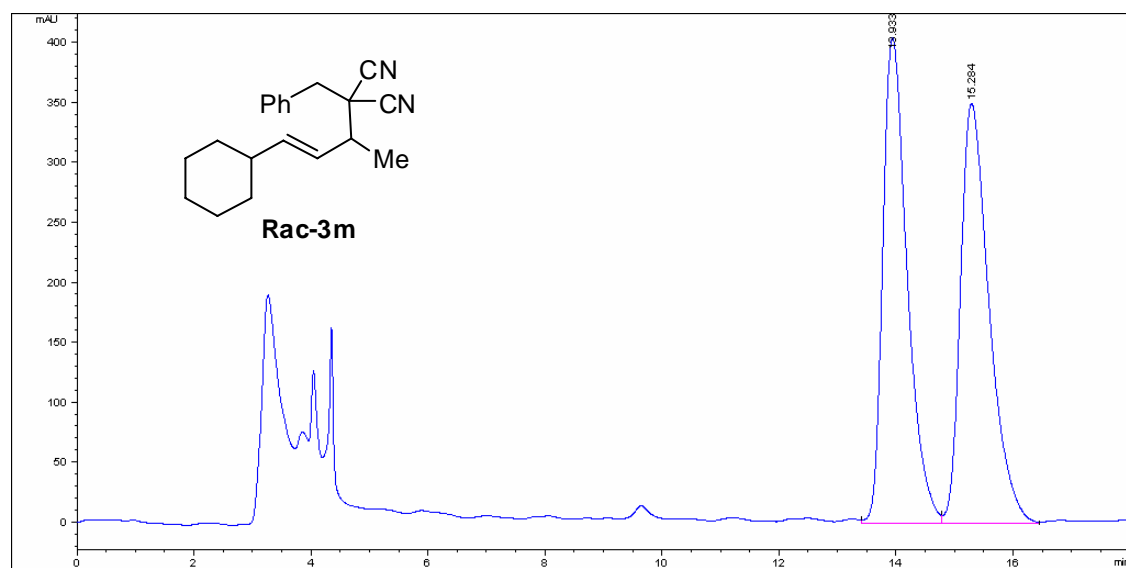

| Number | Time (min) | Area (mAU·s) | Height (mAU) | Width (min) | Symmetry factor | Area (%) |
|--------|------------|--------------|--------------|-------------|-----------------|----------|
| 1      | 13.933     | 11767.3      | 405.3        | 0.4406      | 0.625           | 49.657   |
| 2      | 15.284     | 11929.9      | 350.3        | 0.5182      | 0.589           | 50.343   |

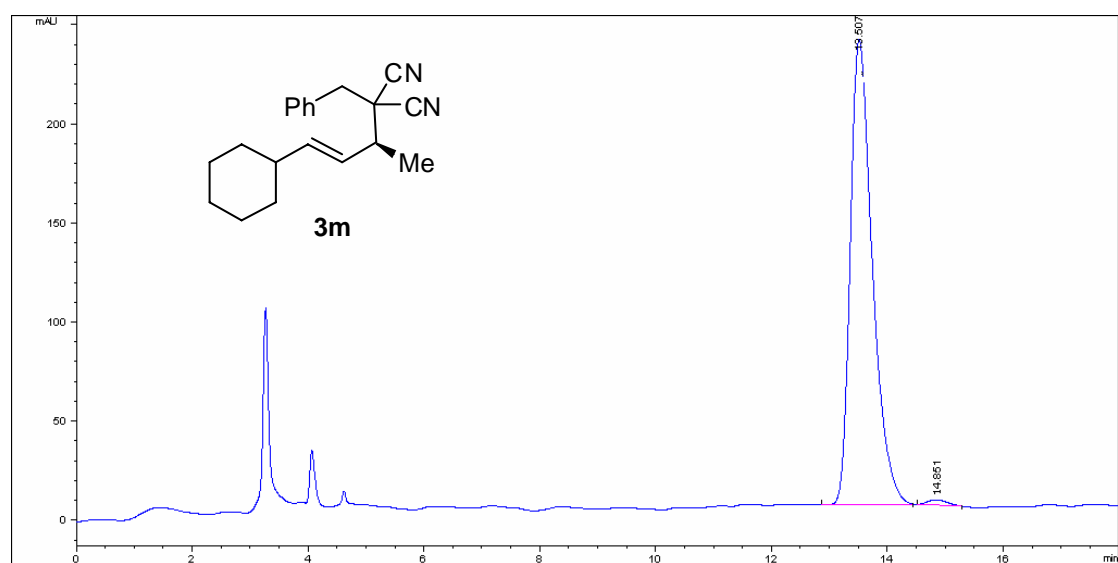

| Number | Time (min) | Area (mAU·s) | Height (mAU) | Width (min) | Symmetry factor | Area (%) |
|--------|------------|--------------|--------------|-------------|-----------------|----------|
| 1      | 13.507     | 6235         | 234.8        | 0.4425      | 0.649           | 98.914   |
| 2      | 14.851     | 68.5         | 2.8          | 0.4091      | 0.755           | 1.086    |

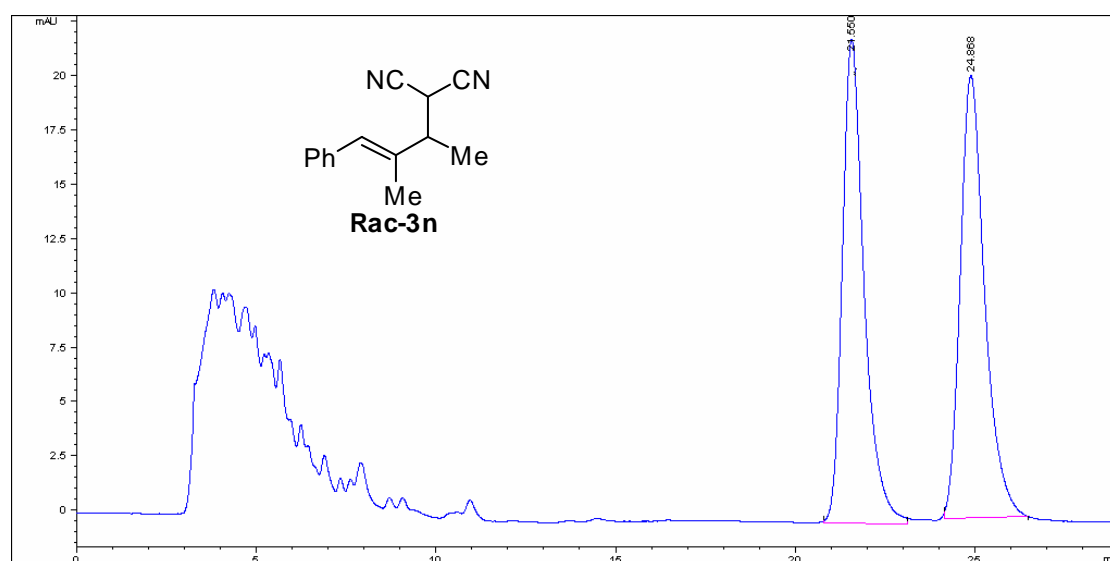

| Number | Time (min) | Area (mAU·s) | Height (mAU) | Width (min) | Symmetry factor | Area (%) |
|--------|------------|--------------|--------------|-------------|-----------------|----------|
| 1      | 21.55      | 940.8        | 22.3         | 0.7038      | 0.699           | 49.332   |
| 2      | 24.868     | 966.2        | 20.4         | 0.79        | 0.733           | 50.668   |

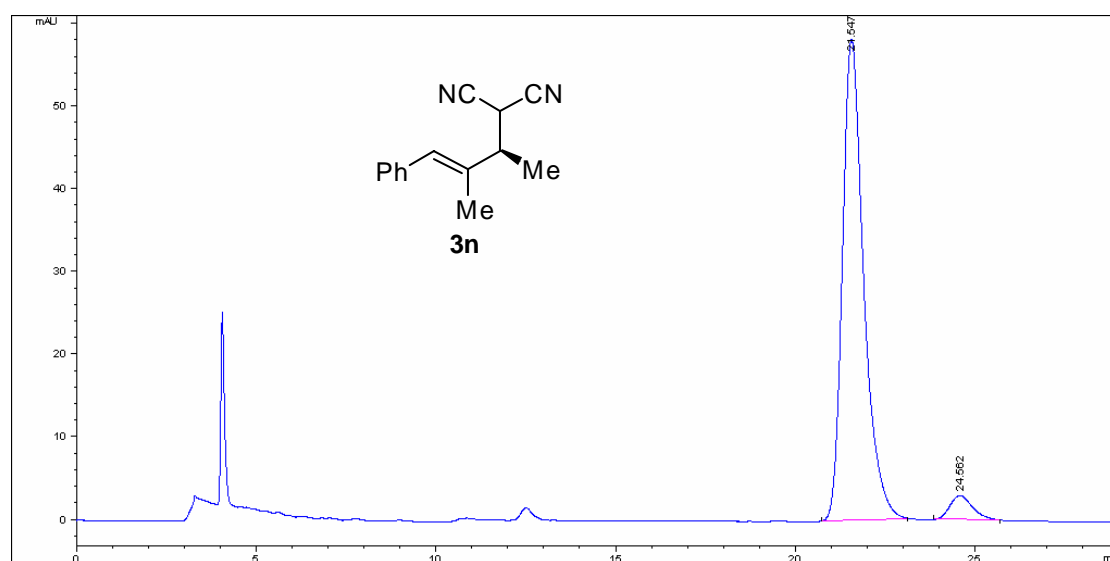

| Number | Time (min) | Area (mAU·s) | Height (mAU) | Width (min) | Symmetry factor | Area (%) |
|--------|------------|--------------|--------------|-------------|-----------------|----------|
| 1      | 21.547     | 2395.6       | 58.2         | 0.6202      | 0.69            | 94.752   |
| 2      | 24.562     | 132.7        | 2.9          | 0.664       | 0.743           | 5.248    |

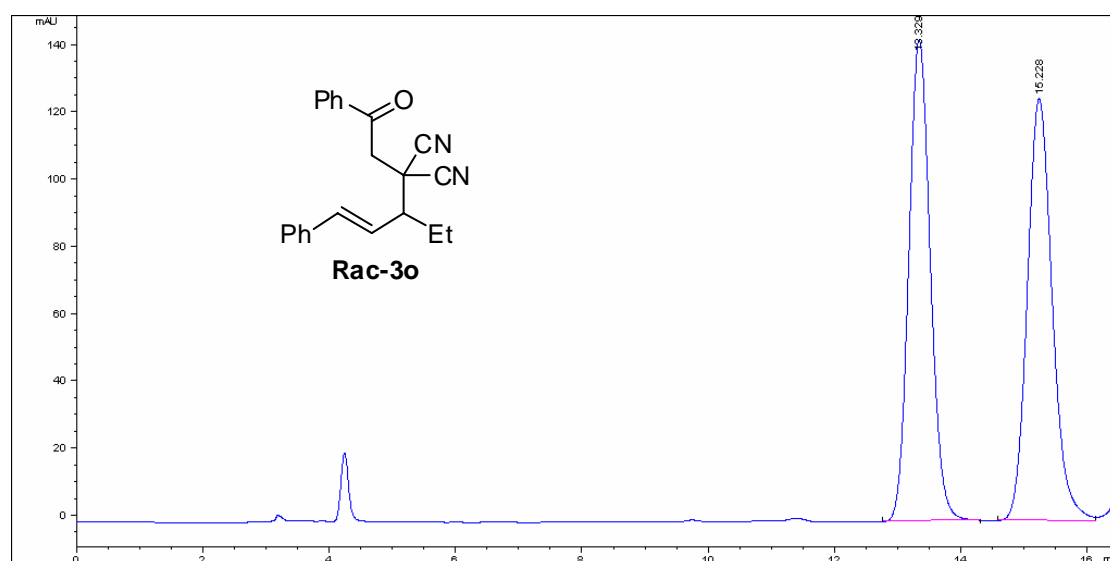

| Number | Time (min) | Area (mAU·s) | Height (mAU) | Width (min) | Symmetry factor | Area (%) |
|--------|------------|--------------|--------------|-------------|-----------------|----------|
| 1      | 13.329     | 3387.9       | 143.2        | 0.3677      | 0.877           | 49.655   |
| 2      | 15.228     | 3434.9       | 125.5        | 0.4227      | 0.846           | 50.345   |

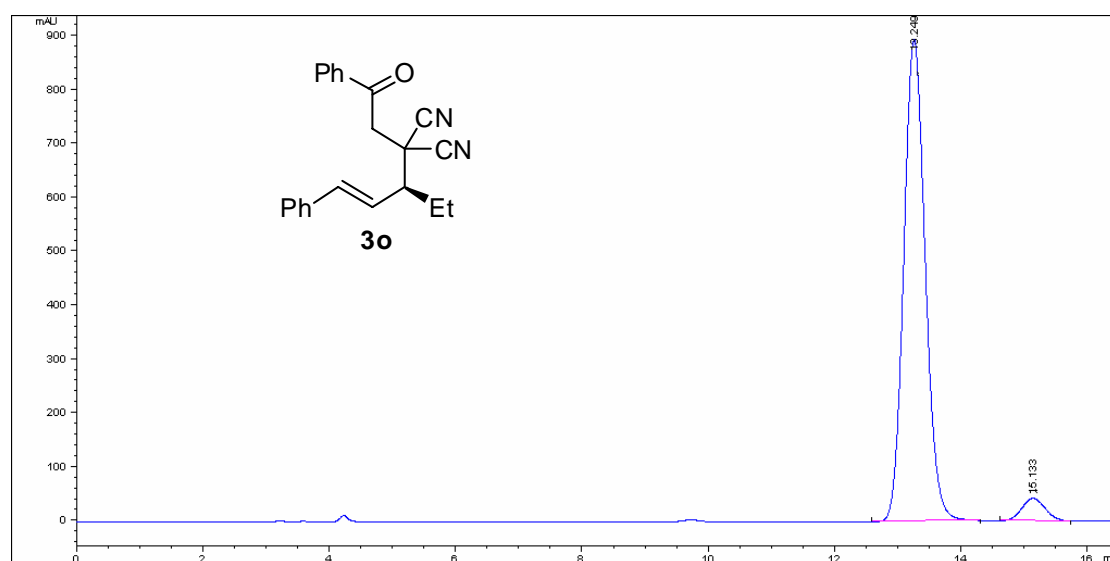

| Number | Time (min) | Area (mAU·s) | Height (mAU) | Width (min) | Symmetry factor | Area (%) |
|--------|------------|--------------|--------------|-------------|-----------------|----------|
| 1      | 13.249     | 21050.5      | 893.8        | 0.3925      | 0.877           | 95.106   |
| 2      | 15.133     | 1083.3       | 41.8         | 0.4321      | 0.905           | 4.894    |



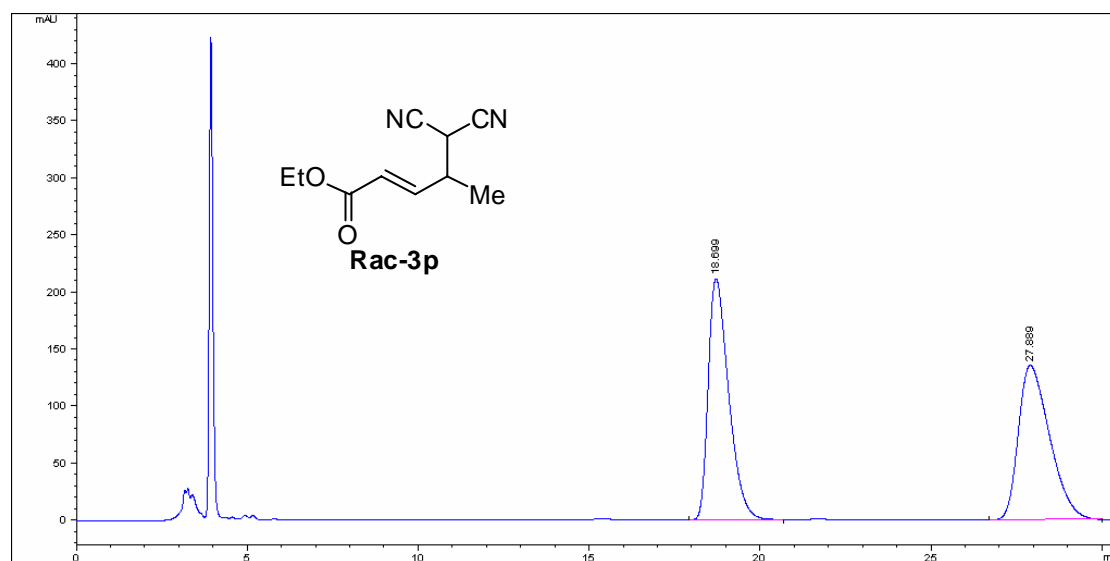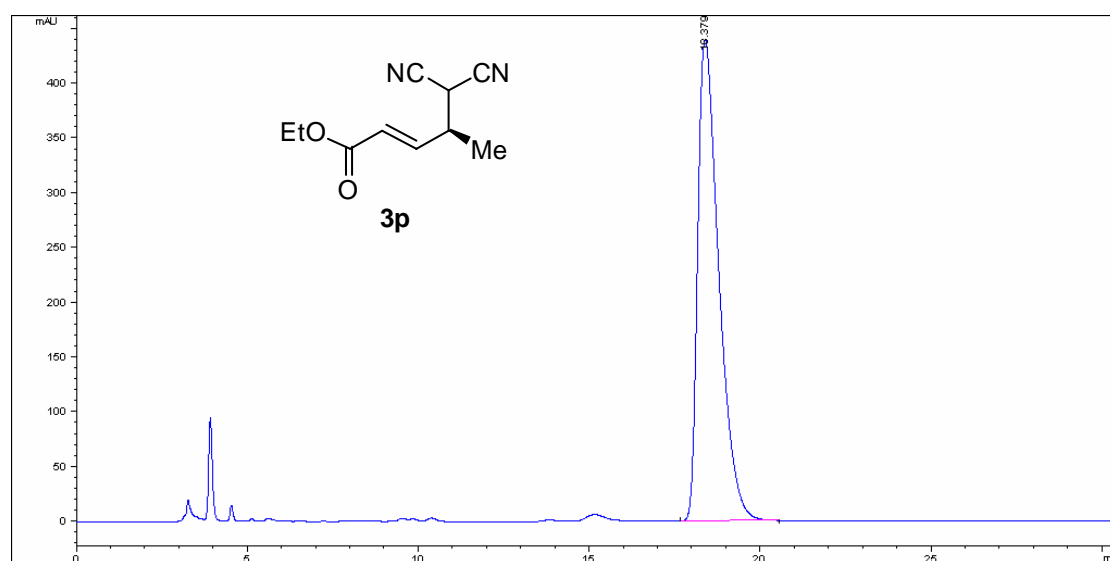

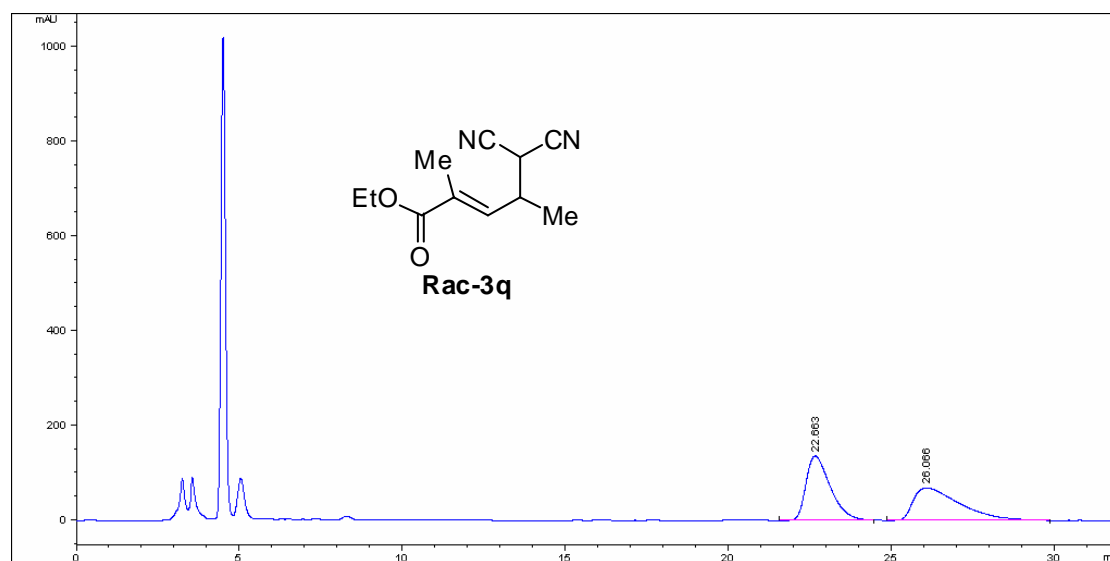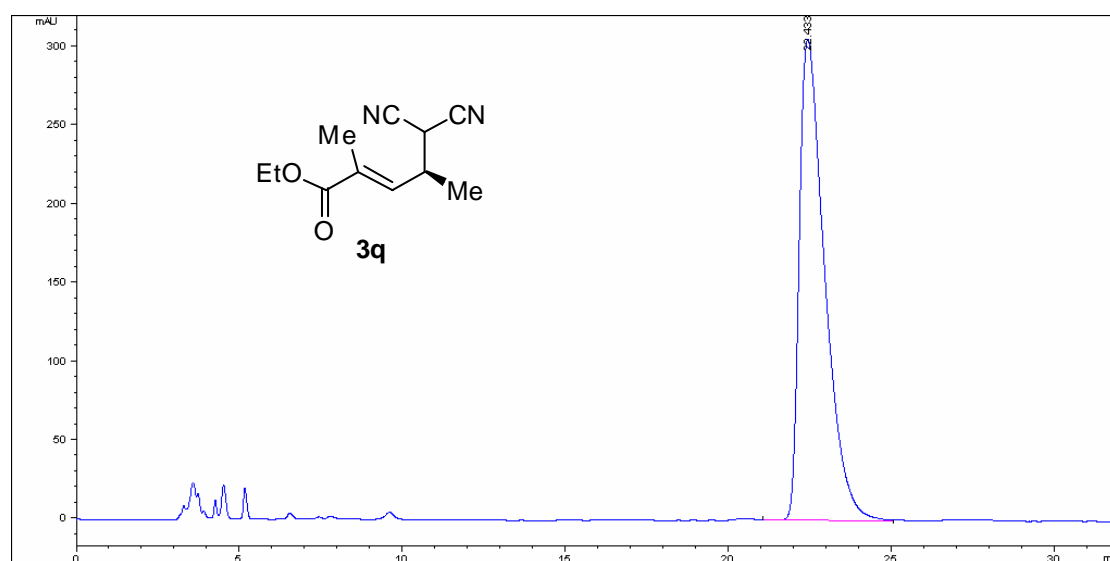

Supplement: c3cc44914a.pdf [file c3cc44914a.pdf]
